# Supplementary material for: Naphtho-Gamma-Pyrones (NγPs) with Obvious Cholesterol Absorption Inhibitory Activity from the Marine-Derived Fungus Aspergillus niger S-48
Source: MDPI journal article supplement (doi:10.3390/molecules27082514), 2022-04-13
Supplement: s1 [file s1]

# Naphtho-Gamma-Pyrones (N<sub>γ</sub>Ps) with Obvious Cholesterol Absorption Inhibitory Activity from the Marine-Derived Fungus *Aspergillus niger* S-48

Chang-Zheng Wu <sup>1,†</sup>, Xiao-Ping Peng <sup>1,†</sup>, Gang Li <sup>1</sup>, Qi Wang <sup>1</sup> and Hong-Xiang Lou <sup>1,2,\*</sup>

<sup>1</sup> Department of Natural Medicinal Chemistry and Pharmacognosy, School of Pharmacy, Qingdao University, Qingdao 266021, China; 2019026576@qdu.edu.cn (C.-Z.W.); pengxiaoping@qdu.edu.cn (X.-P.P.); gang.li@qdu.edu.cn (G.L.); wangqi@hmfl.ac.cn (Q.W.)

<sup>2</sup> Key Laboratory of Chemical Biology of Ministry of Education, Department of Natural Product Chemistry, School of Pharmaceutical Sciences, Shandong University, Jinan, China

\* Correspondence: louhongxiang@sdu.edu.cn; Tel.: +86-531-8838-2012

† These authors contributed equally to this work.

## Contents:

Figures S1–S57

Table S1–S5

|                                                                                                                                    |    |
|------------------------------------------------------------------------------------------------------------------------------------|----|
| <b>Figure S1</b> The 18S rRNA gene sequences data of <i>Aspergillus niger</i> S-48.....                                            | 5  |
| <b>Figure S2</b> Reaction schemes for semisynthetic compounds <b>13</b> and <b>14</b> .....                                        | 6  |
| <b>Figure S3</b> Possible reaction pathway for compounds <b>1</b> and <b>2</b> .....                                               | 7  |
| <b>Figure S4</b> Key HMBC correlations of compound <b>13</b> .....                                                                 | 8  |
| <b>Figure S5</b> Key HMBC correlations of compound <b>14</b> .....                                                                 | 9  |
| <b>Figure S6</b> <sup>1</sup> H NMR spectrum (600 MHz) of compound <b>13</b> in DMSO- <i>d</i> <sub>6</sub> .....                  | 10 |
| <b>Figure S7</b> <sup>13</sup> C NMR spectrum (150 MHz) of compound <b>13</b> in DMSO- <i>d</i> <sub>6</sub> .....                 | 11 |
| <b>Figure S8</b> <sup>1</sup> H- <sup>1</sup> H COSY spectrum (600 MHz) of compound <b>13</b> in DMSO- <i>d</i> <sub>6</sub> ..... | 12 |
| <b>Figure S9</b> HMBC spectrum (600 MHz) of compound <b>13</b> in DMSO- <i>d</i> <sub>6</sub> .....                                | 13 |
| <b>Figure S10</b> HSQC spectrum (600 MHz) of compound <b>13</b> in DMSO- <i>d</i> <sub>6</sub> .....                               | 14 |
| <b>Figure S11</b> HRESIMS spectrum of compound <b>13</b> .....                                                                     | 15 |
| <b>Figure S12</b> <sup>1</sup> H NMR spectrum (600 MHz) of compound <b>14</b> in DMSO- <i>d</i> <sub>6</sub> .....                 | 16 |
| <b>Figure S13</b> <sup>13</sup> C NMR spectrum (150 MHz) of compound <b>14</b> in DMSO- <i>d</i> <sub>6</sub> .....                | 17 |
| <b>Figure S14</b> HMBC spectrum (600 MHz) of compound <b>14</b> in DMSO- <i>d</i> <sub>6</sub> .....                               | 18 |
| <b>Figure S15</b> HSQC spectrum (600 MHz) of compound <b>14</b> in DMSO- <i>d</i> <sub>6</sub> .....                               | 19 |
| <b>Figure S16</b> HRESIMS spectrum of compound <b>14</b> .....                                                                     | 20 |
| <b>Figure S17</b> <sup>1</sup> H NMR spectrum (500 MHz) of compound <b>1</b> in CDCl <sub>3</sub> .....                            | 21 |
| <b>Figure S18</b> <sup>13</sup> C NMR spectrum (125 MHz) of compound <b>1</b> in CDCl <sub>3</sub> .....                           | 22 |
| <b>Figure S19</b> HRESIMS spectrum of compound <b>1</b> .....                                                                      | 23 |
| <b>Figure S20</b> <sup>1</sup> H NMR spectrum (500 MHz) of compound <b>2</b> in CDCl <sub>3</sub> .....                            | 24 |
| <b>Figure S21</b> <sup>13</sup> C NMR spectrum (125 MHz) of compound <b>2</b> in CDCl <sub>3</sub> .....                           | 25 |
| <b>Figure S22</b> HRESIMS spectrum of compound <b>2</b> .....                                                                      | 26 |
| <b>Figure S23</b> <sup>1</sup> H NMR spectrum (500 MHz) of compound <b>3</b> in CDCl <sub>3</sub> .....                            | 27 |
| <b>Figure S24</b> <sup>13</sup> C NMR spectrum (125 MHz) of compound <b>3</b> in CDCl <sub>3</sub> .....                           | 28 |
| <b>Figure S25</b> HRESIMS spectrum of compound <b>3</b> .....                                                                      | 29 |
| <b>Figure S26</b> <sup>1</sup> H NMR spectrum (500 MHz) of compound <b>4</b> in CDCl <sub>3</sub> .....                            | 30 |
| <b>Figure S27</b> <sup>13</sup> C NMR spectrum (125 MHz) of compound <b>4</b> in CDCl <sub>3</sub> .....                           | 31 |
| <b>Figure S28</b> HRESIMS spectrum of compound <b>4</b> .....                                                                      | 32 |
| <b>Figure S29</b> <sup>1</sup> H NMR spectrum (600 MHz) of compound <b>5</b> in CDCl <sub>3</sub> .....                            | 33 |
| <b>Figure S30</b> <sup>13</sup> C NMR spectrum (150 MHz) of compound <b>5</b> in CDCl <sub>3</sub> .....                           | 34 |
| <b>Figure S31</b> ESIMS spectrum of compound <b>5</b> .....                                                                        | 35 |
| <b>Figure S32</b> <sup>1</sup> H NMR spectrum (500 MHz) of compound <b>6</b> in DMSO- <i>d</i> <sub>6</sub> .....                  | 36 |
| <b>Figure S33</b> <sup>13</sup> C NMR spectrum (125 MHz) of compound <b>6</b> in DMSO- <i>d</i> <sub>6</sub> .....                 | 37 |
| <b>Figure S34</b> ESIMS spectrum of compound <b>6</b> .....                                                                        | 38 |

|                                                                                                                                    |    |
|------------------------------------------------------------------------------------------------------------------------------------|----|
| <b>Figure S35</b> $^1\text{H}$ NMR spectrum (500 MHz) of compound <b>7</b> in $\text{DMSO}-d_6$ .....                              | 39 |
| <b>Figure S36</b> $^{13}\text{C}$ NMR spectrum (125 MHz) of compound <b>7</b> in $\text{DMSO}-d_6$ .....                           | 40 |
| <b>Figure S37</b> ESIMS spectrum of compound <b>7</b> .....                                                                        | 41 |
| <b>Figure S38</b> $^1\text{H}$ NMR spectrum (500 MHz) of compound <b>8</b> in $\text{CDCl}_3$ .....                                | 42 |
| <b>Figure S39</b> $^{13}\text{C}$ NMR spectrum (125 MHz) of compound <b>8</b> in $\text{CDCl}_3$ .....                             | 43 |
| <b>Figure S40</b> ESIMS spectrum of compound <b>8</b> .....                                                                        | 44 |
| <b>Figure S41</b> $^1\text{H}$ NMR spectrum (500 MHz) of compound <b>9</b> in $\text{DMSO}-d_6$ .....                              | 45 |
| <b>Figure S42</b> $^{13}\text{C}$ NMR spectrum (125 MHz) of compound <b>9</b> in $\text{DMSO}-d_6$ .....                           | 46 |
| <b>Figure S43</b> ESIMS spectrum of compound <b>9</b> .....                                                                        | 47 |
| <b>Figure S44</b> $^1\text{H}$ NMR spectrum (600 MHz) of compound <b>10</b> in $\text{DMSO}-d_6$ .....                             | 48 |
| <b>Figure S45</b> $^{13}\text{C}$ NMR spectrum (150 MHz) of compound <b>10</b> in $\text{DMSO}-d_6$ .....                          | 49 |
| <b>Figure S46</b> ESIMS spectrum of compound <b>10</b> .....                                                                       | 50 |
| <b>Figure S47</b> $^1\text{H}$ NMR spectrum (500 MHz) of compound <b>11</b> in $\text{DMSO}-d_6$ .....                             | 51 |
| <b>Figure S48</b> $^{13}\text{C}$ NMR spectrum (125 MHz) of compound <b>11</b> in $\text{DMSO}-d_6$ .....                          | 52 |
| <b>Figure S49</b> ESIMS spectrum of compound <b>11</b> .....                                                                       | 53 |
| <b>Figure S50</b> $^1\text{H}$ NMR spectrum (500 MHz) of compound <b>12</b> in $\text{CDCl}_3$ .....                               | 54 |
| <b>Figure S51</b> $^{13}\text{C}$ NMR spectrum (125 MHz) of compound <b>12</b> in $\text{CDCl}_3$ .....                            | 55 |
| <b>Figure S52</b> ESIMS spectrum of compound <b>12</b> .....                                                                       | 56 |
| <b>Figure S53</b> Experimental ECD spectra of compound <b>1-4</b> .....                                                            | 57 |
| <b>Figure S54</b> Experimental ECD spectra of compound <b>1, 2, and 4</b> in the previously reported data.....                     | 57 |
| <b>Figure S55</b> Comparison of $^1\text{H}$ NMR spectrums (500 MHz) of compounds <b>1-4</b> in $\text{CDCl}_3$ .....              | 58 |
| <b>Figure S56</b> Comparison of $^{13}\text{C}$ NMR spectrums (125 MHz) of compounds <b>1-4</b> in $\text{CDCl}_3$ .....           | 59 |
| <b>Figure S57</b> $^1\text{H}$ and $^{13}\text{C}$ NMR data of compounds <b>5-12</b> .....                                         | 61 |
| <b>Table S1</b> $^1\text{H}$ NMR (600 MHz) and $^{13}\text{C}$ NMR (150 MHz) data of compound <b>13</b> in $\text{DMSO}-d_6$ ..... | 62 |
| <b>Table S2</b> $^1\text{H}$ NMR (600 MHz) and $^{13}\text{C}$ NMR (150 MHz) data of compound <b>14</b> in $\text{DMSO}-d_6$ ..... | 63 |
| <b>Table S3</b> $^1\text{H}$ NMR (500 MHz) data of compounds <b>1-4</b> in $\text{CDCl}_3$ .....                                   | 64 |
| <b>Table S4</b> $^{13}\text{C}$ NMR (125 MHz) data of compounds <b>1-4</b> in $\text{CDCl}_3$ .....                                | 65 |
| <b>Table S5</b> Optical rotations of compounds <b>1-4</b> in MeOH at 20 °C.....                                                    | 67 |

TGCGGAAGGATCATTACCGAGTGCGGGTCTTTGGGCCCAACCTCCCATCCGTGTCTATTGTAC  
 CCTGTTGCTTCGGCGGGCCCGCCGCTTGTCTCGGCCGCCGGGGGGGCGCCTCTGCCCCCGGGCCC  
 GTGCCCCGCCGAGACCCCAACACGAACACTGTCTGAAAGCGTGCAGTCTGAGTTGATTGAATG  
 CAATCAGTTAAACTTTCAACAATGGATCTCTTGGTTCCGGCATCGATGAAGAACGCAGCGAA  
 ATGCGATAACTAATGTGAATTGCAGAATTCAGTGAATCATCGAGTCTTTGAACGCACATTGCGC  
 CCCCTGGTATTCCGGGGGGCATGCCTGTCCGAGCGTCATTGCTGCCCTCAAGCCCGGCTTGTGT  
 GTTGGGTCGCCGTCCCCCTCTCCGGGGGGACGGGCCCGAAAGGCAGCGGCGGCACCGCGTCCG  
 ATCCTCGAGCGTATGGGGCTTTGTCACATGCTCTGTAGGATTGGCCGGCGCCTGCCGACGTTTT  
 CCAACCATTCTTTCCAGGTTGACCTCGGATCAGGTAGGGATACCCGCTGAACTTAAGCATATC

**Figure S1.** The 18S rRNA gene sequences data of *Aspergillus niger* S-48.

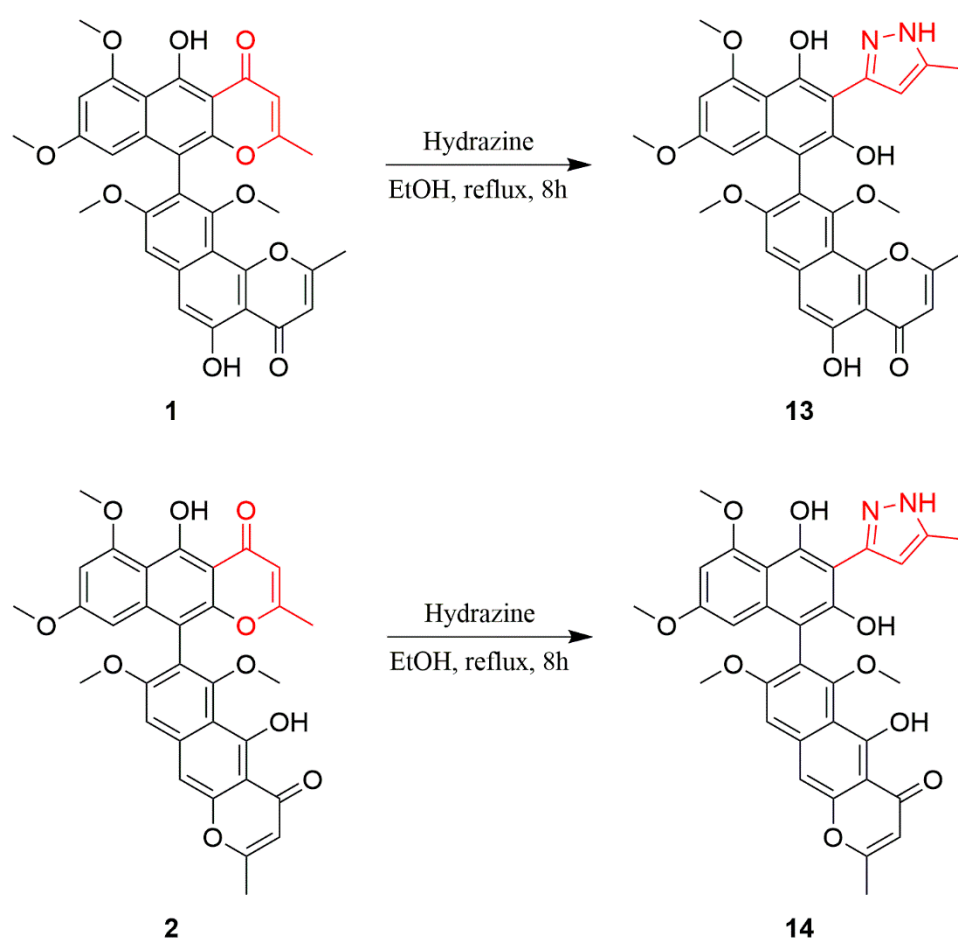

**Figure S2.** Reaction schemes for semisynthetic compounds **13** and **14**.

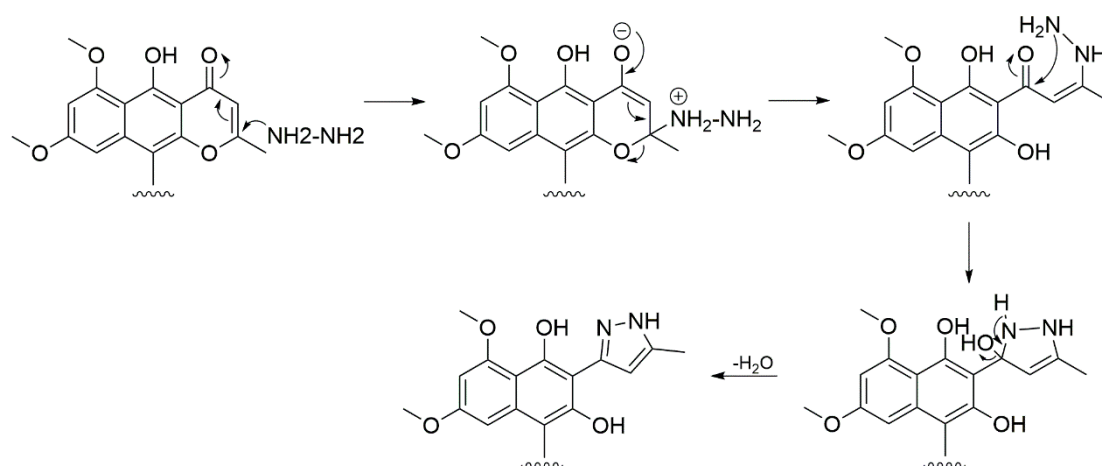

**Figure S3.** Possible reaction pathway for compounds **1** and **2**.

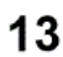

**Figure S4.** Key HMBC correlations of compound **13**.

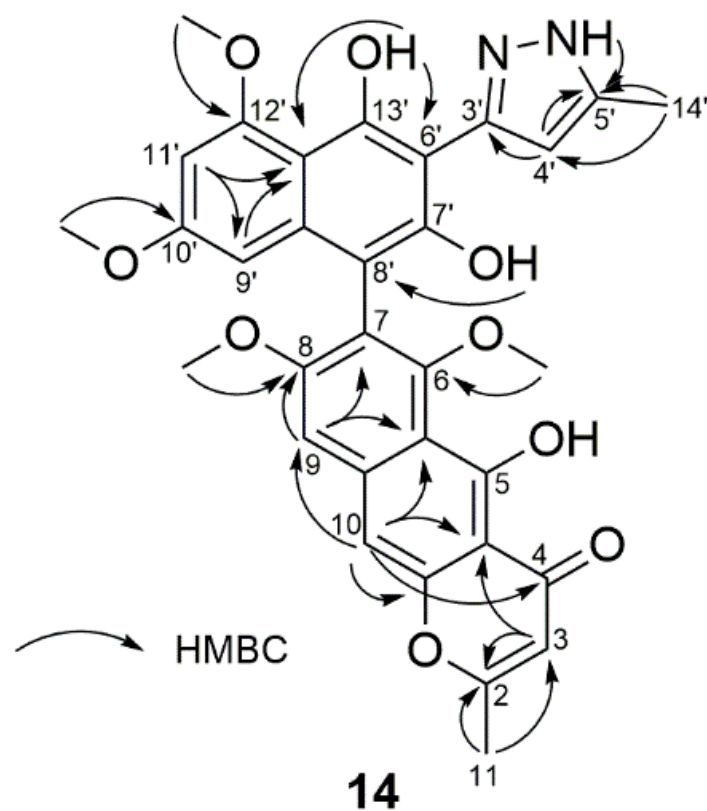

**Figure S5.** Key HMBC correlations of compound 14.

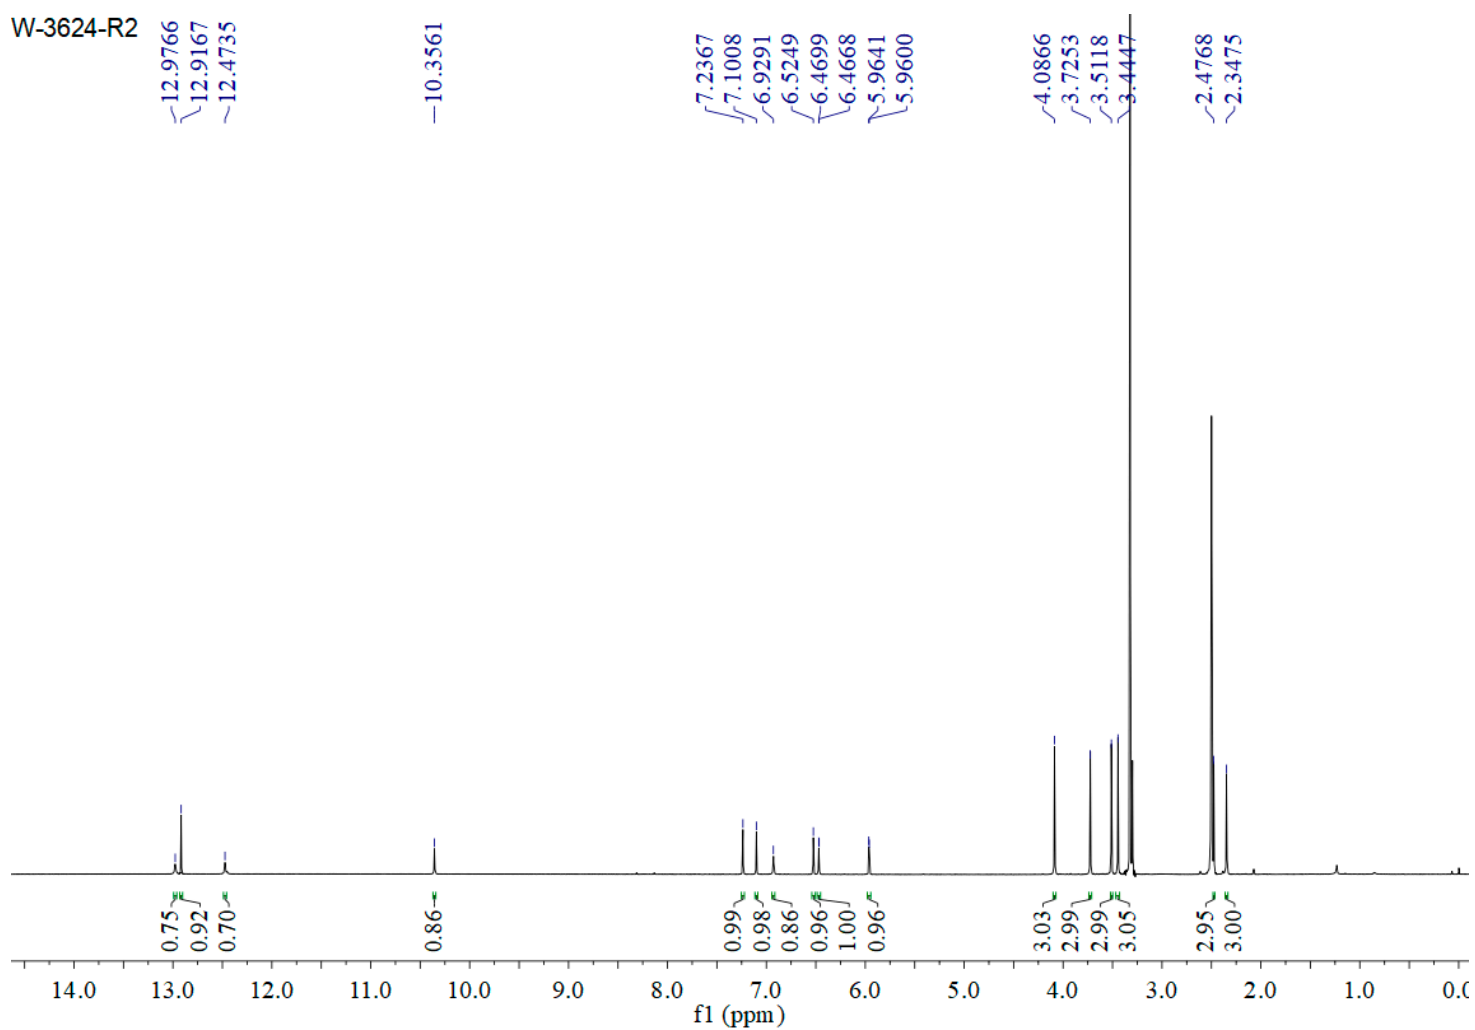

Figure S6.  $^1\text{H}$  NMR spectrum (600 MHz) of compound **13** in  $\text{DMSO}-d_6$ .

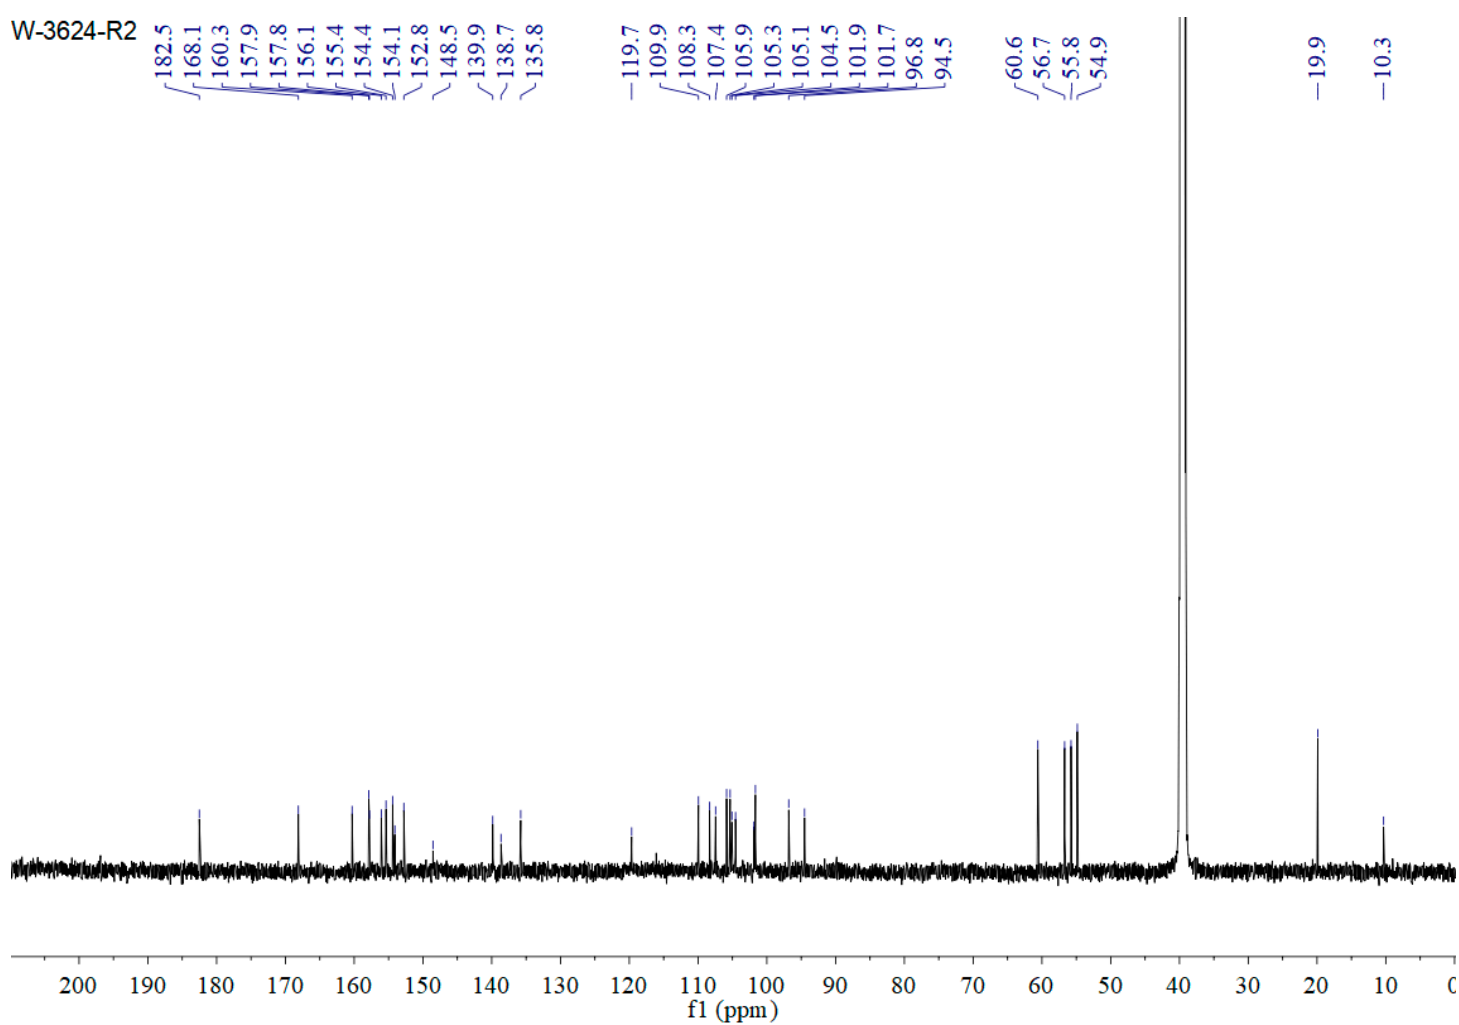

Figure S7.  $^{13}\text{C}$  NMR spectrum (150 MHz) of compound 13 in  $\text{DMSO-}d_6$ .



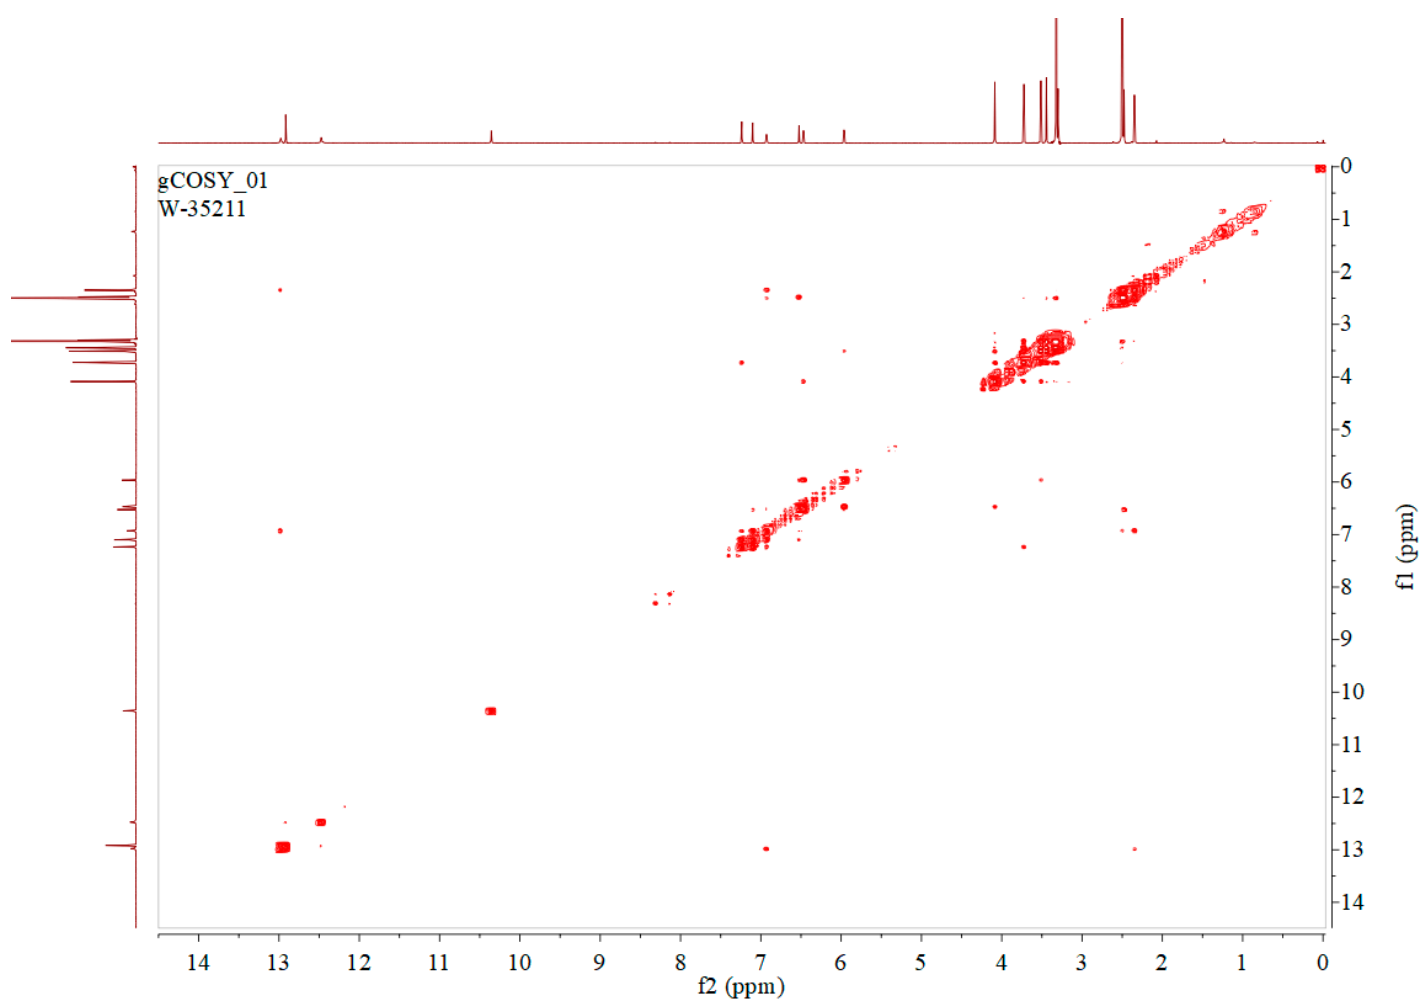

**Figure S8.**  $^1\text{H}$ - $^1\text{H}$  COSY spectrum (600 MHz) of compound **13** in  $\text{DMSO}-d_6$ .

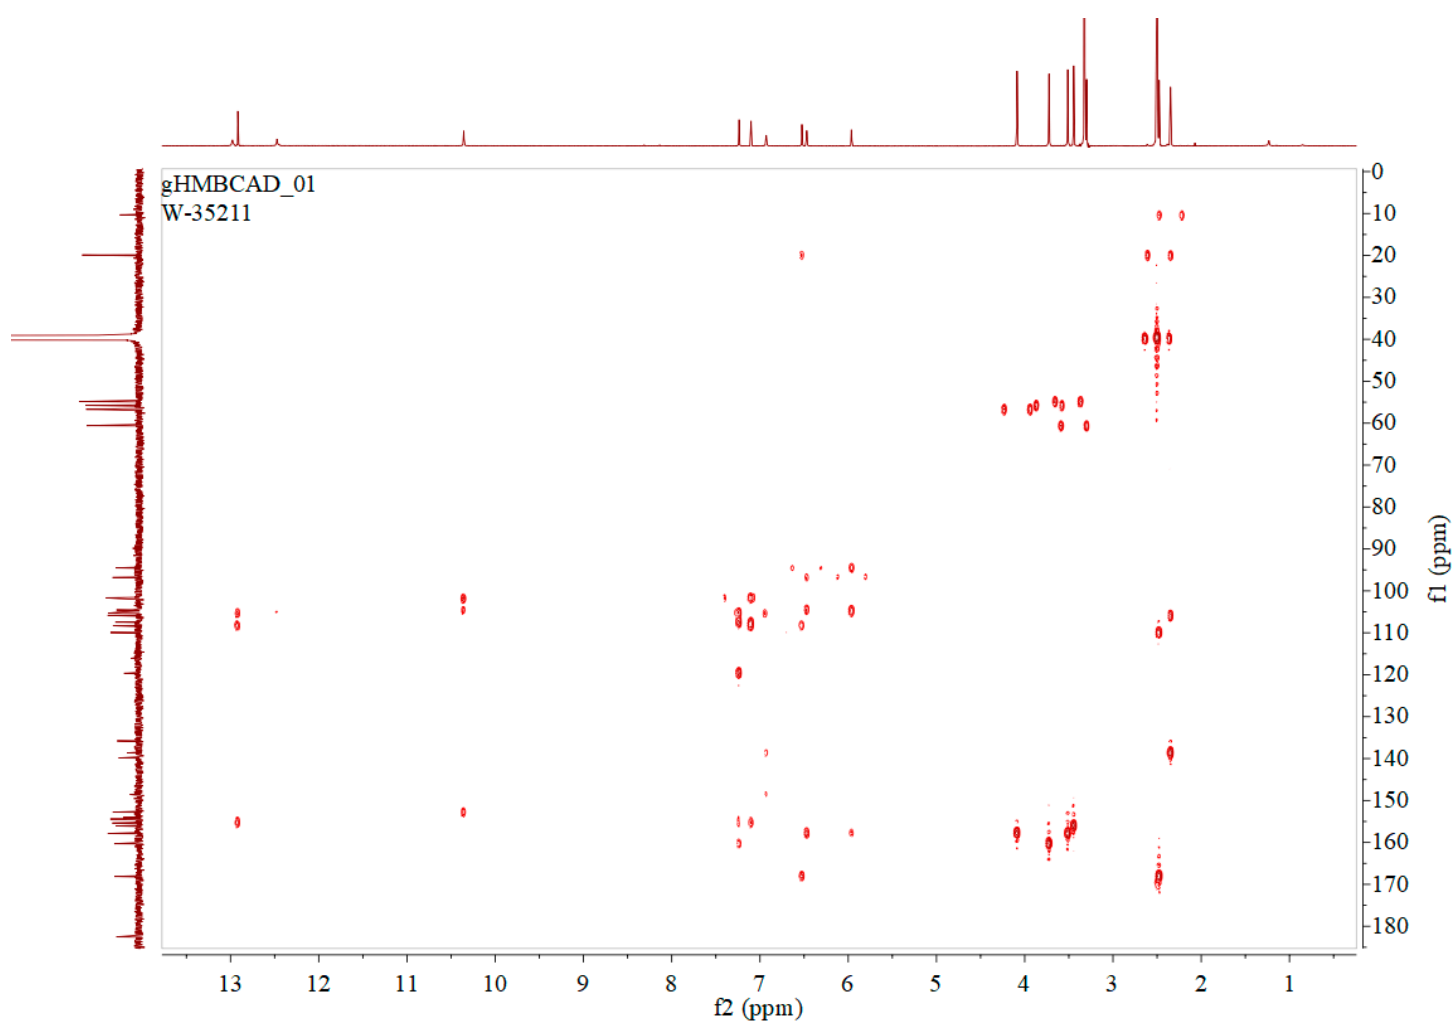

**Figure S9.** HMBC spectrum (600 MHz) of compound **13** in DMSO-*d*<sub>6</sub>.

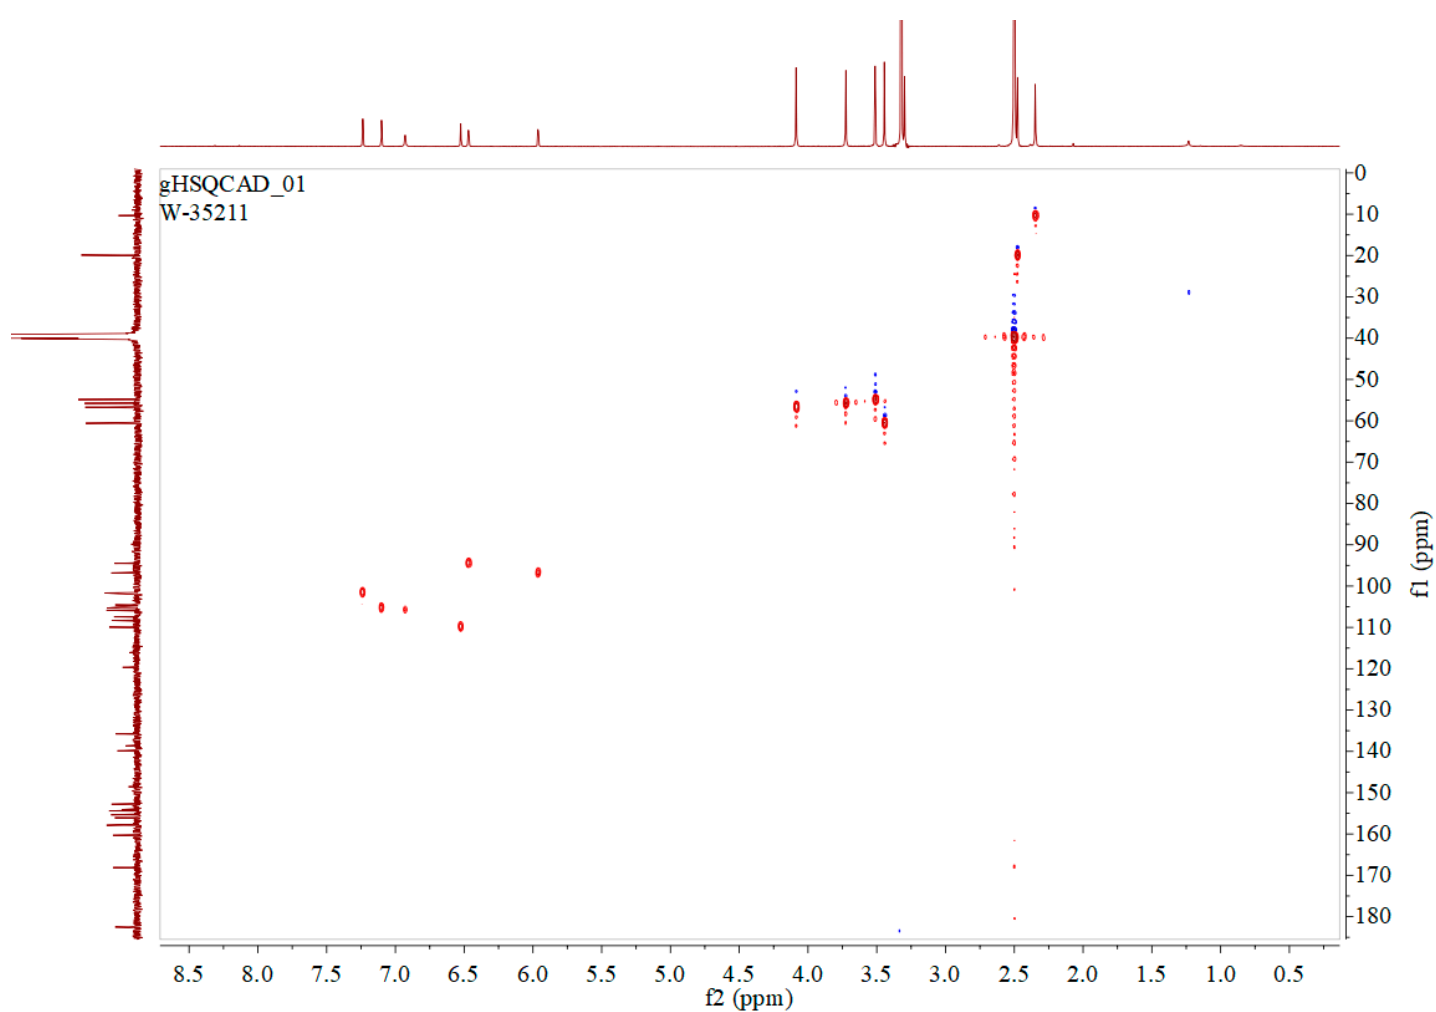

**Figure S10.** HSQC spectrum (600 MHz) of compound **13** in DMSO-*d*<sub>6</sub>.

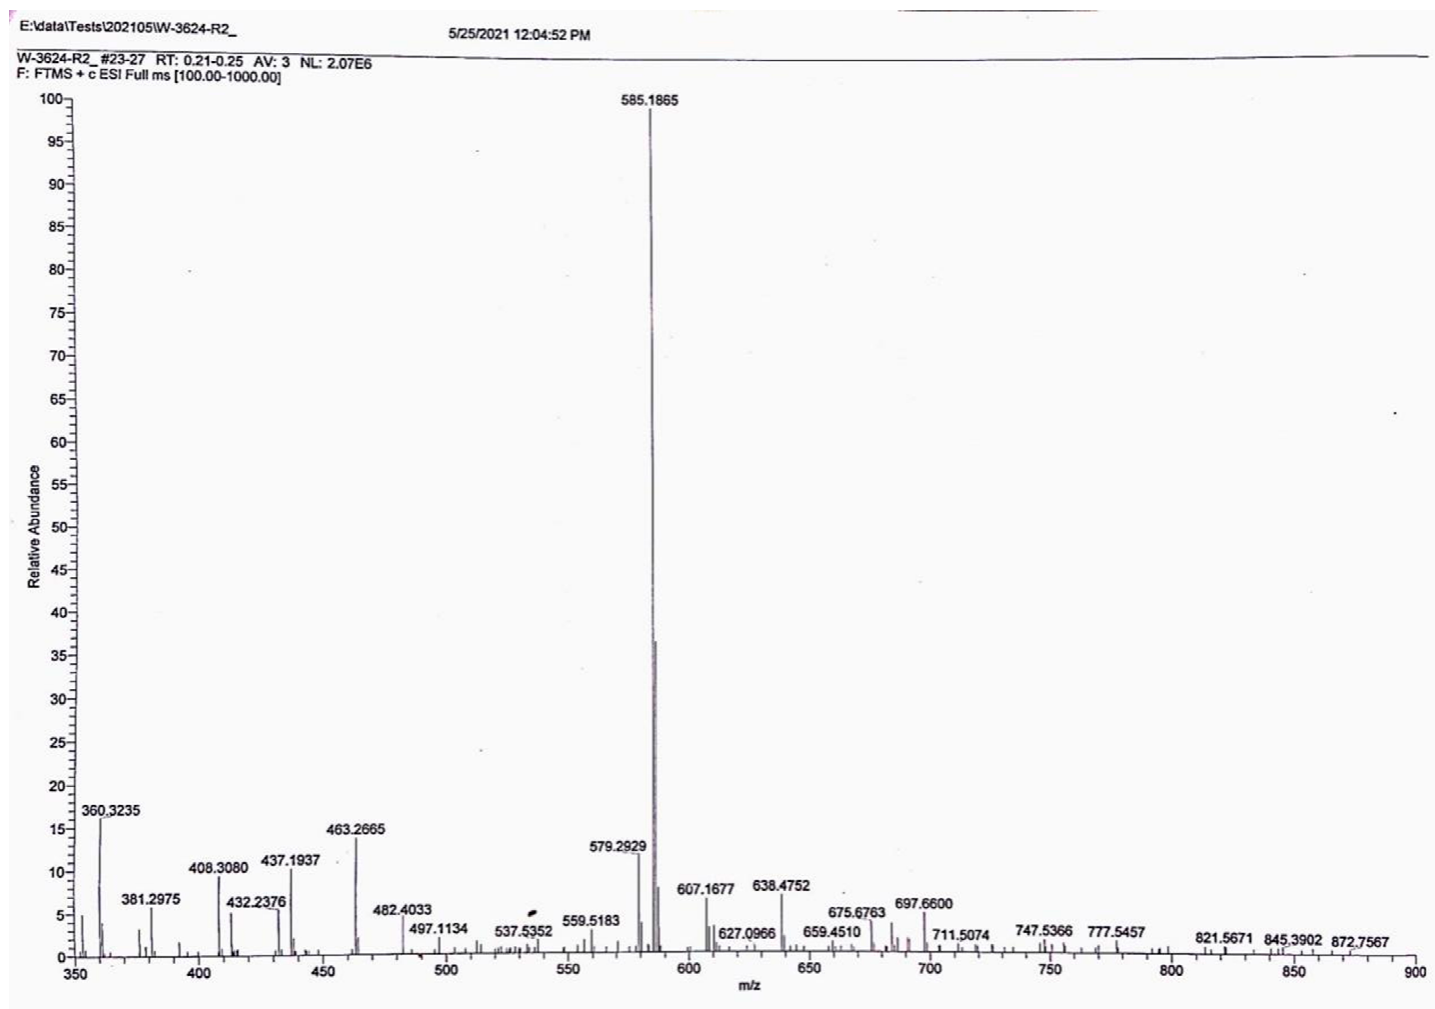

Figure S11. HRESIMS spectrum of compound 13.

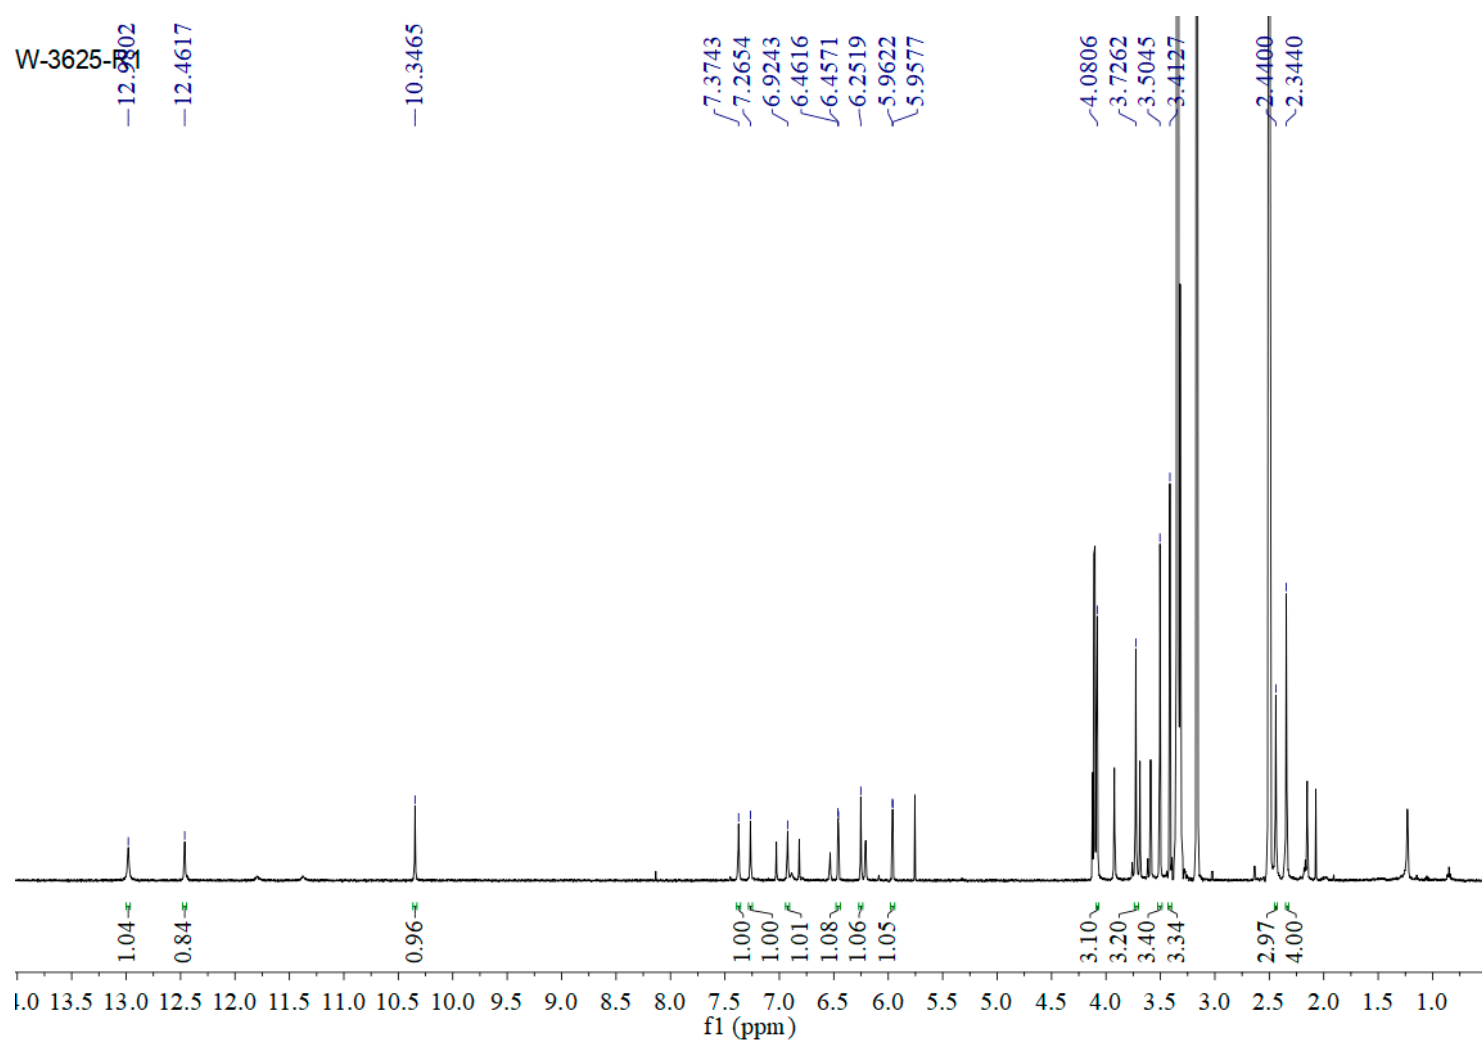

**Figure S12.** <sup>1</sup>H NMR spectrum (600 MHz) of compound **14** in DMSO-*d*<sub>6</sub>.

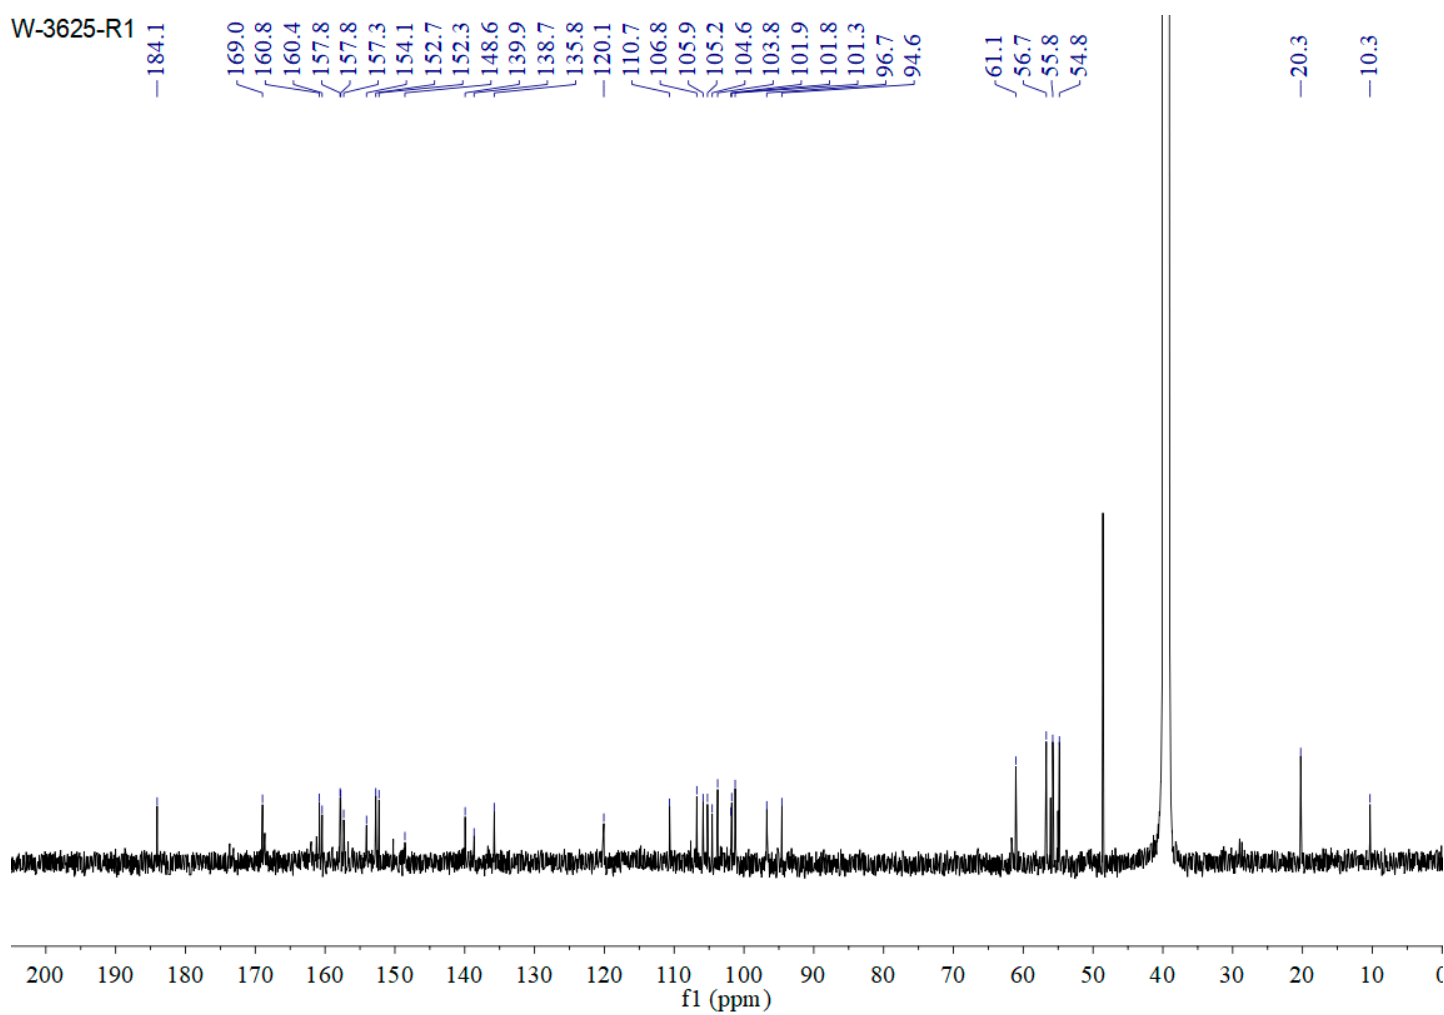

Figure S13.  $^{13}\text{C}$  NMR spectrum (150 MHz) of compound **14** in  $\text{DMSO}-d_6$ .

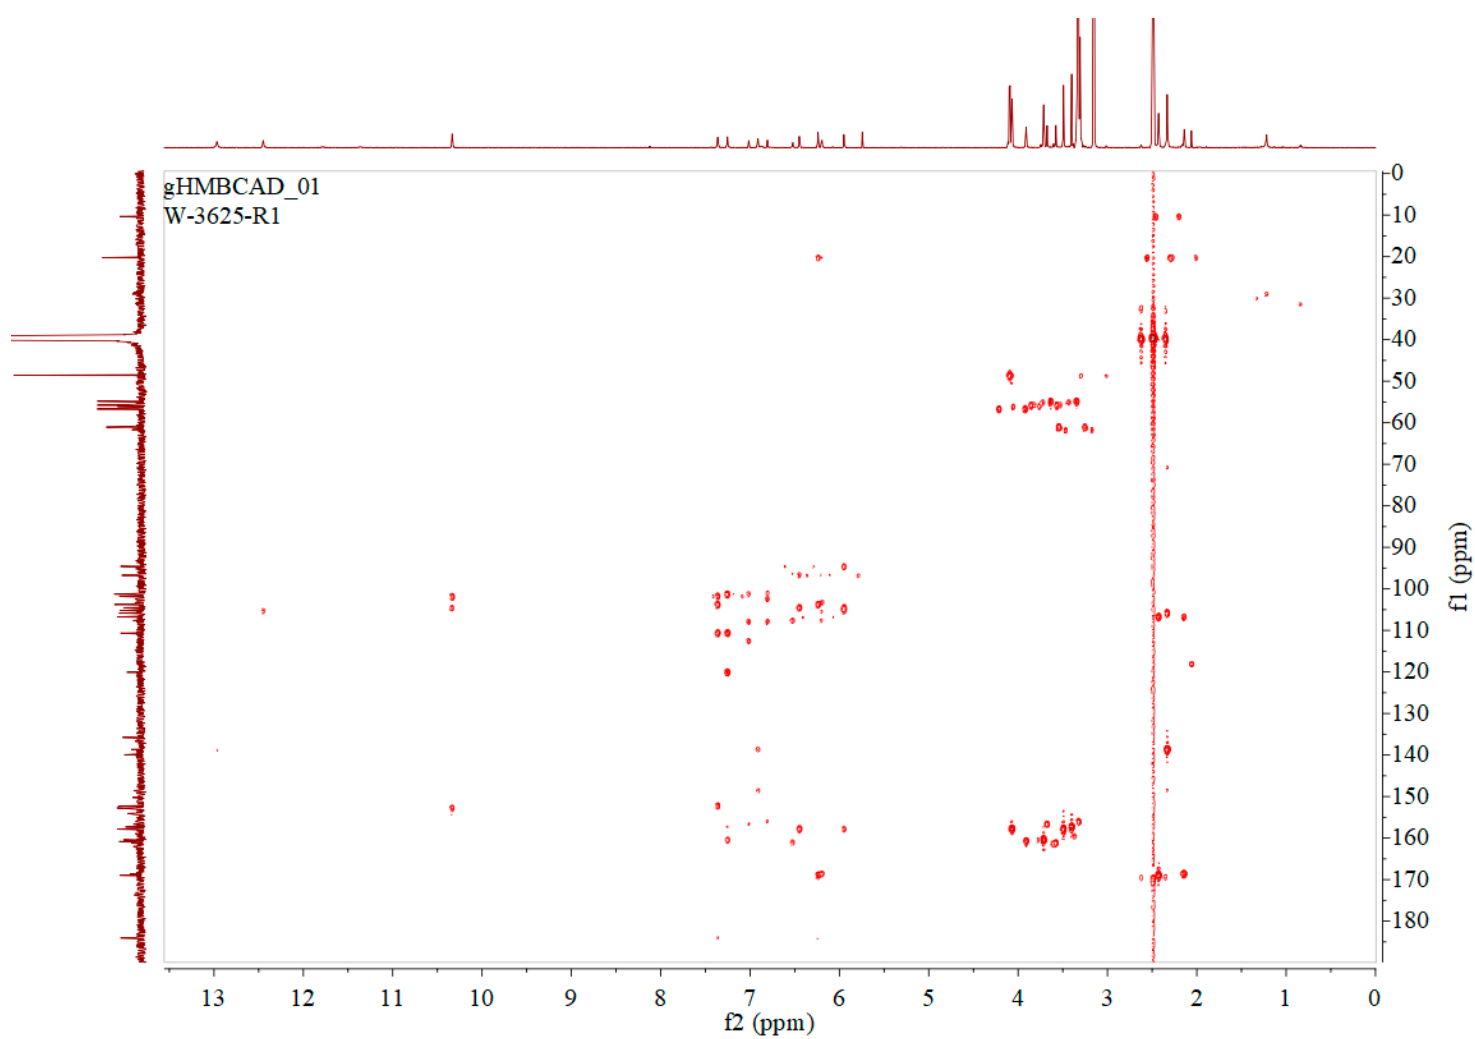

**Figure S14.** HMBC spectrum (600 MHz) of compound **14** in DMSO- $d_6$ .

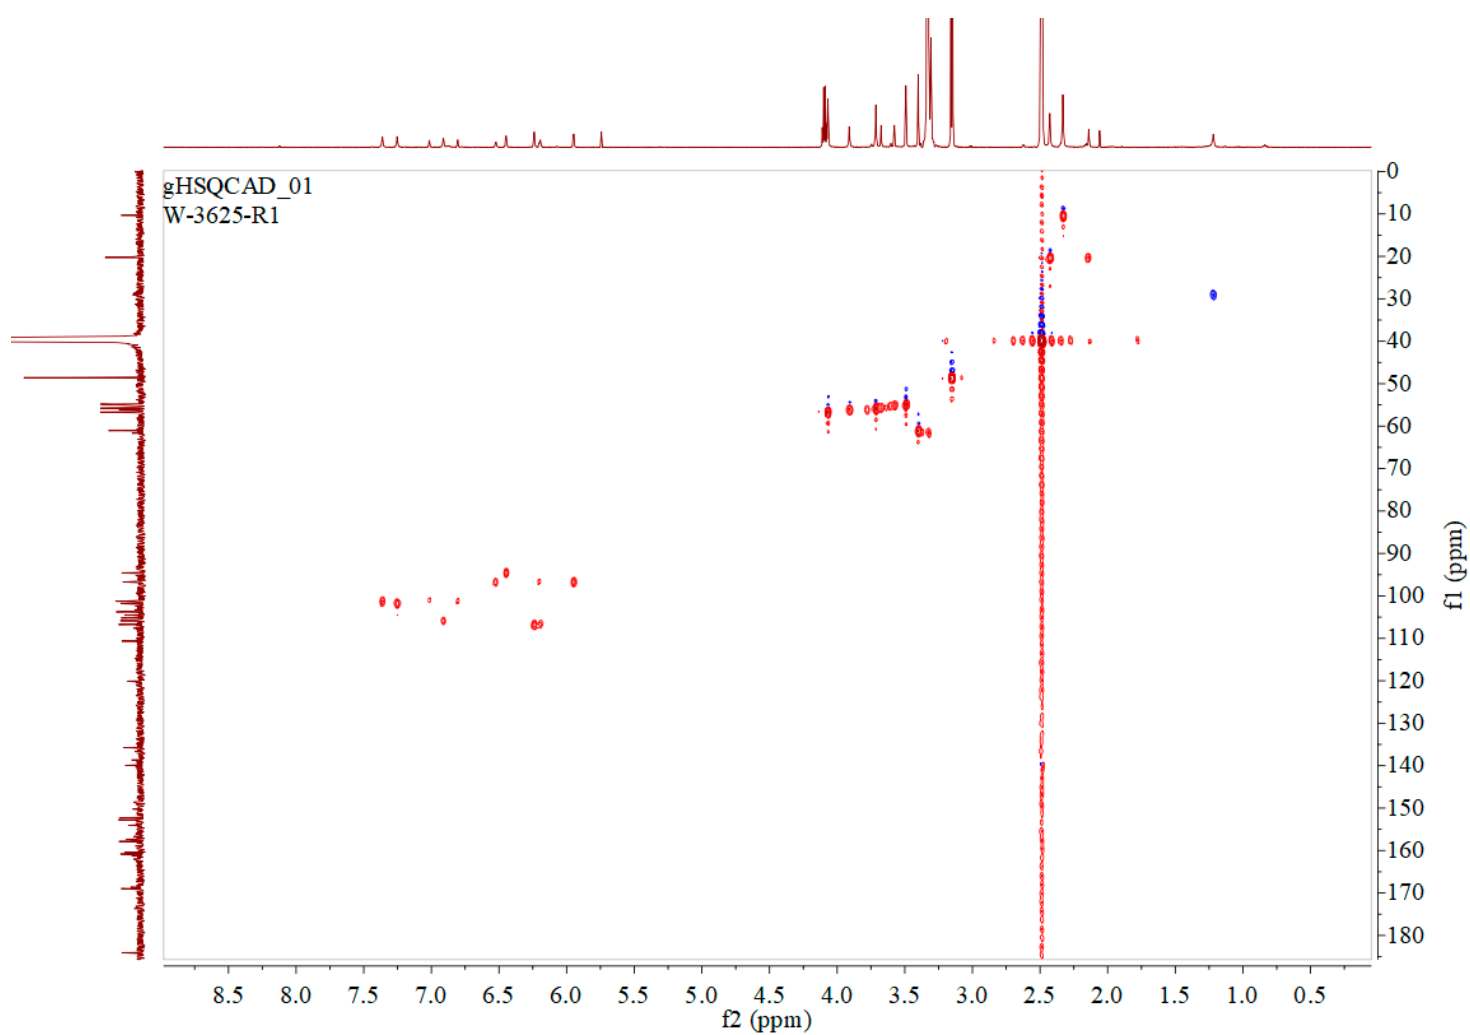

**Figure S15.** HSQC spectrum (600 MHz) of compound **14** in DMSO-*d*<sub>6</sub>.



20210419-W-3625-R1\_210416102948 #3 RT: 0.02 AV: 1 NL: 4.08E6  
T: FTMS + p ESI Full ms [150.00-2000.00]

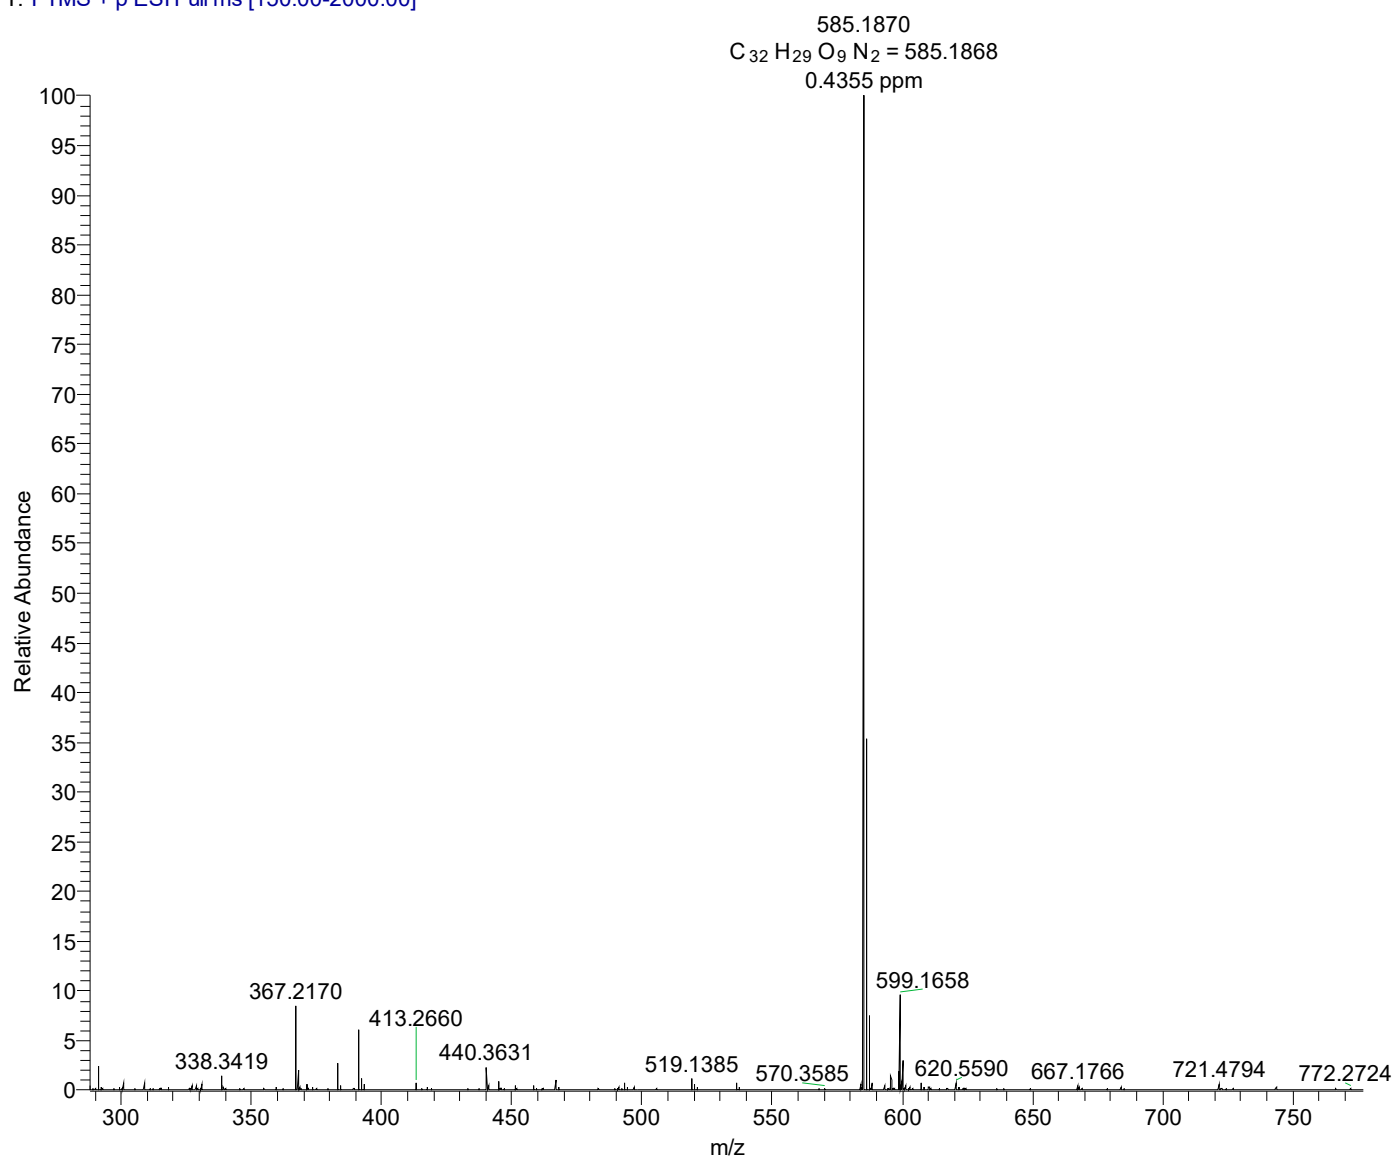

Figure S16. HRESIMS spectrum of compound 14.

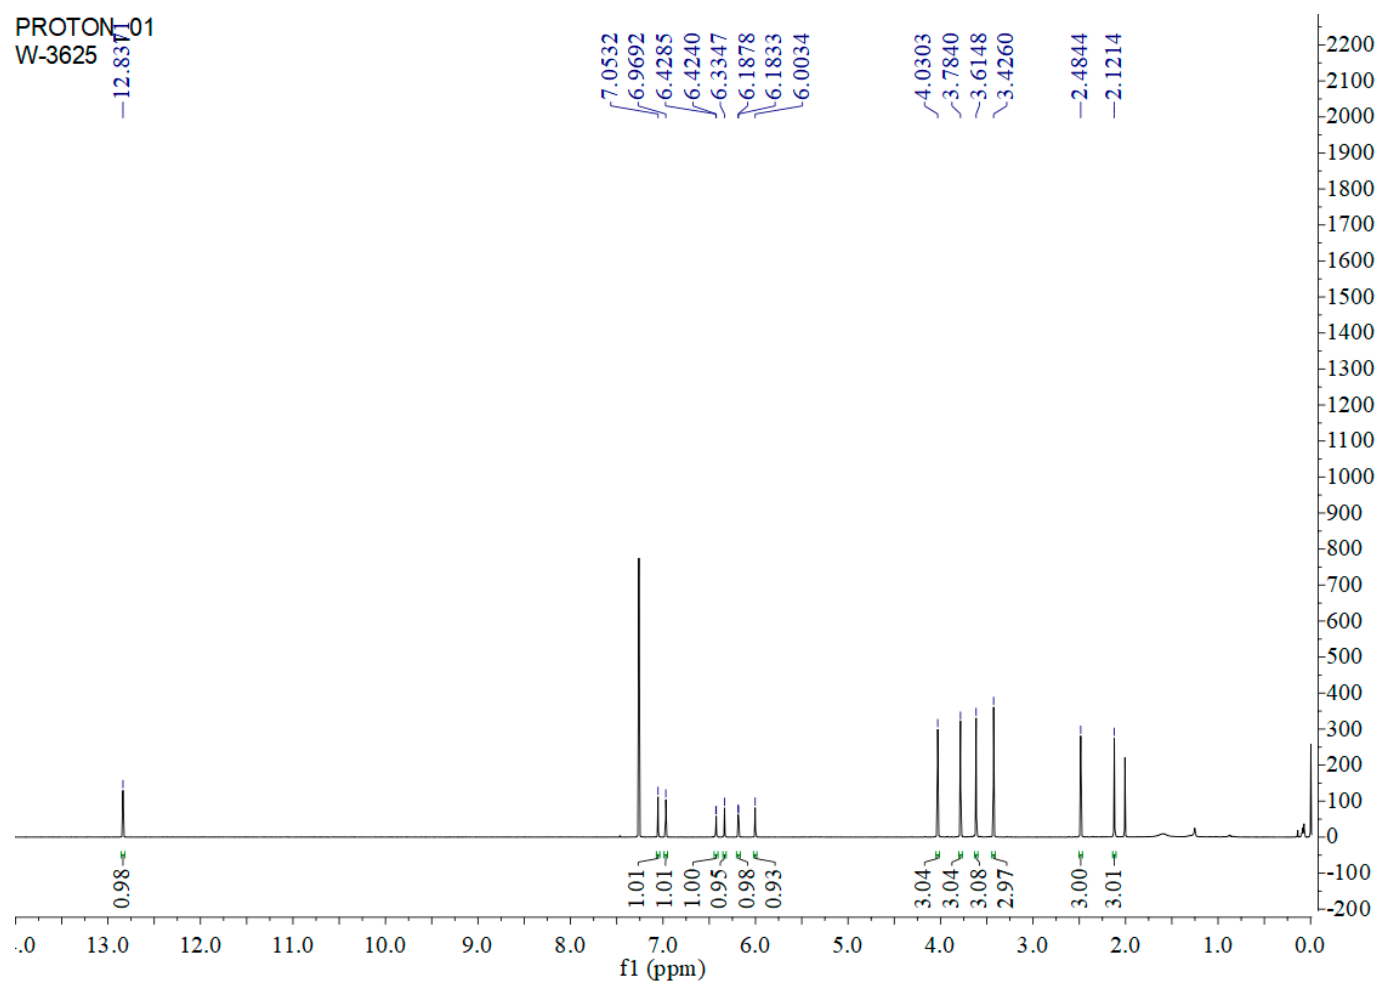

Figure S17.  $^1\text{H}$  NMR spectrum (500 MHz) of compound **1** in  $\text{CDCl}_3$ .

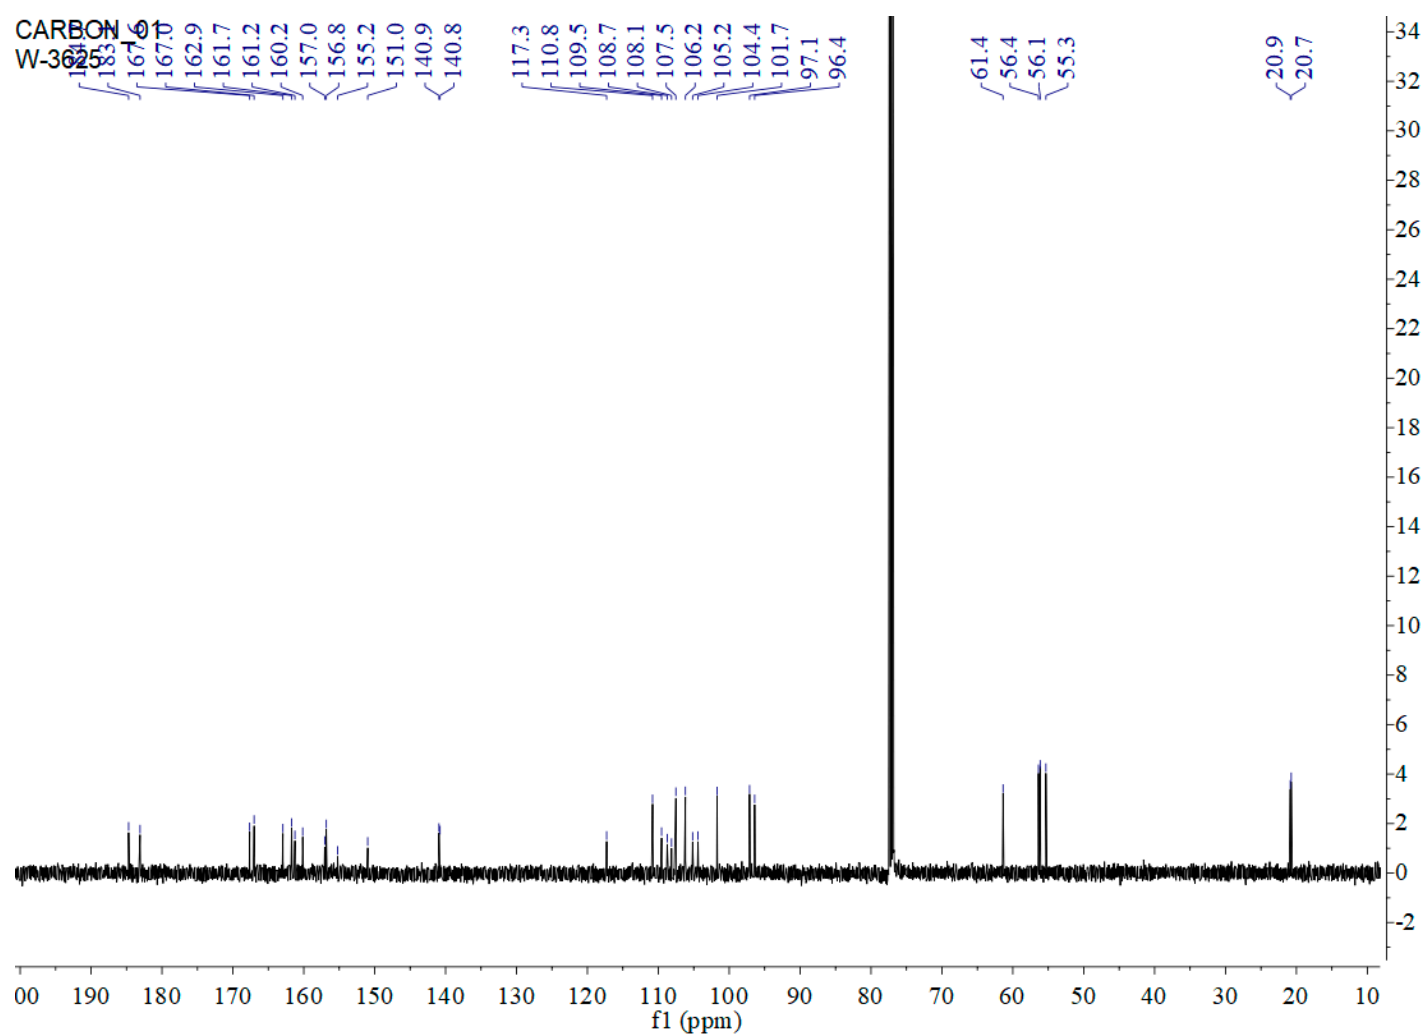

**Figure S18.**  $^{13}\text{C}$  NMR spectrum (125 MHz) of compound 1 in  $\text{CDCl}_3$ .

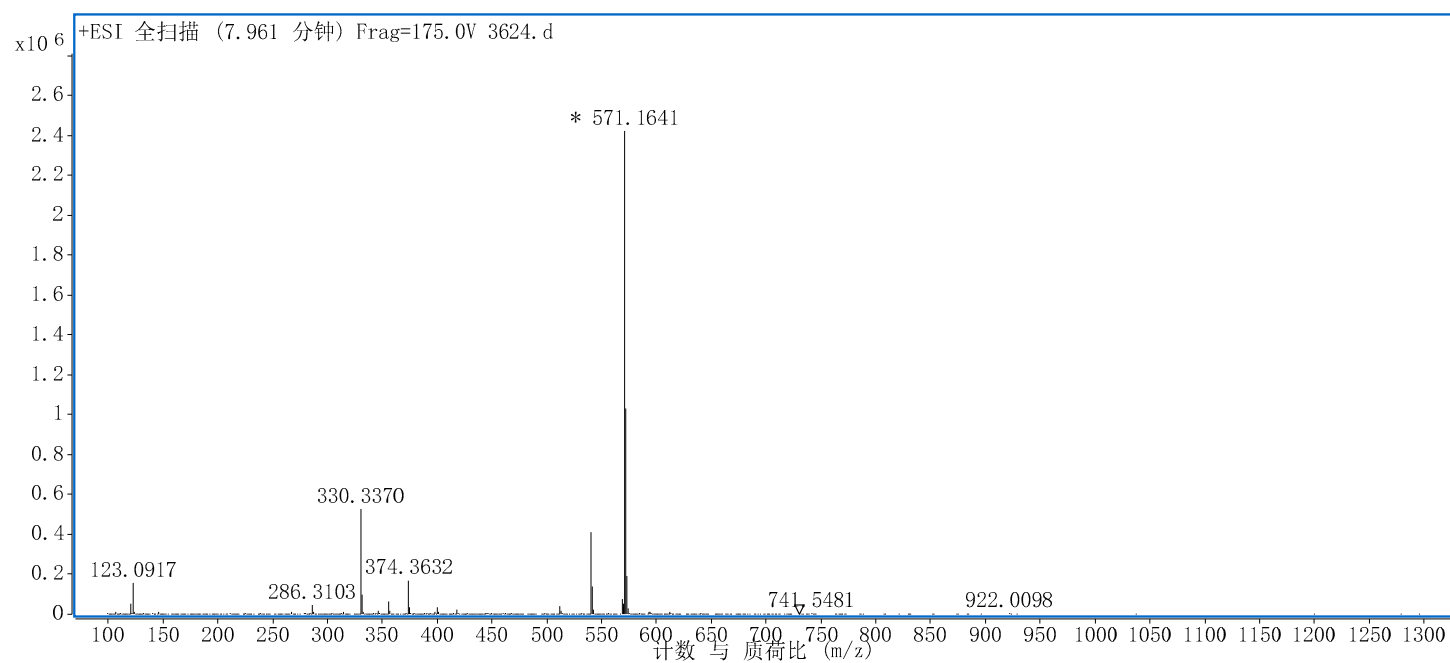

**Figure S19.** HRESIMS spectrum of compound **1**.

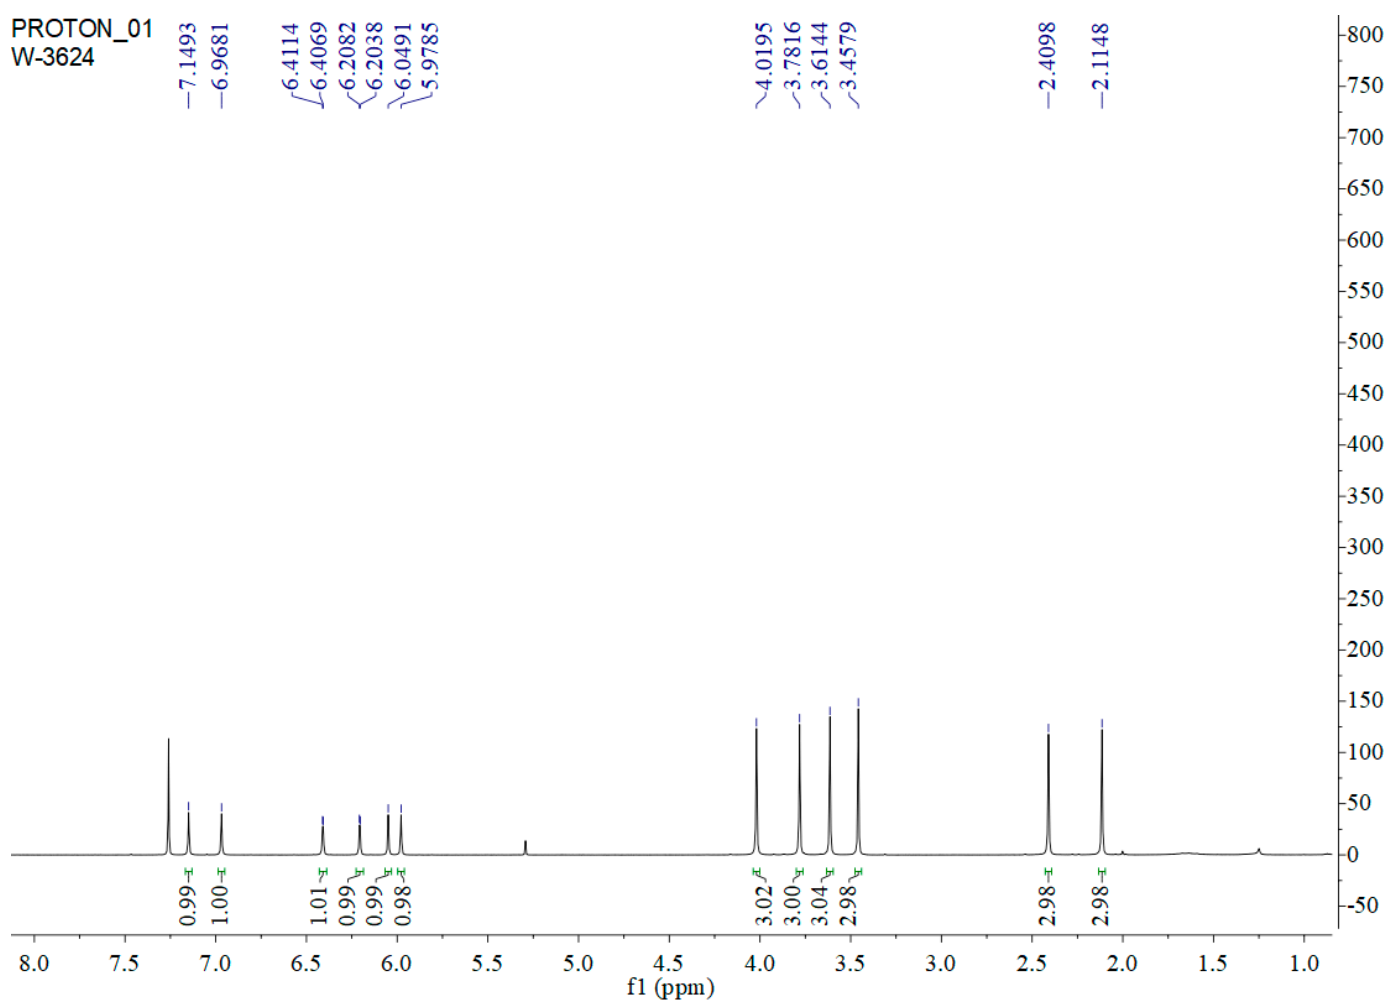

Figure S20.  $^1\text{H}$  NMR spectrum (500 MHz) of compound **2** in  $\text{CDCl}_3$ .

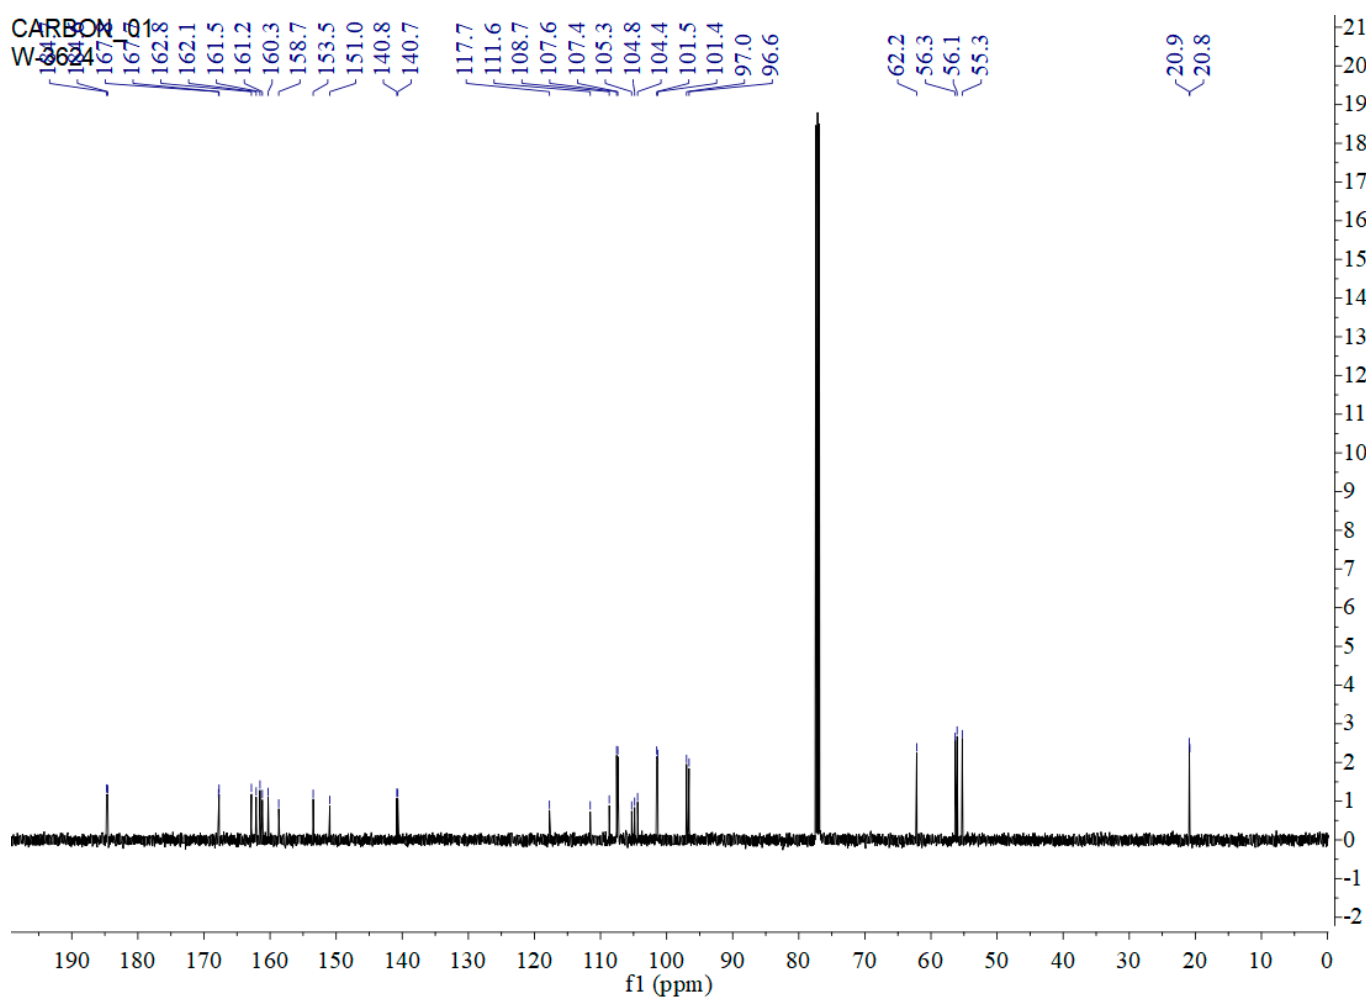

**Figure S21.**  $^{13}\text{C}$  NMR spectrum (125 MHz) of compound **2** in  $\text{CDCl}_3$ .

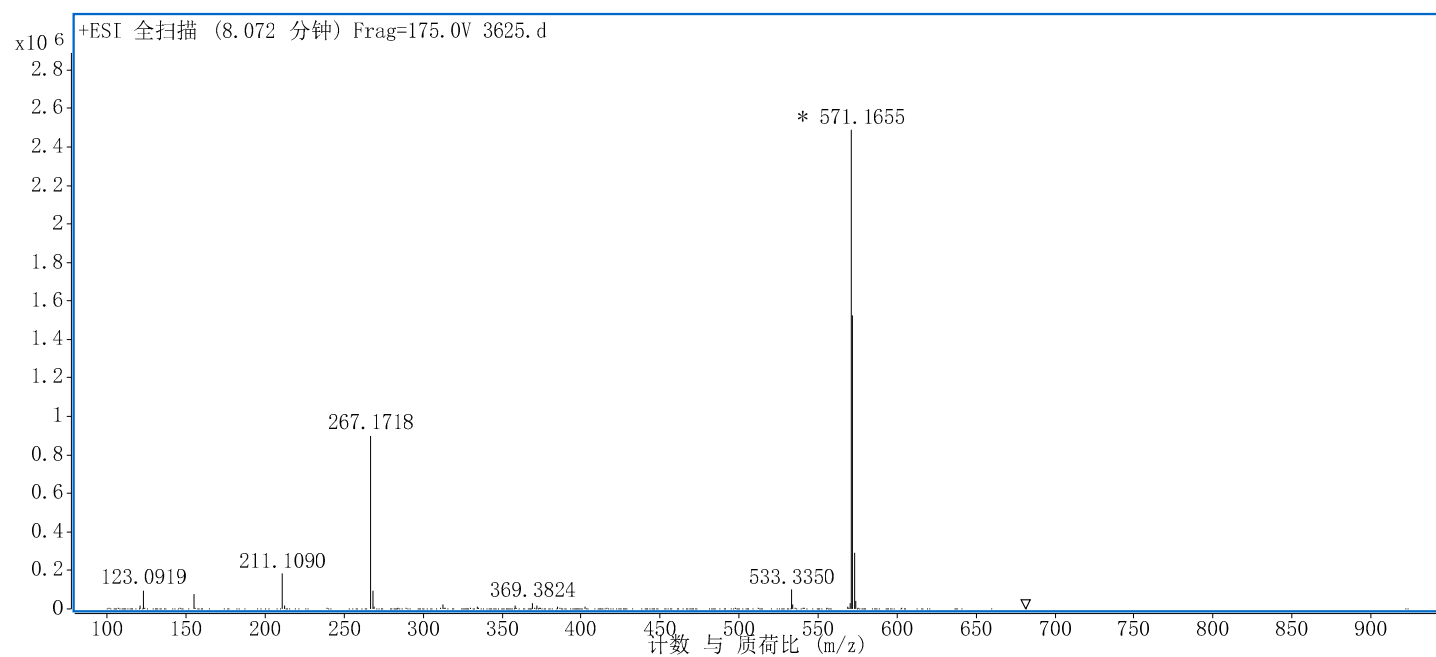

Figure S22. HRESIMS spectrum of compound 2.

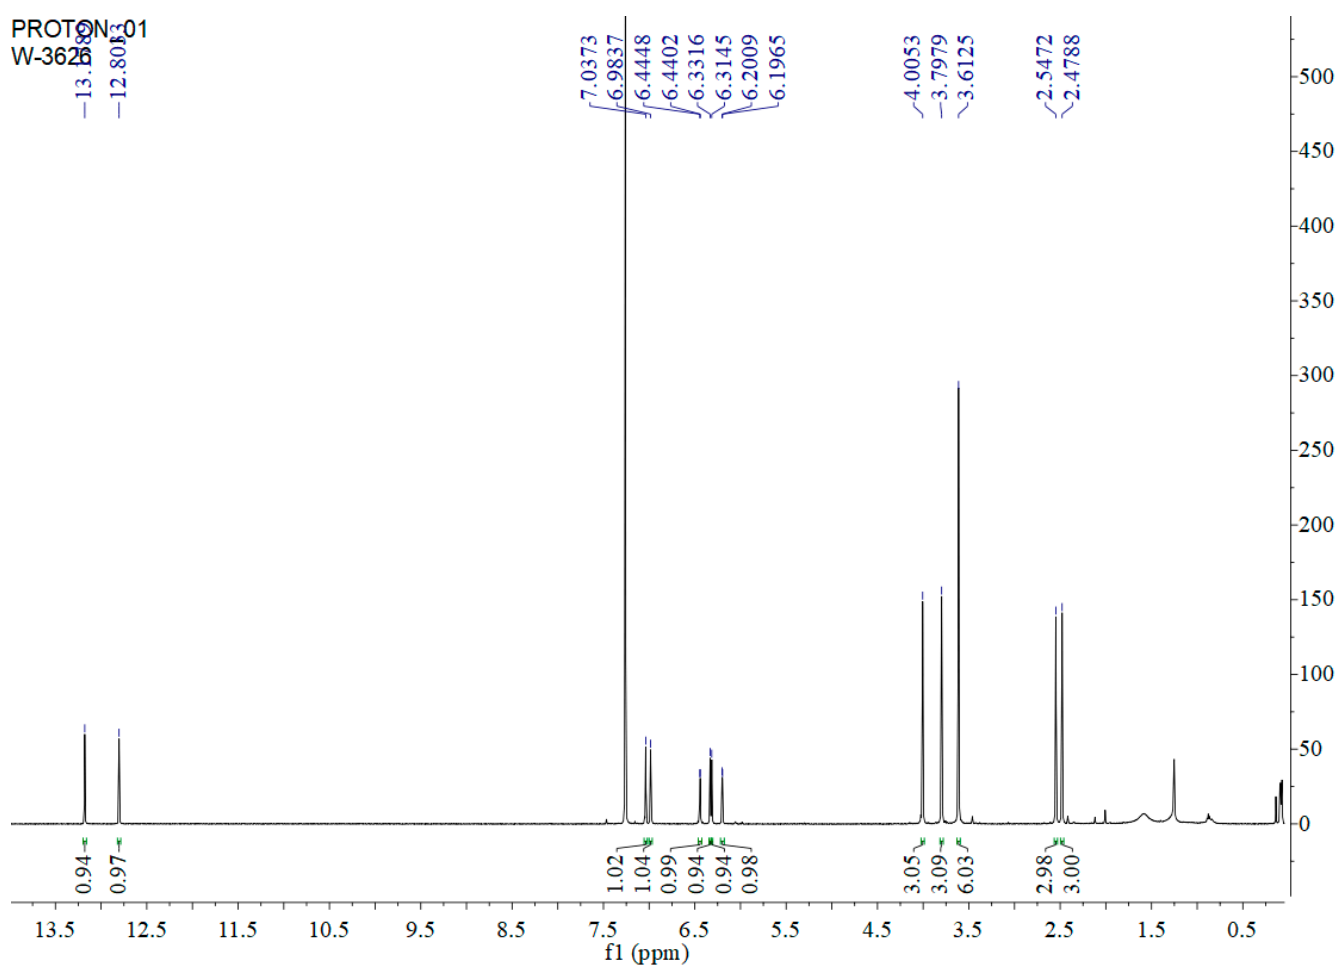

Figure S23.  $^1\text{H}$  NMR spectrum (500 MHz) of compound 3 in  $\text{CDCl}_3$ .



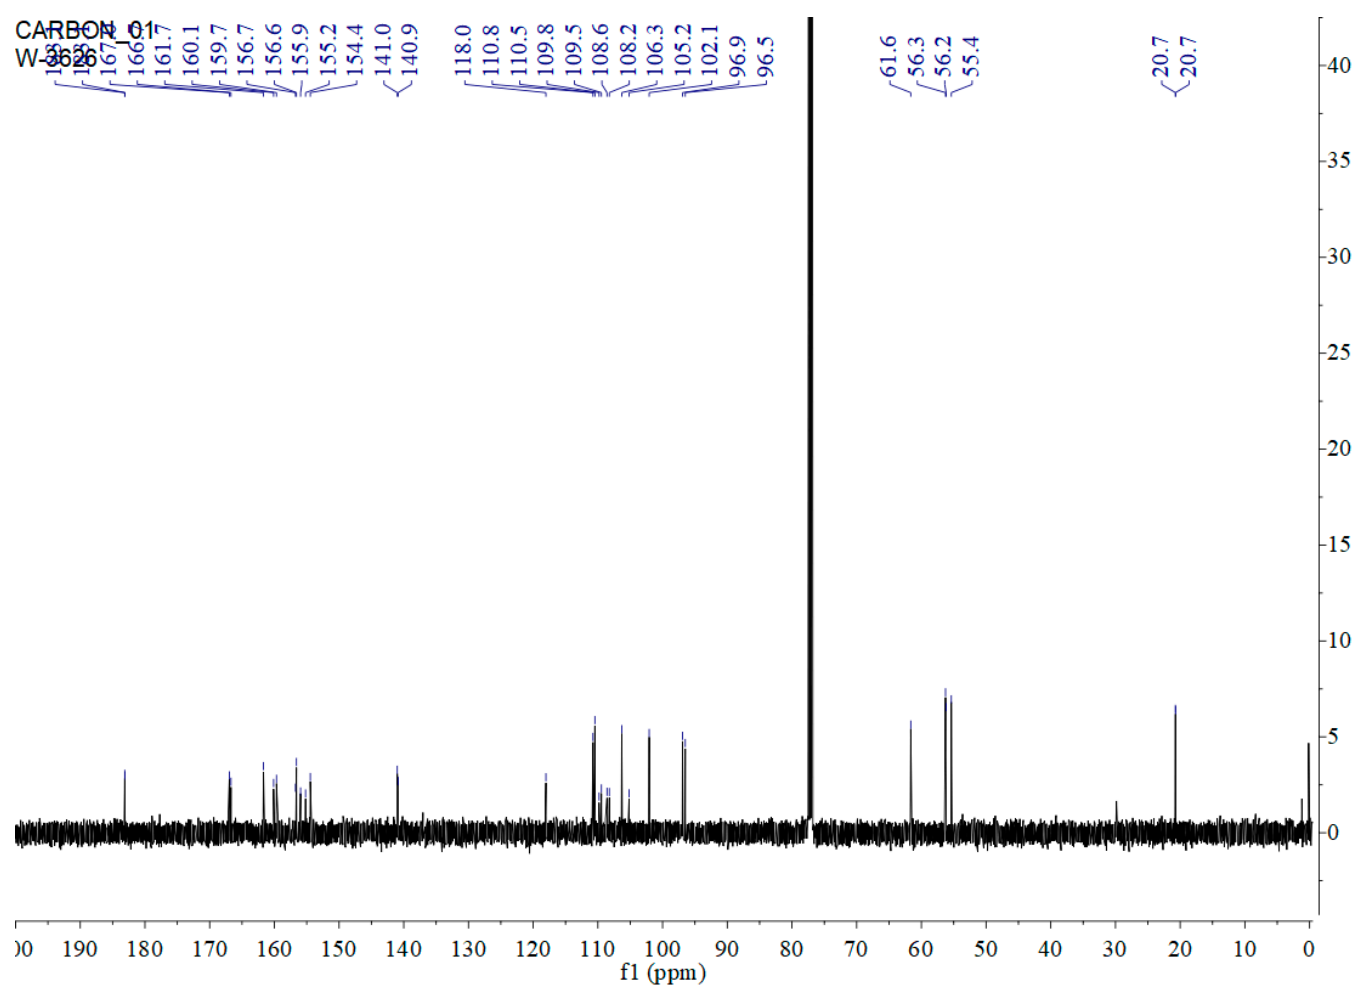

Figure S24.  $^{13}\text{C}$  NMR spectrum (125 MHz) of compound **3** in  $\text{CDCl}_3$ .

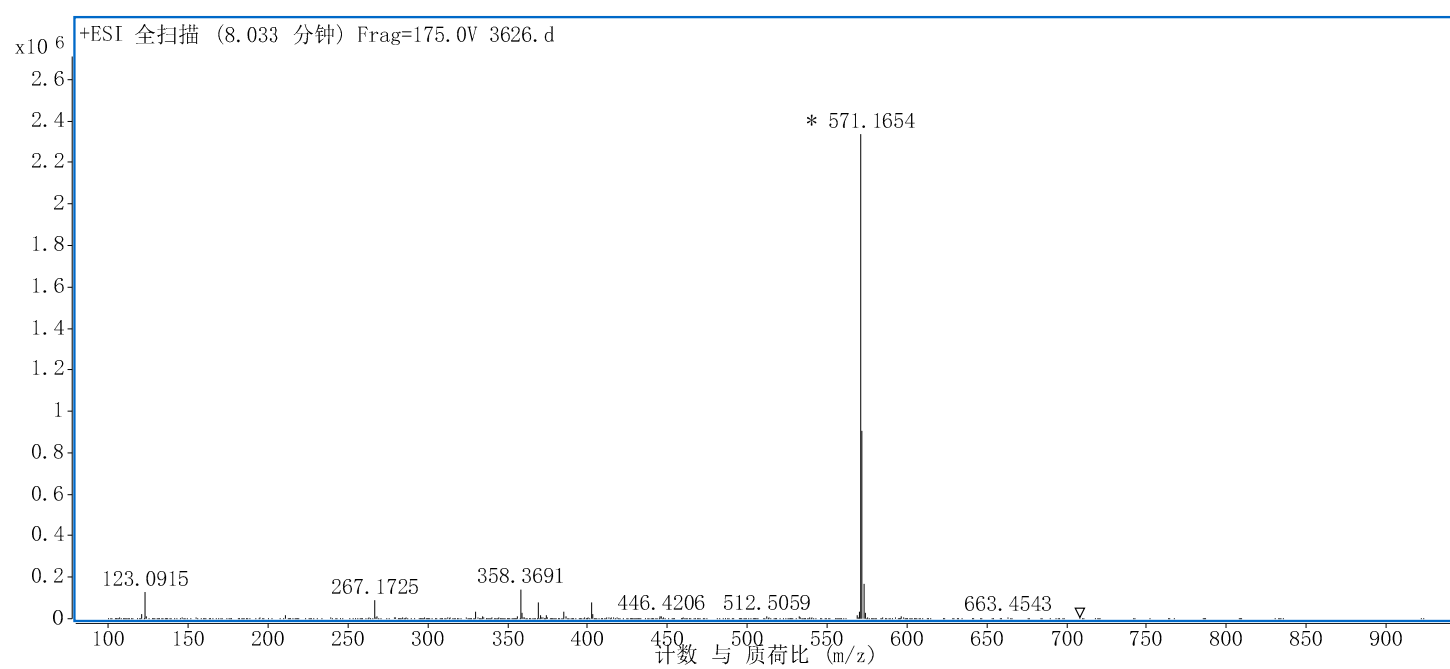

**Figure S25.** HRESIMS spectrum of compound **3**.

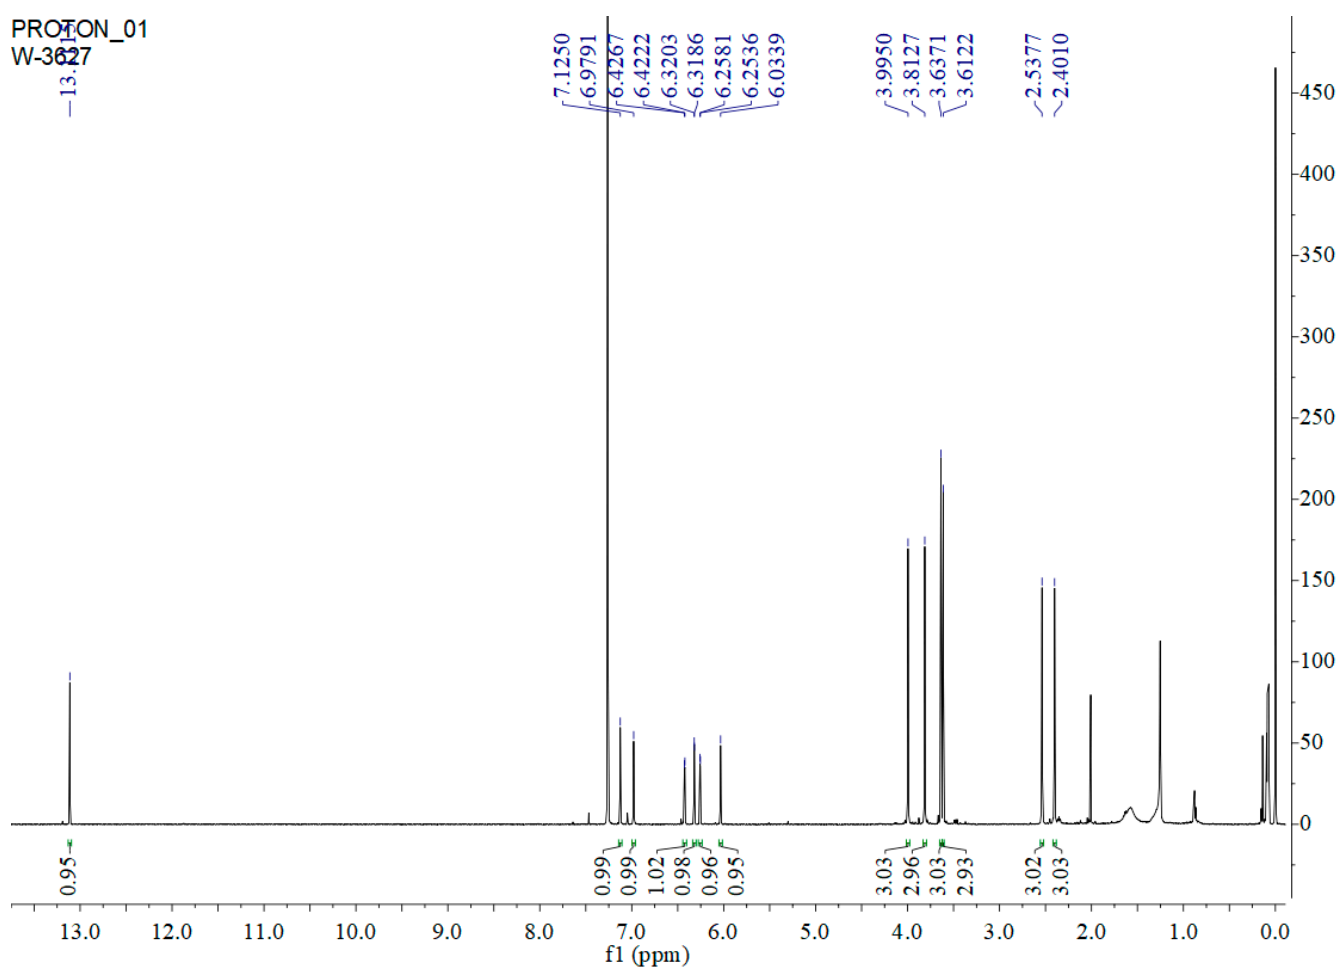

Figure S26.  $^1\text{H}$  NMR spectrum (500 MHz) of compound **4** in  $\text{CDCl}_3$ .

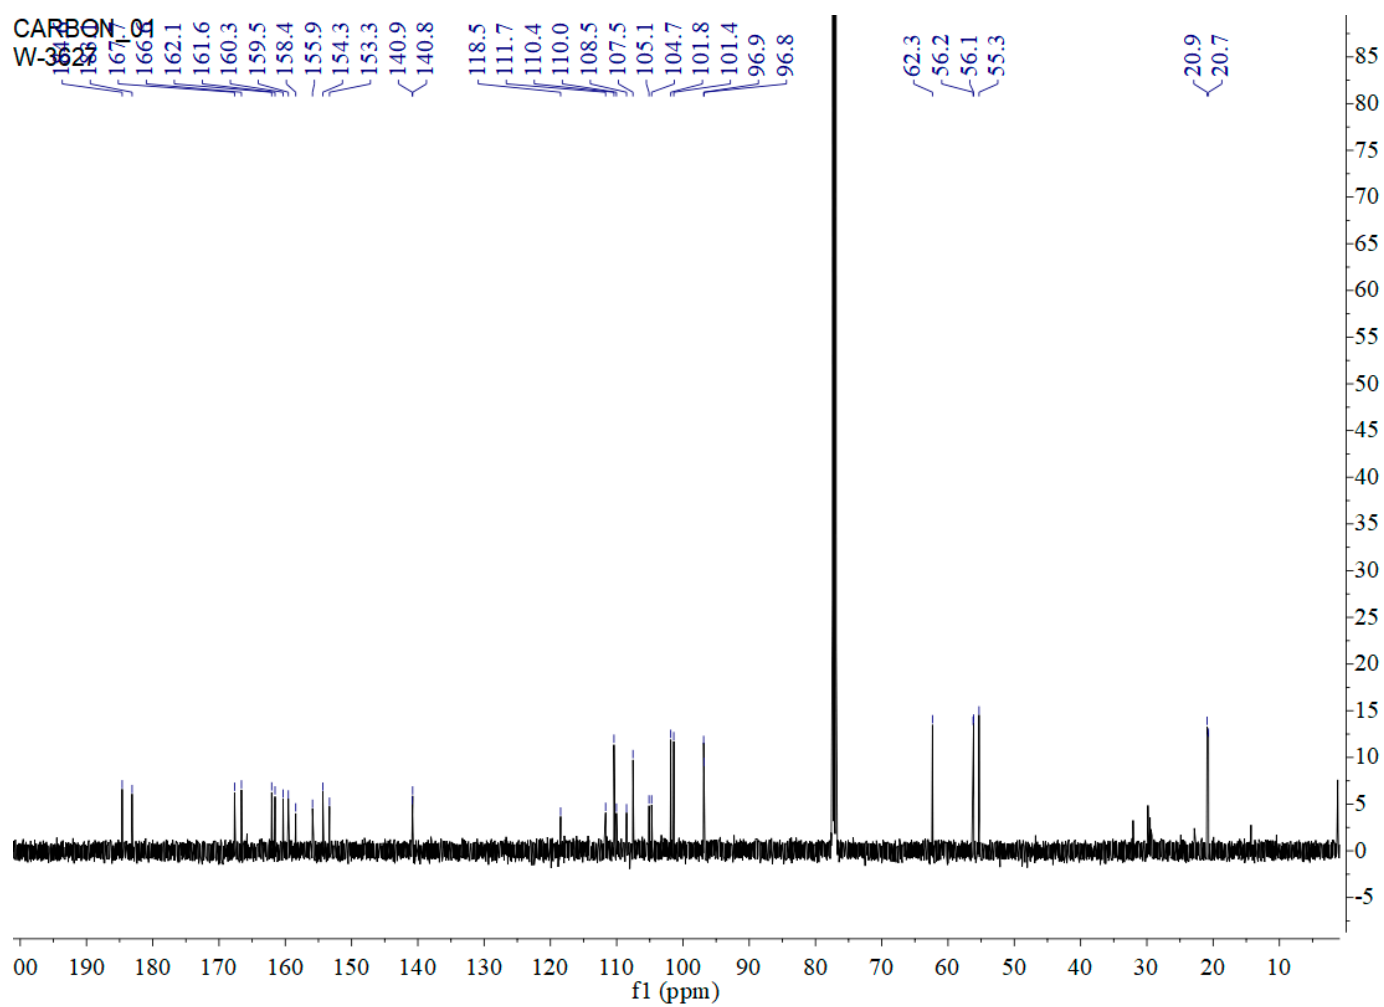

**Figure S27.**  $^{13}\text{C}$  NMR spectrum (125 MHz) of compound **4** in  $\text{CDCl}_3$ .

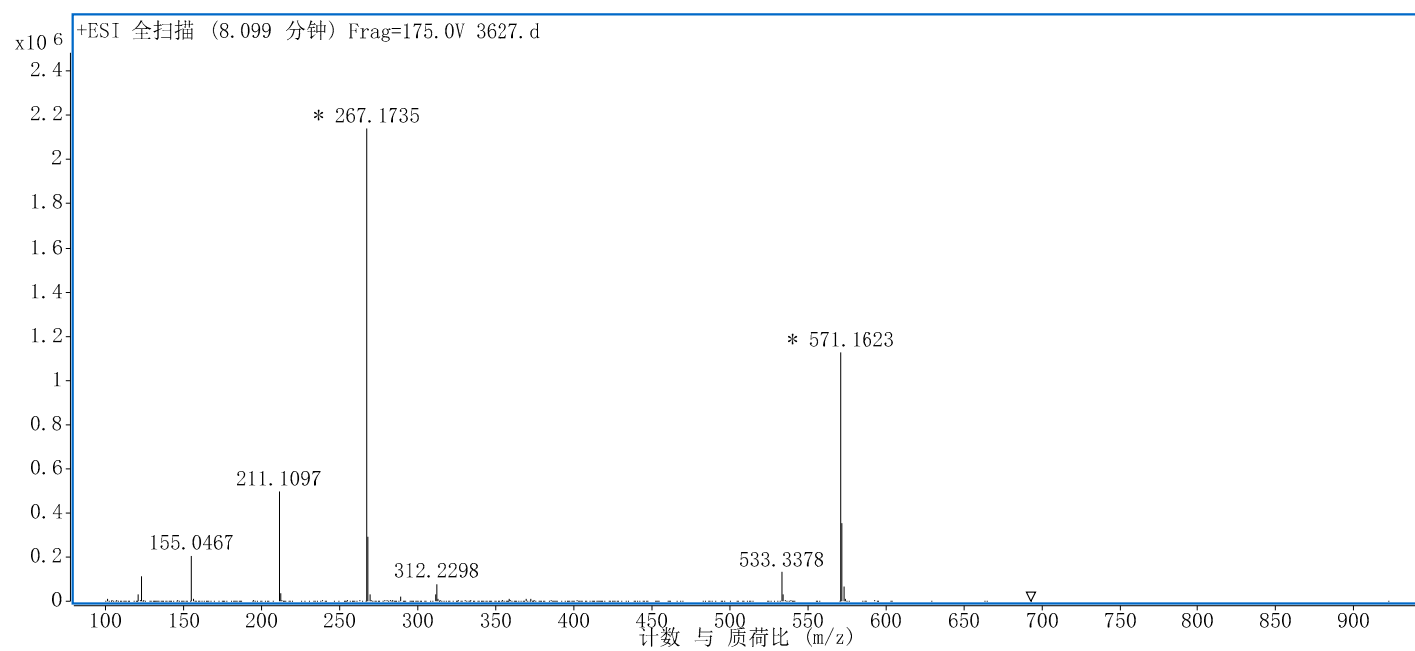

Figure S28. HRESIMS spectrum of compound 4.

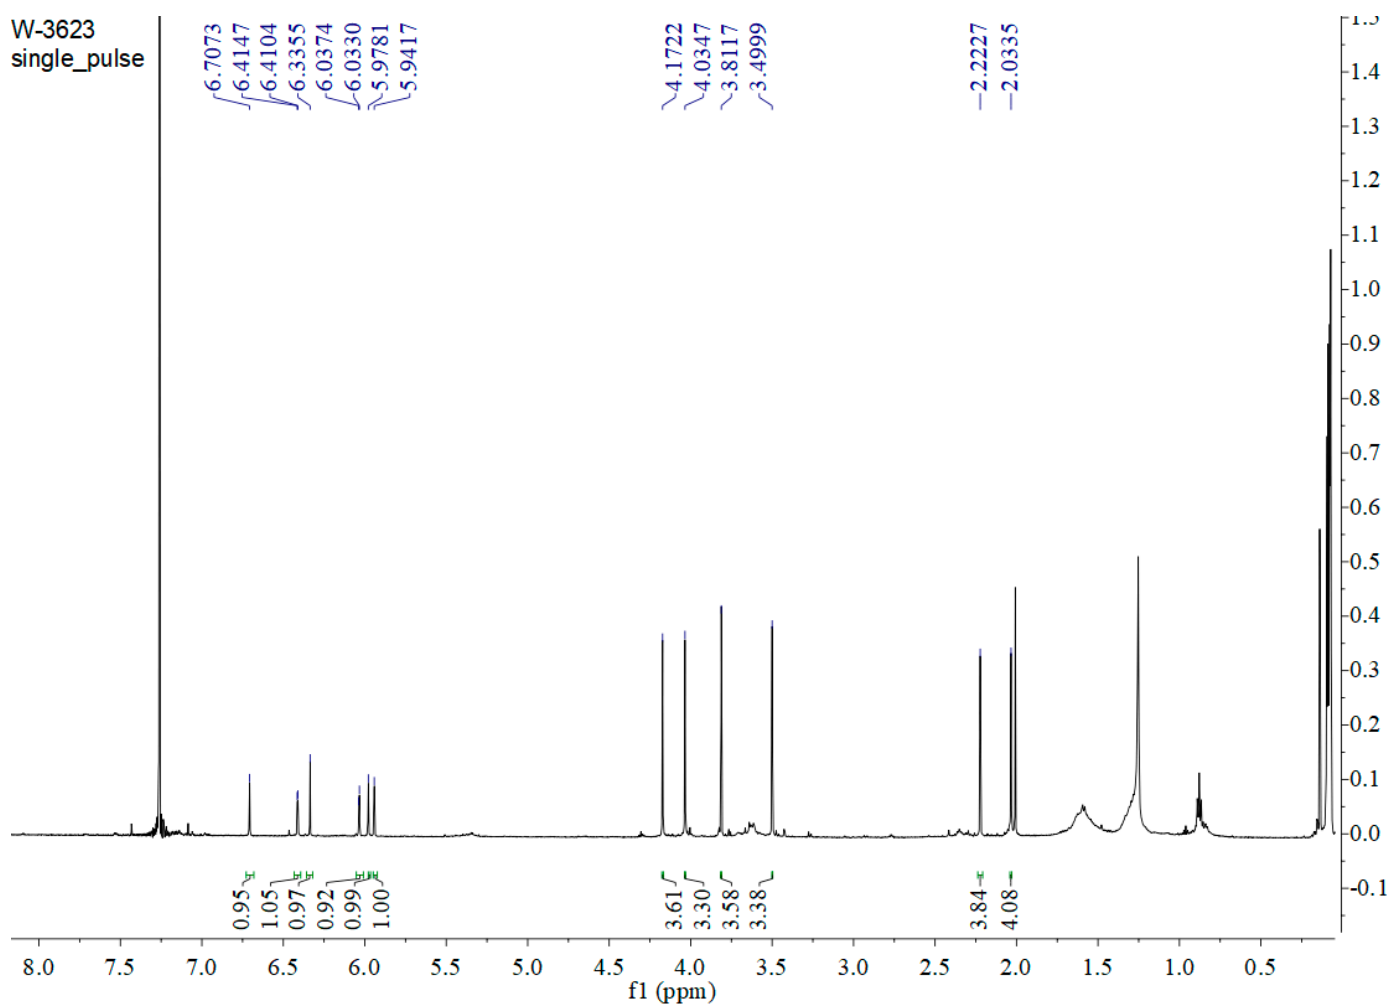

Figure S29.  $^1\text{H}$  NMR spectrum (600 MHz) of compound **5** in  $\text{CDCl}_3$ .

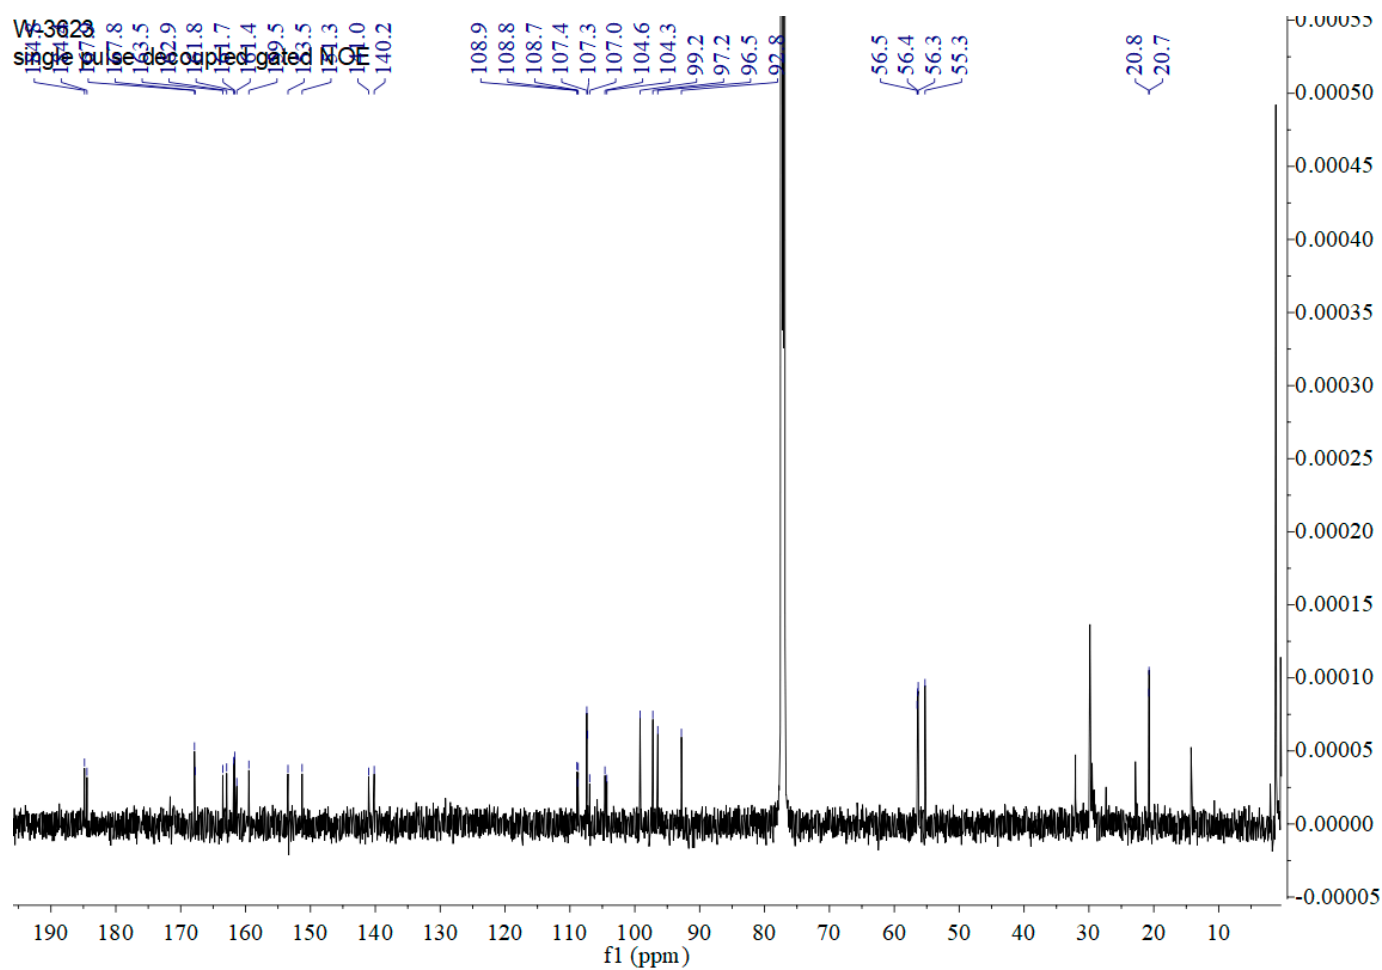

Figure S30.  $^{13}\text{C}$  NMR spectrum (150 MHz) of compound **5** in  $\text{CDCl}_3$ .

20210119-W3623\_210118123729 #75-76 RT: 0.61-0.62 AV: 2 SB: 20 0.04-0.20 NL: 1.58E7  
T: FTMS + p ESI Full ms [100.00-1500.00]

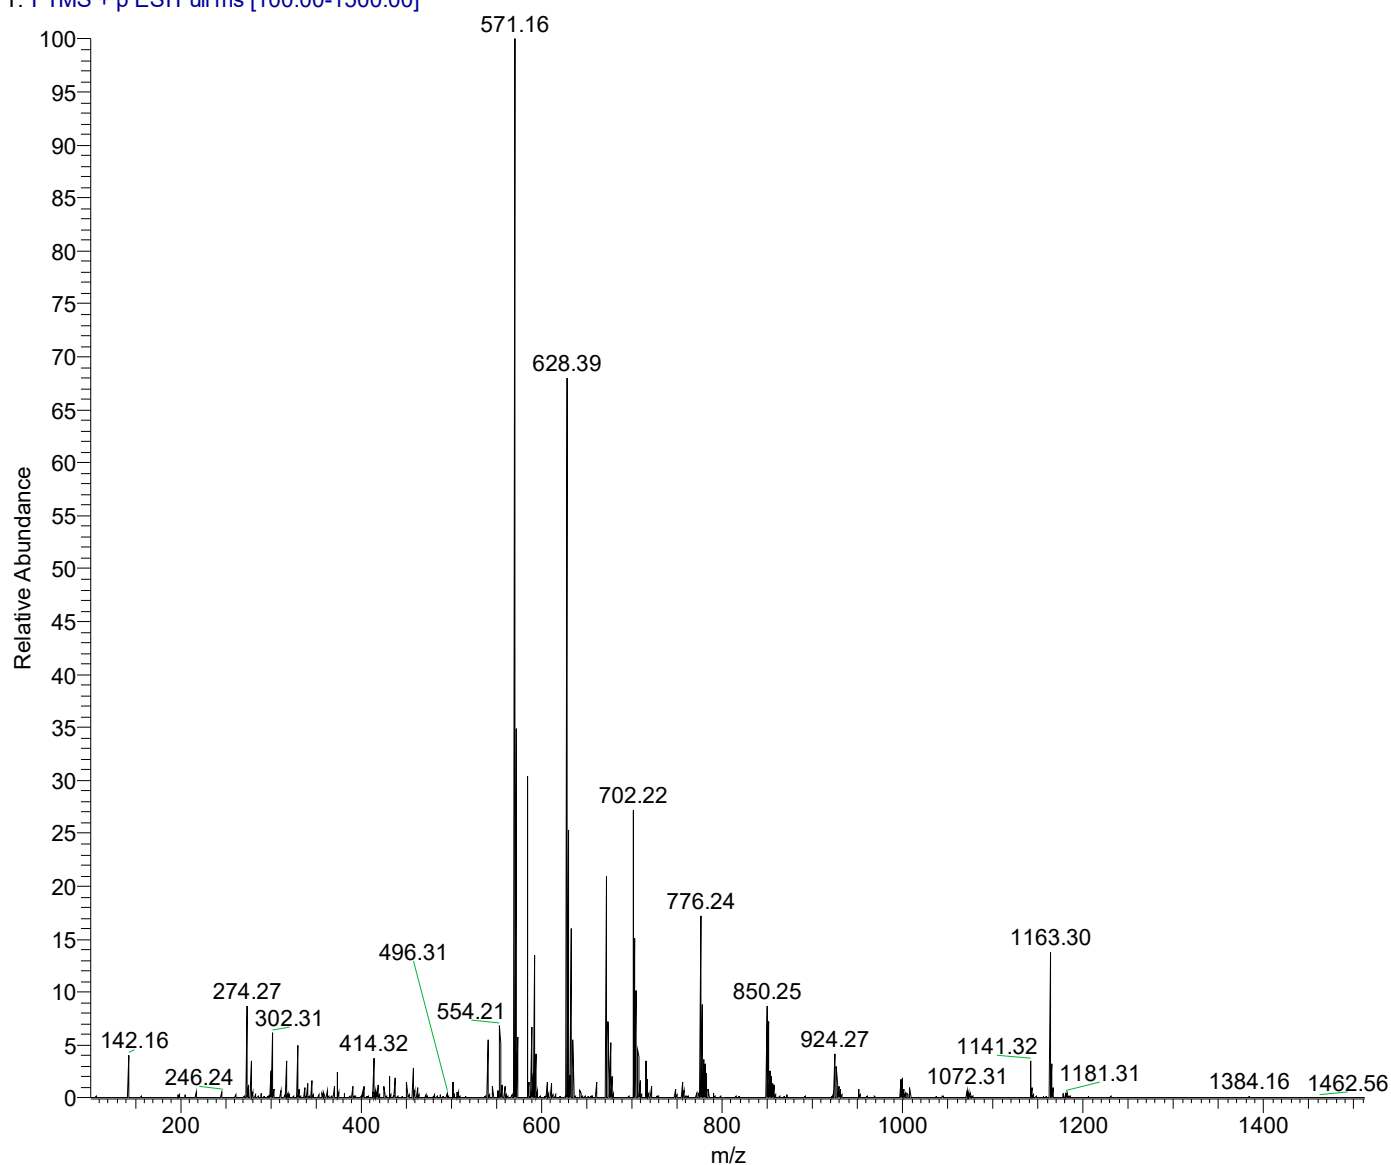

Figure S31. ESIMS spectrum of compound 5.



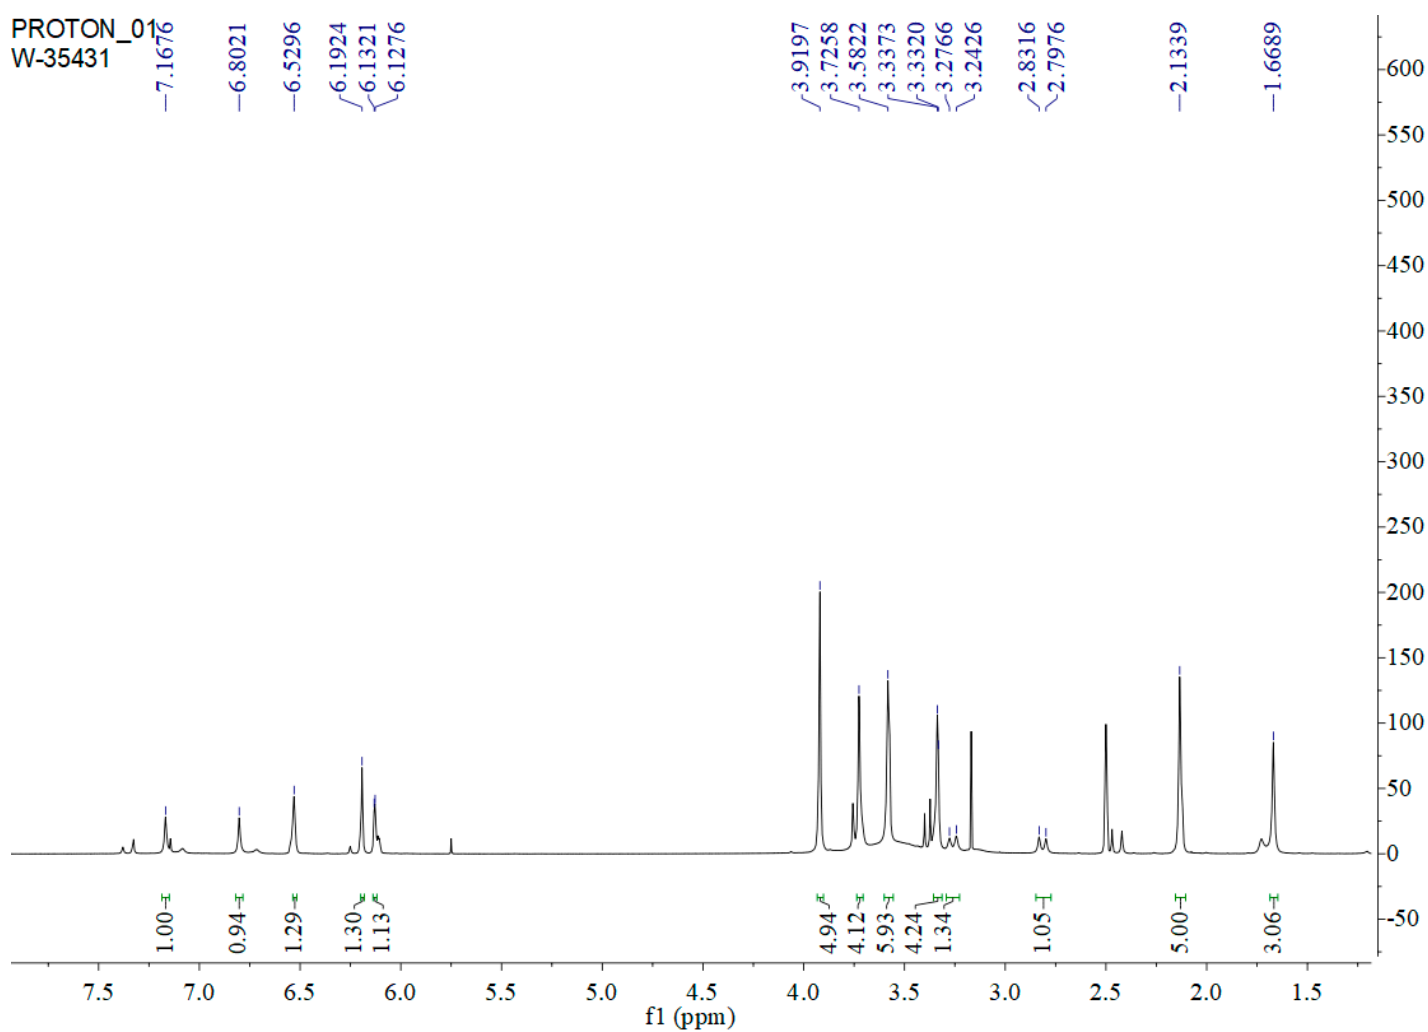

Figure S32.  $^1\text{H}$  NMR spectrum (500 MHz) of compound 6 in  $\text{DMSO-}d_6$ .

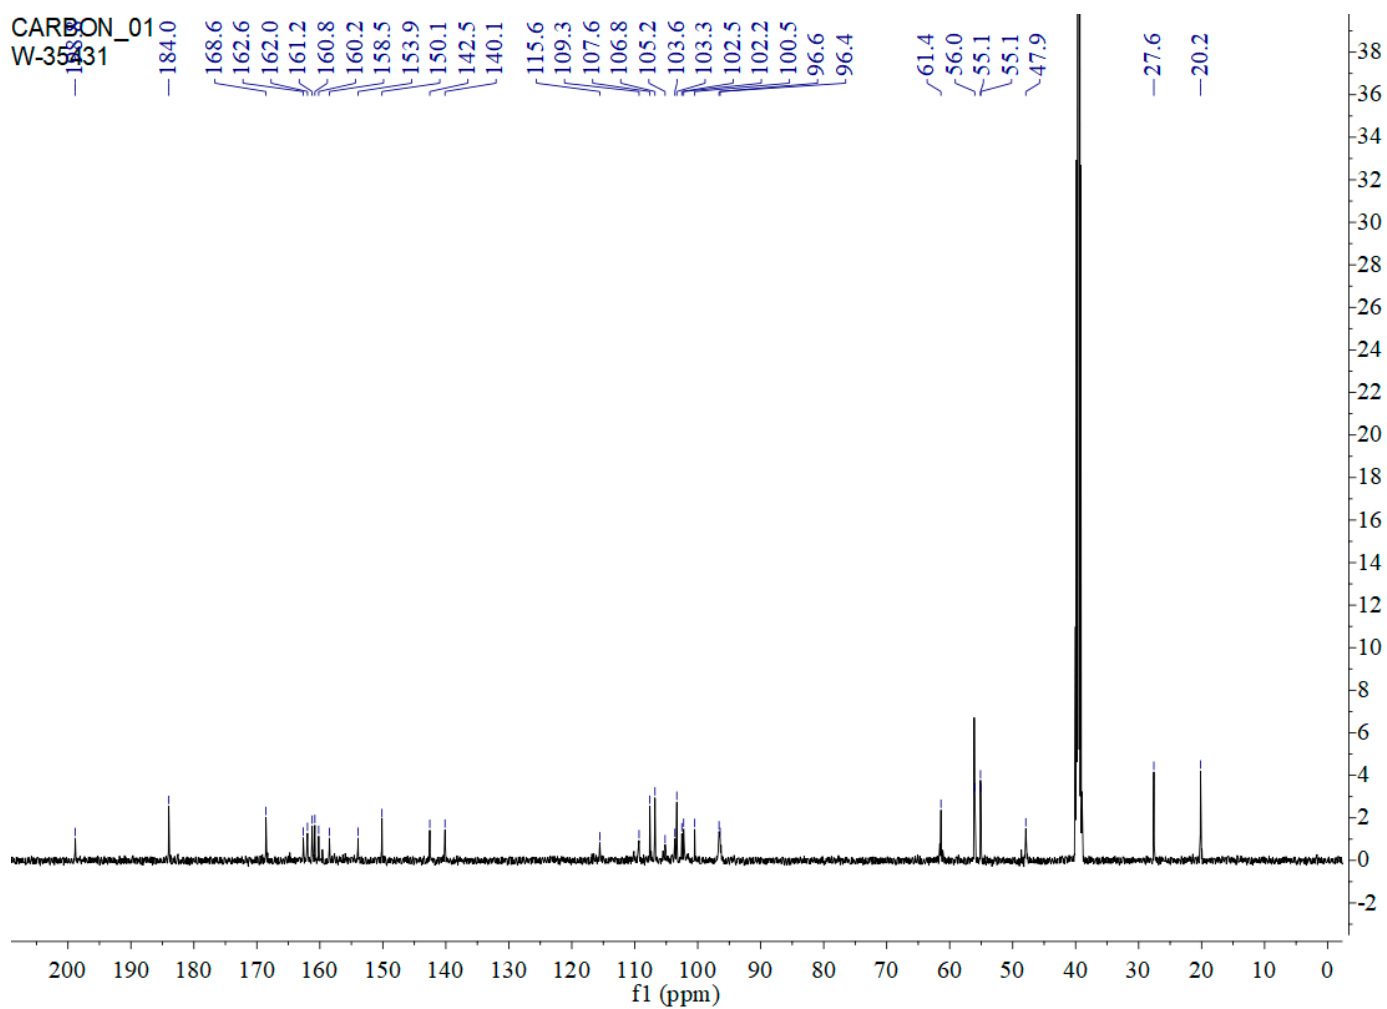

**Figure S33.**  $^{13}\text{C}$  NMR spectrum (125 MHz) of compound **6** in  $\text{DMSO-}d_6$ .

20210319-W35431\_210312090119 #52 RT: 0.41 AV: 1 NL: 1.77E7  
T: FTMS + p ESI Full ms [170.00-2000.00]

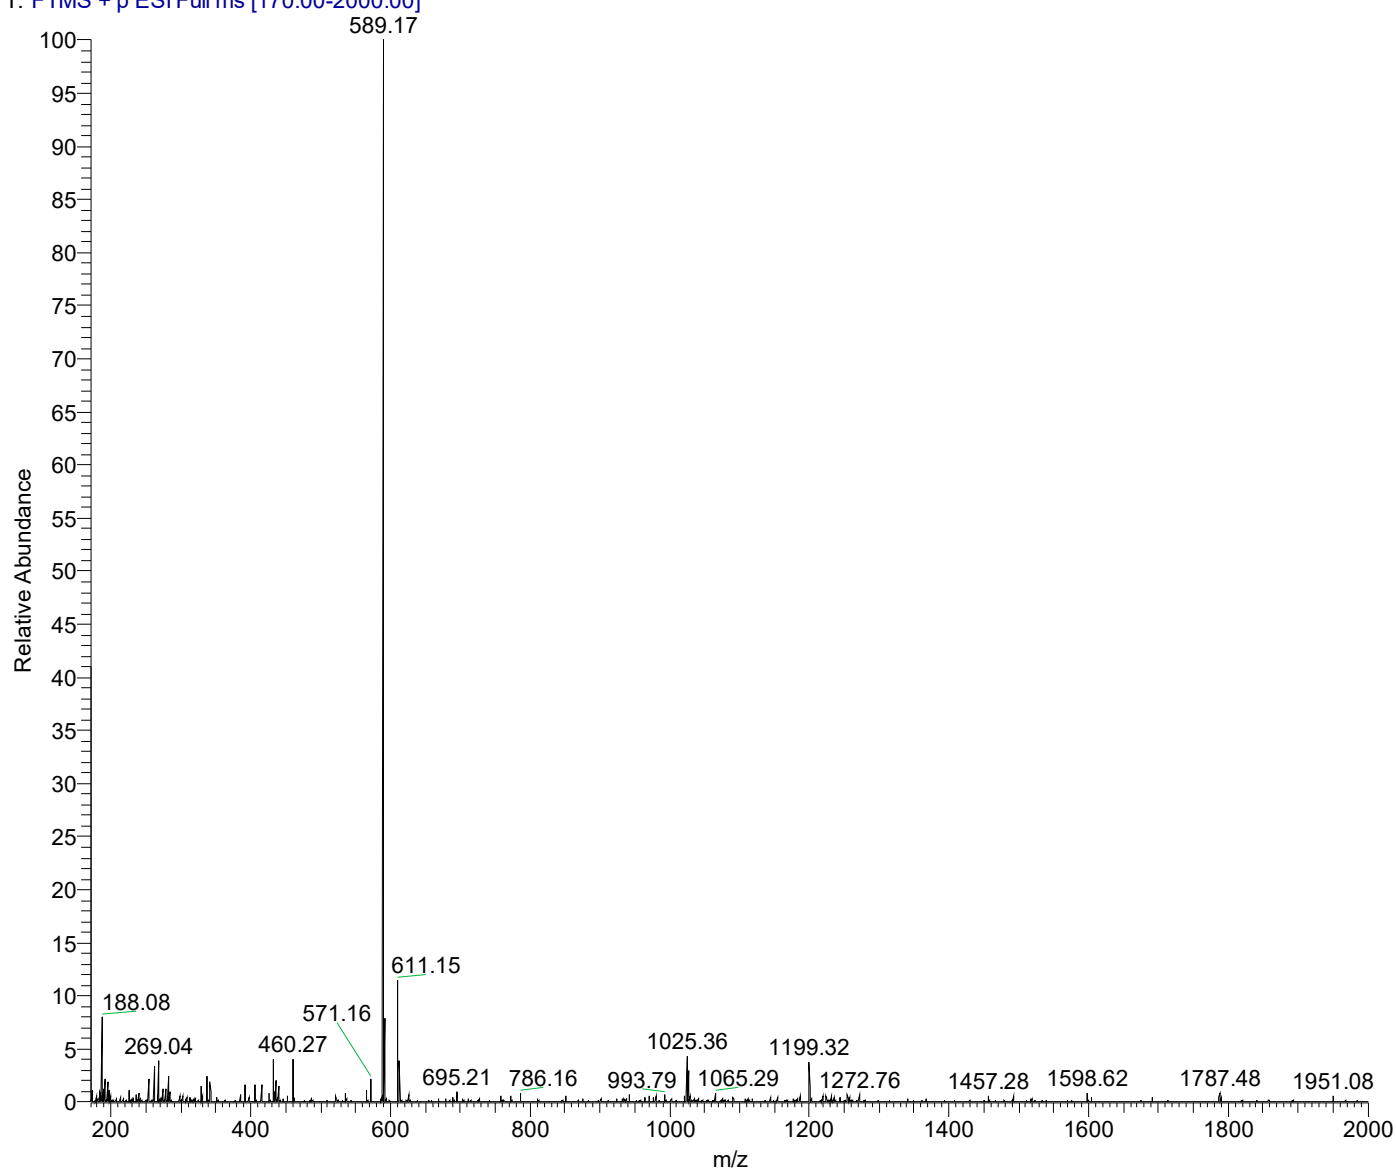

Figure S34. ESIMS spectrum of compound 6.

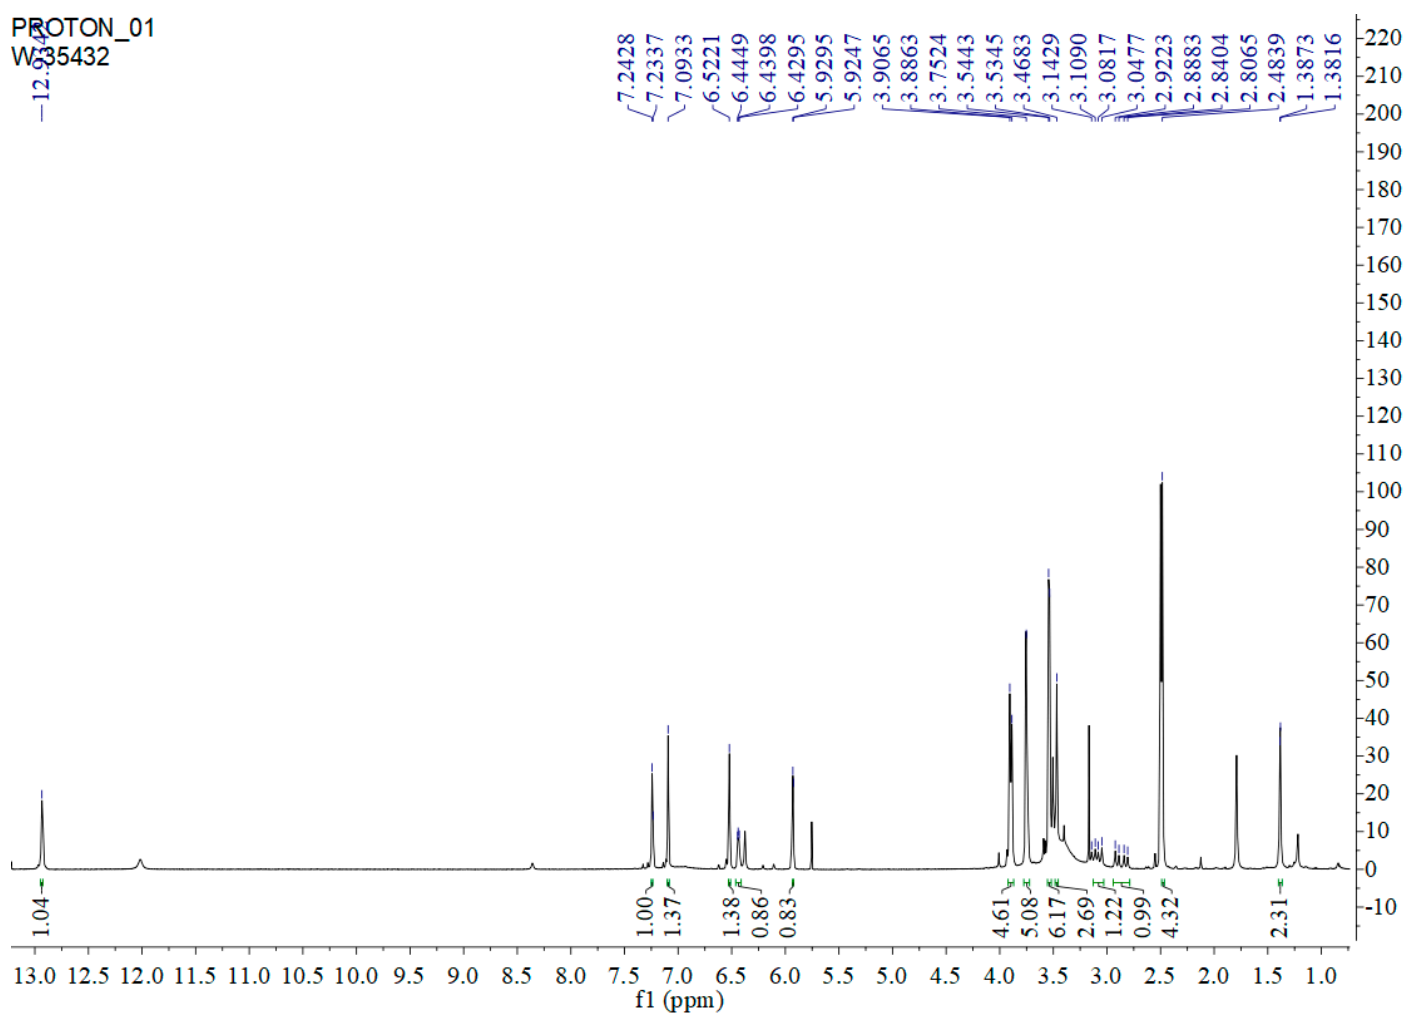

Figure S35.  $^1\text{H}$  NMR spectrum (500 MHz) of compound 7 in  $\text{DMSO-}d_6$ .

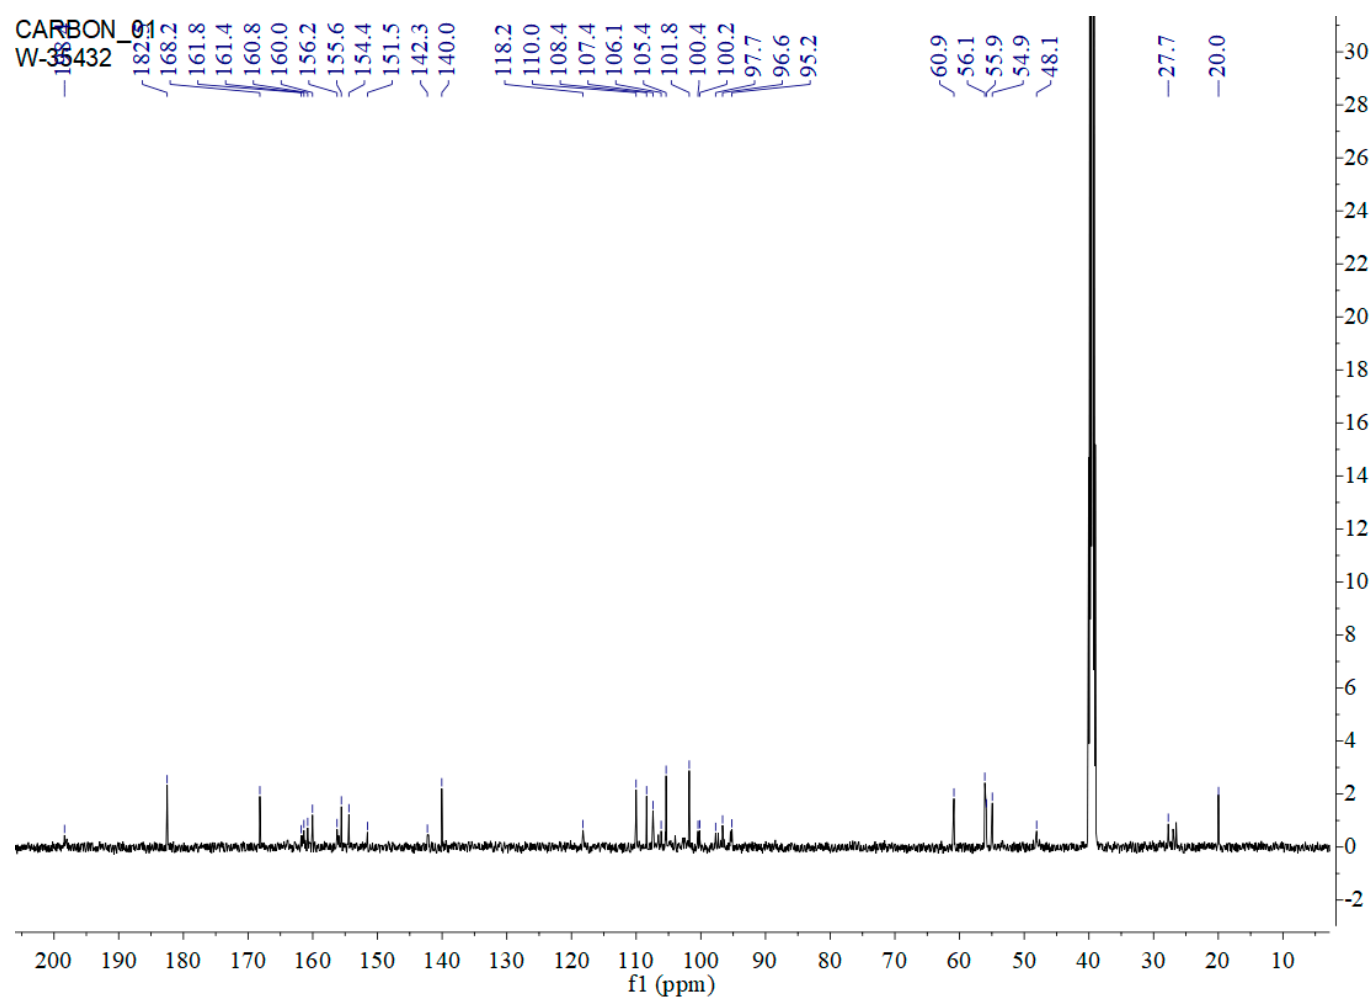

**Figure S36.**  $^{13}\text{C}$  NMR spectrum (125 MHz) of compound **7** in  $\text{DMSO-}d_6$ .

20210324-W-35432\_210324081104 #51-52 RT: 0.40-0.41 AV: 2 NL: 2.95E7  
T: FTMS + p ESI Full ms [200.00-1500.00]

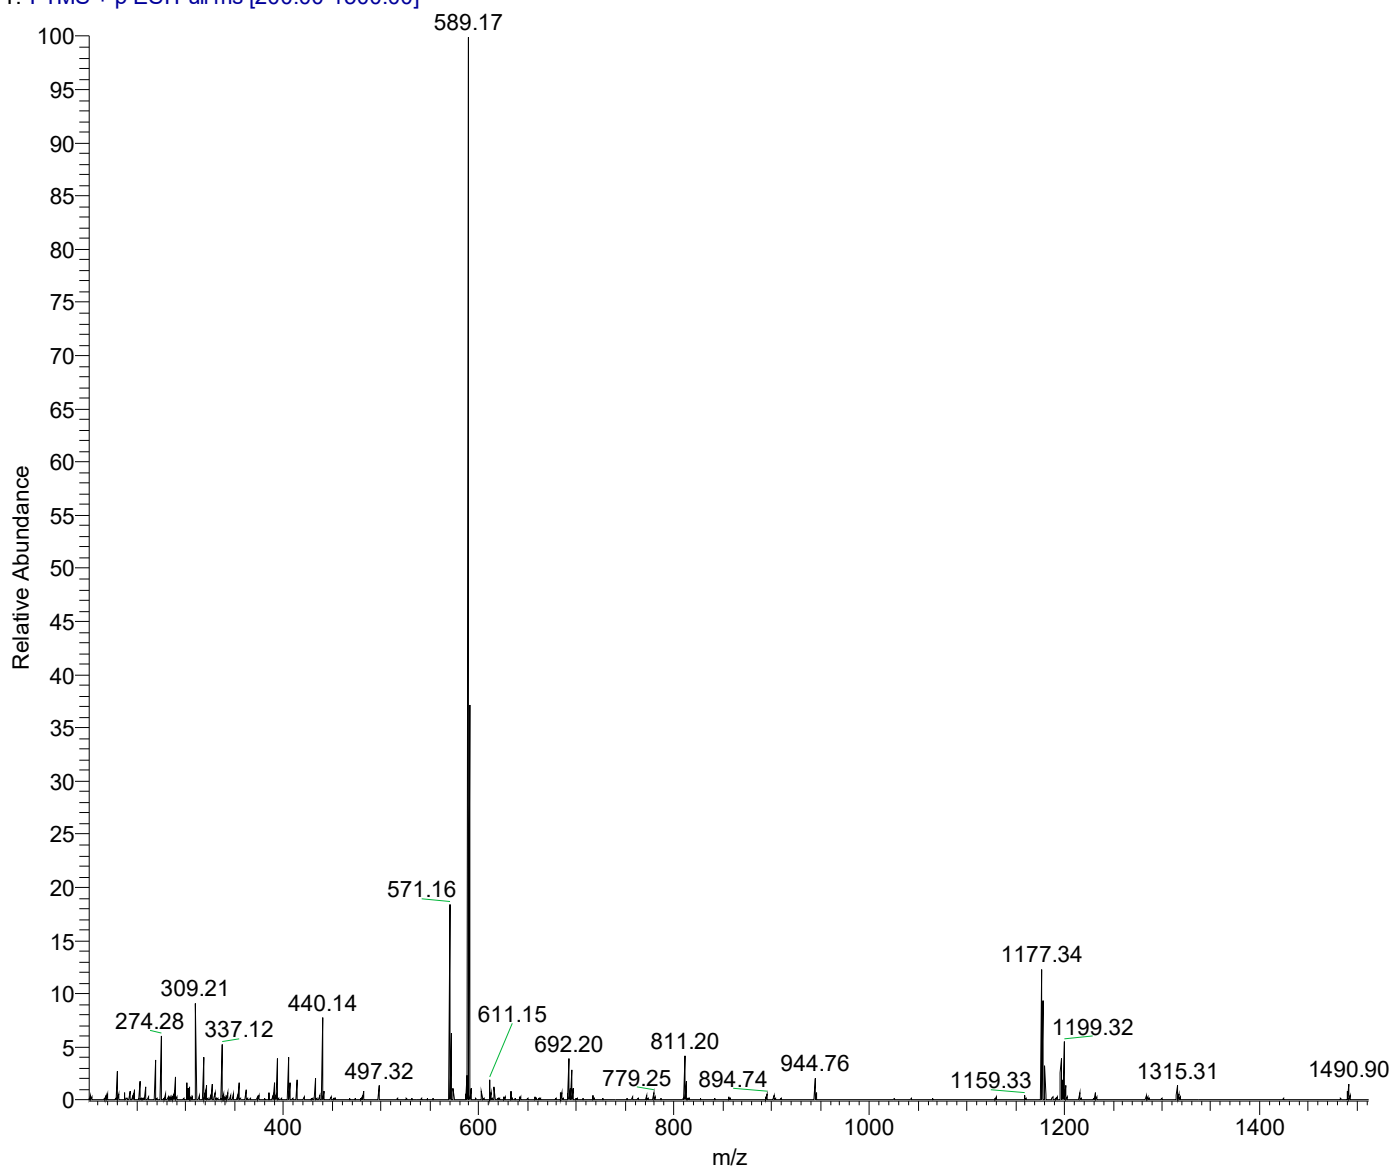

Figure S37. ESIMS spectrum of compound 7.

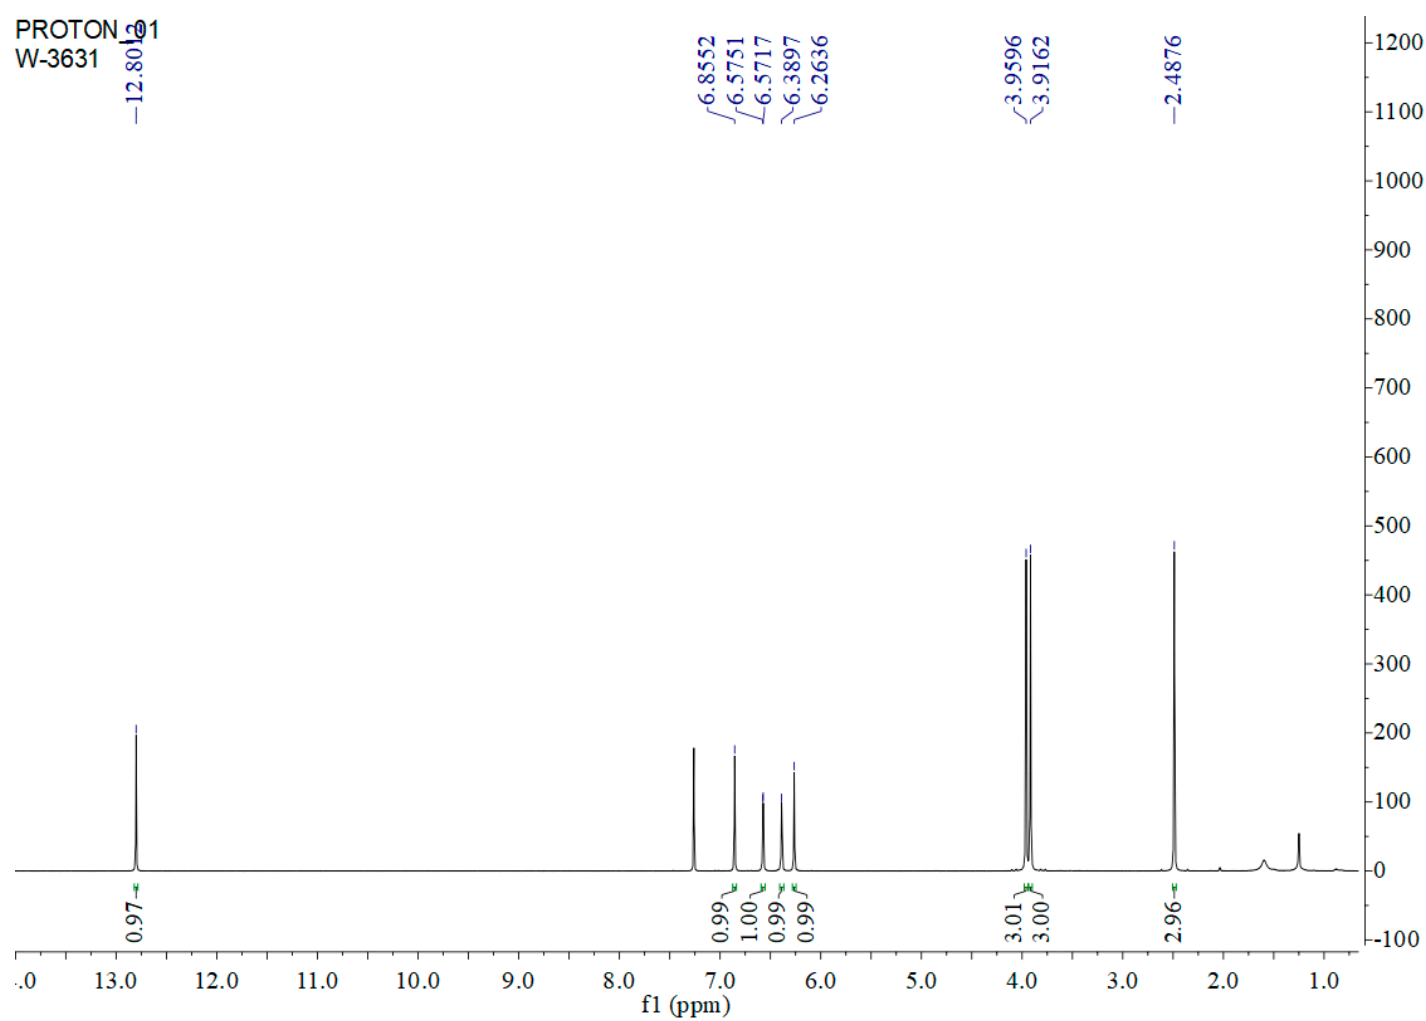

Figure S38.  $^1\text{H}$  NMR spectrum (500 MHz) of compound **8** in  $\text{CDCl}_3$ .

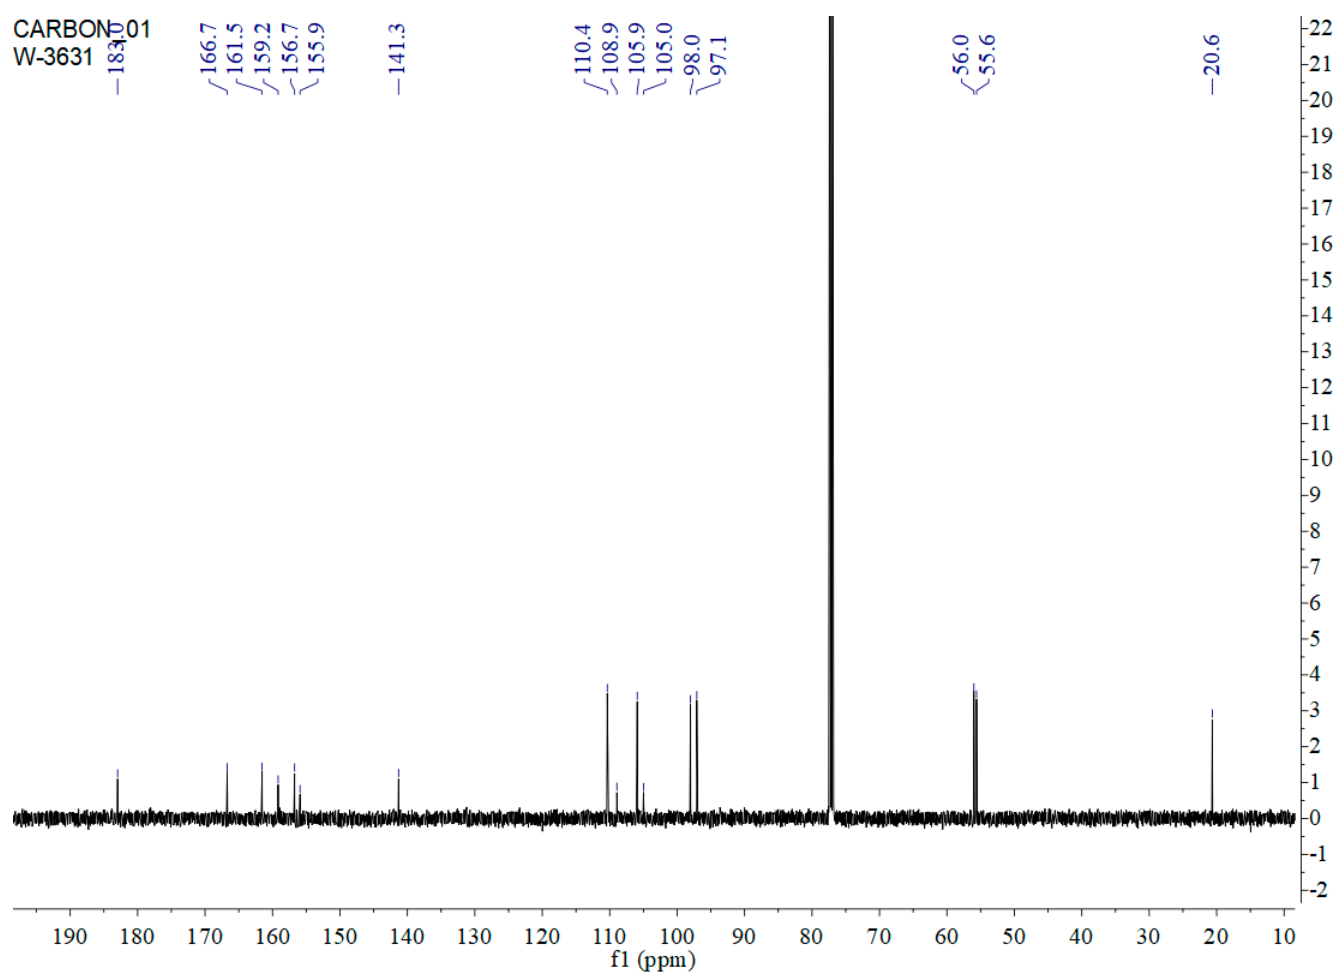

Figure S39.  $^{13}\text{C}$  NMR spectrum (125 MHz) of compound 8 in  $\text{CDCl}_3$ .



20201214-w3631\_201214081142 #58-59 RT: 0.83-0.84 AV: 2 SB: 22 0.00-0.31 NL: 1.75E7  
T: FTMS + p ESI Full ms [160.00-1200.00]

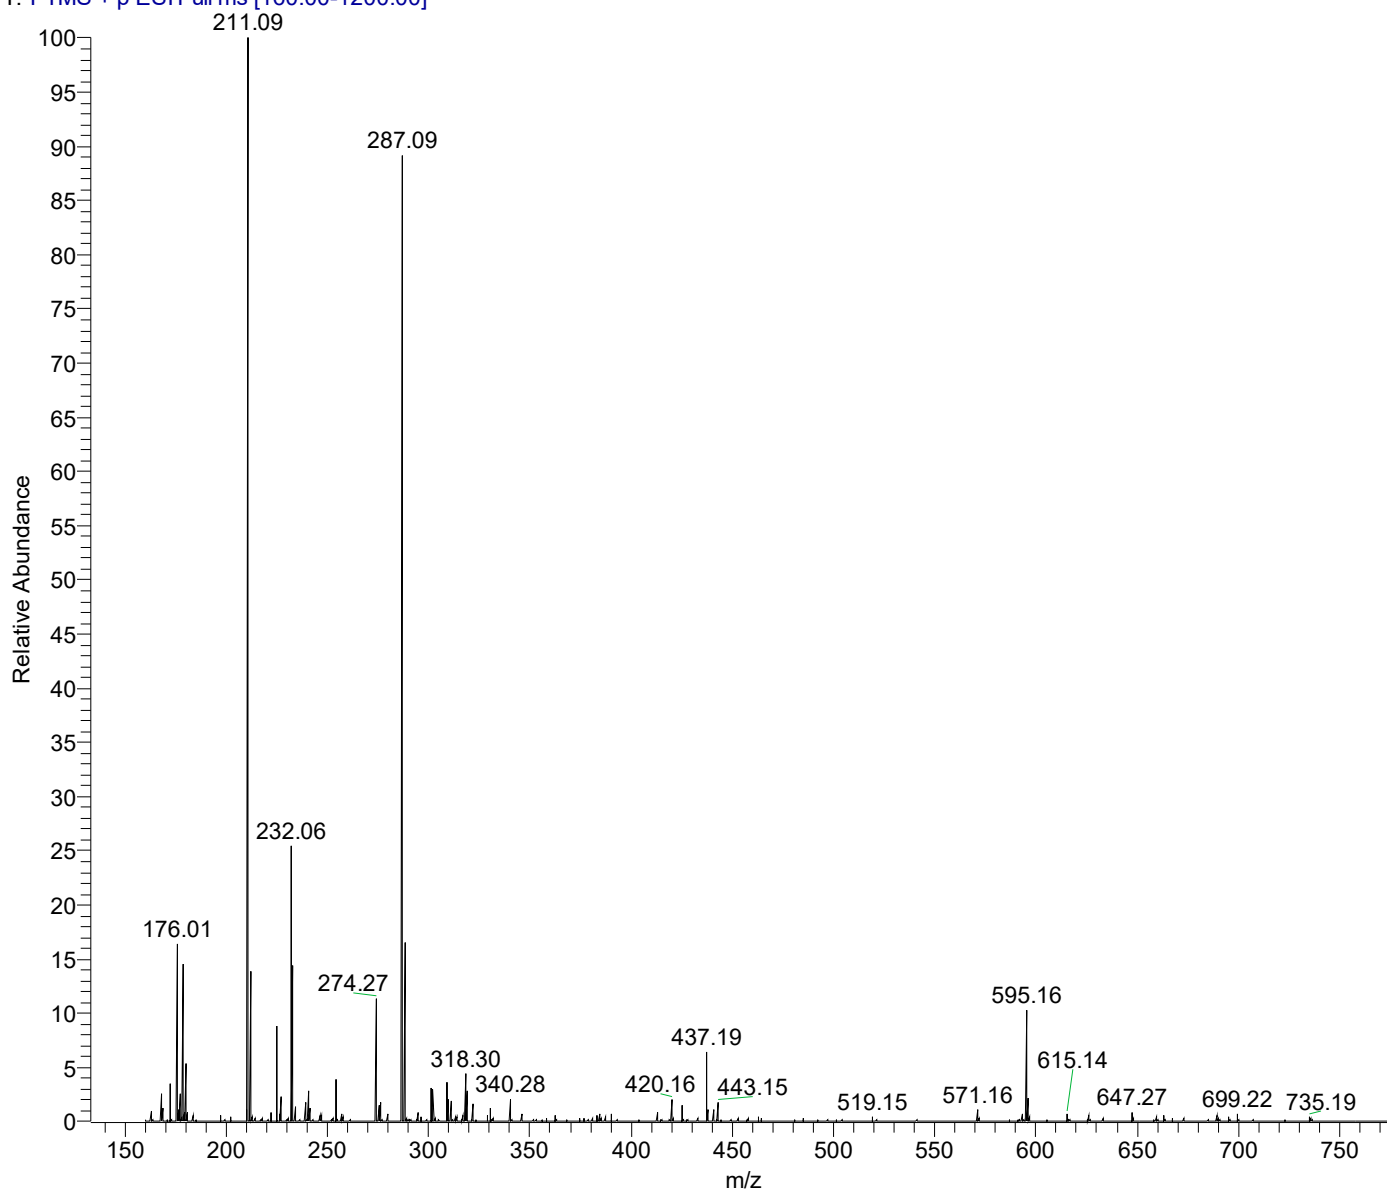

Figure S40. ESIMS spectrum of compound 8.

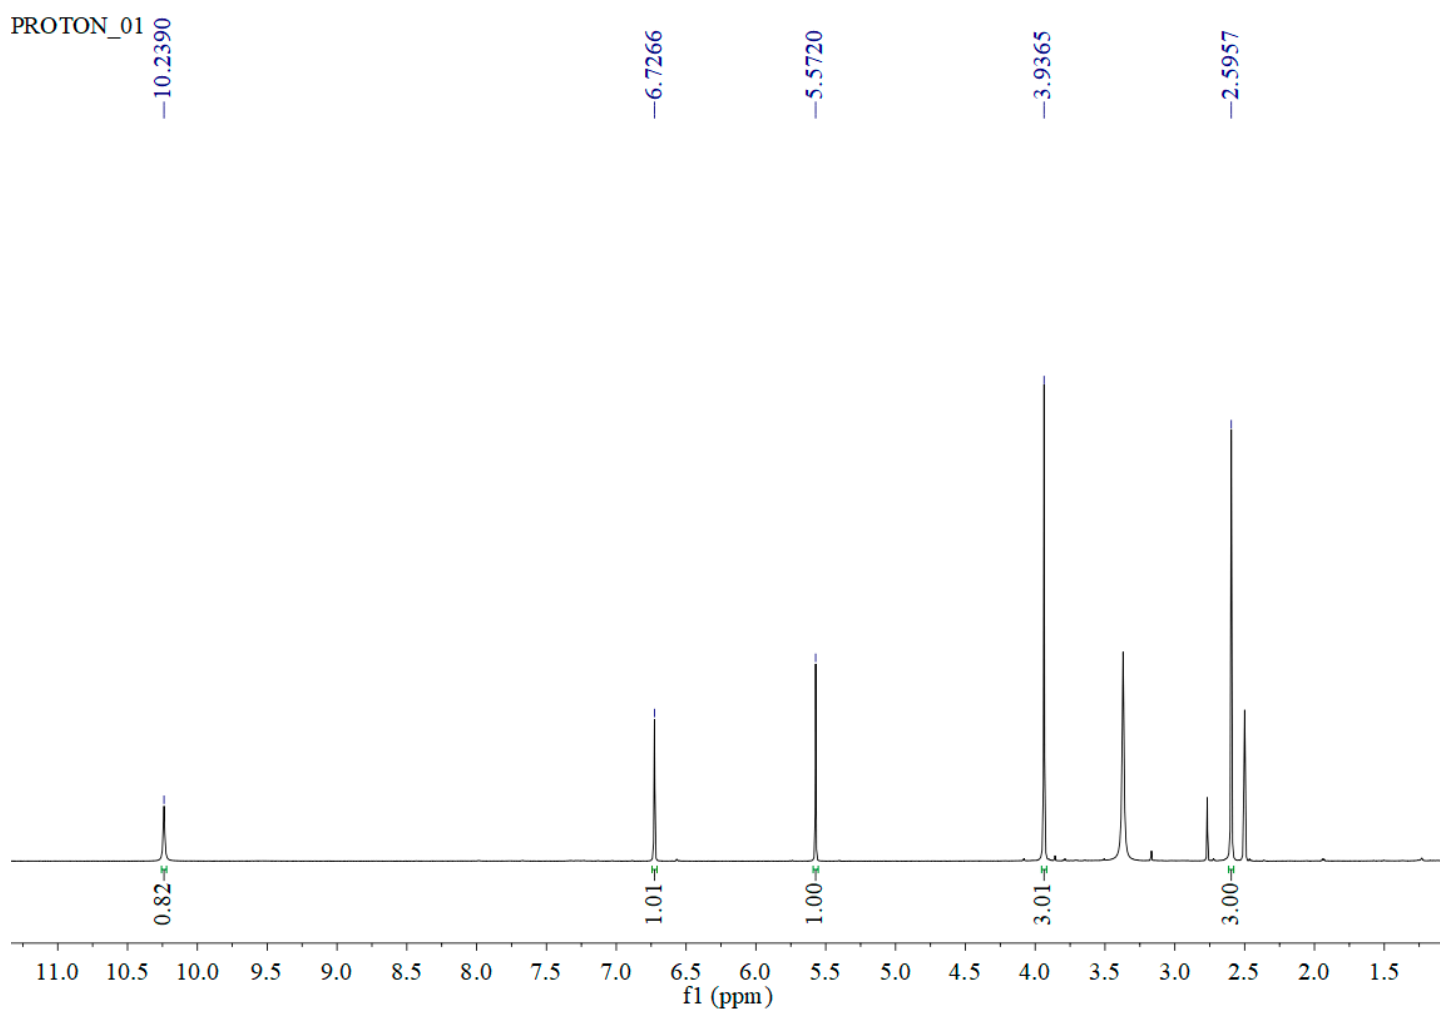

**Figure S41.**  $^1\text{H}$  NMR spectrum (500 MHz) of compound **9** in  $\text{DMSO-}d_6$ .

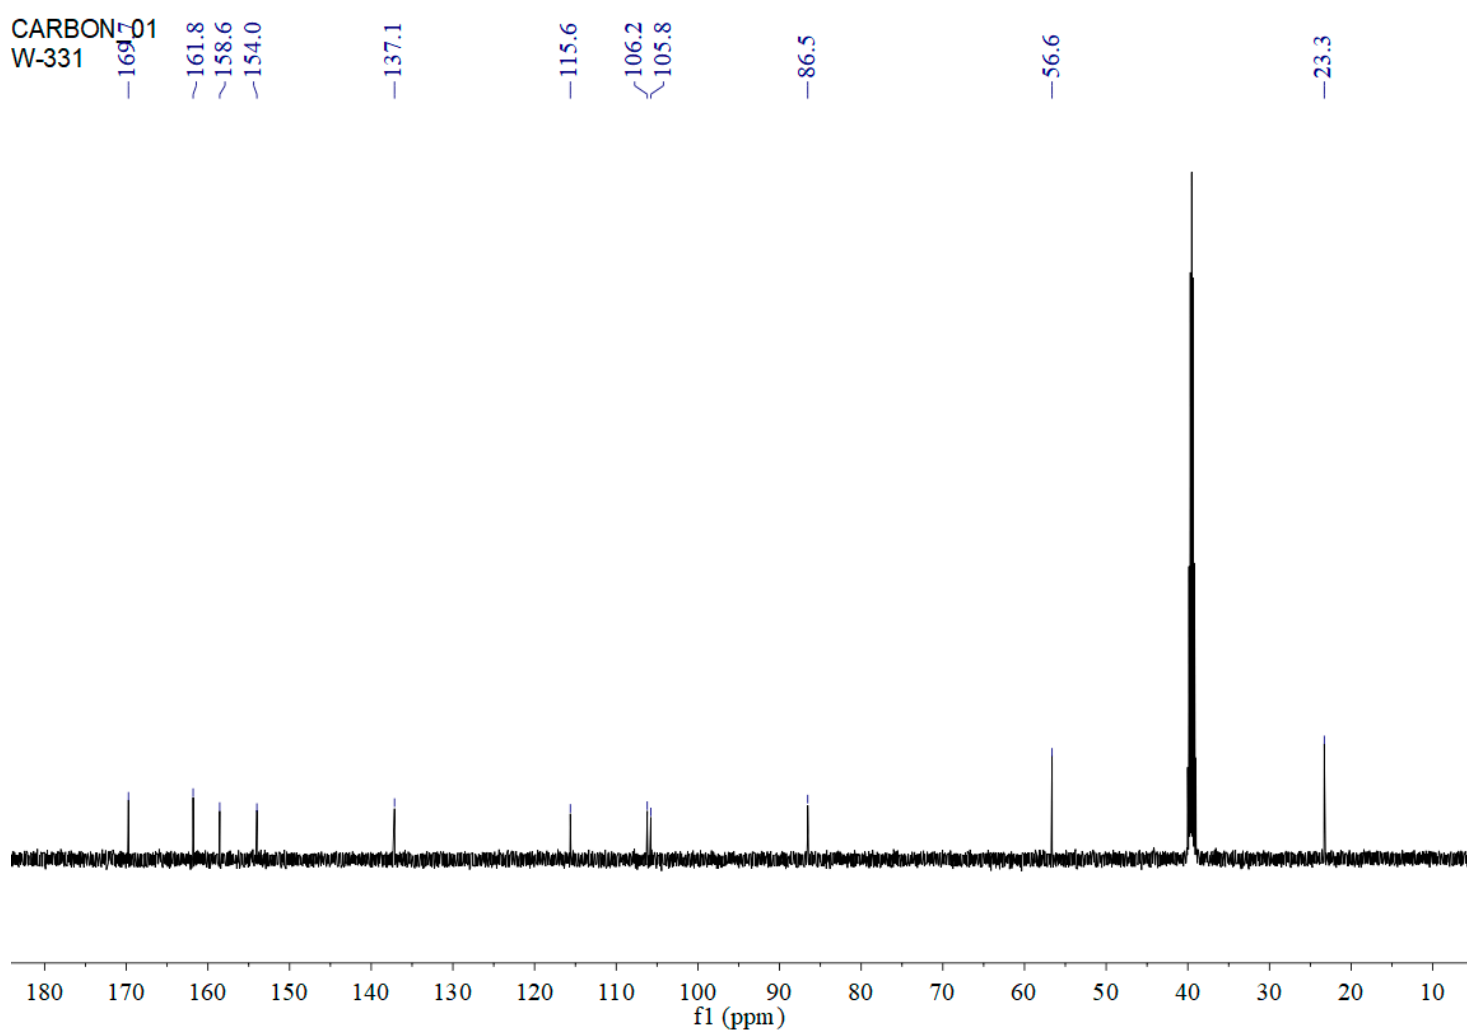

Figure S42.  $^{13}\text{C}$  NMR spectrum (125 MHz) of compound **9** in  $\text{DMSO-}d_6$ .

20210429-W331\_210428081236 #97-98 RT: 0.93-0.94 AV: 2 SB: 12 0.35-0.45 NL: 8.33E6  
T: FTMS + p ESI Full ms [180.00-1500.00]

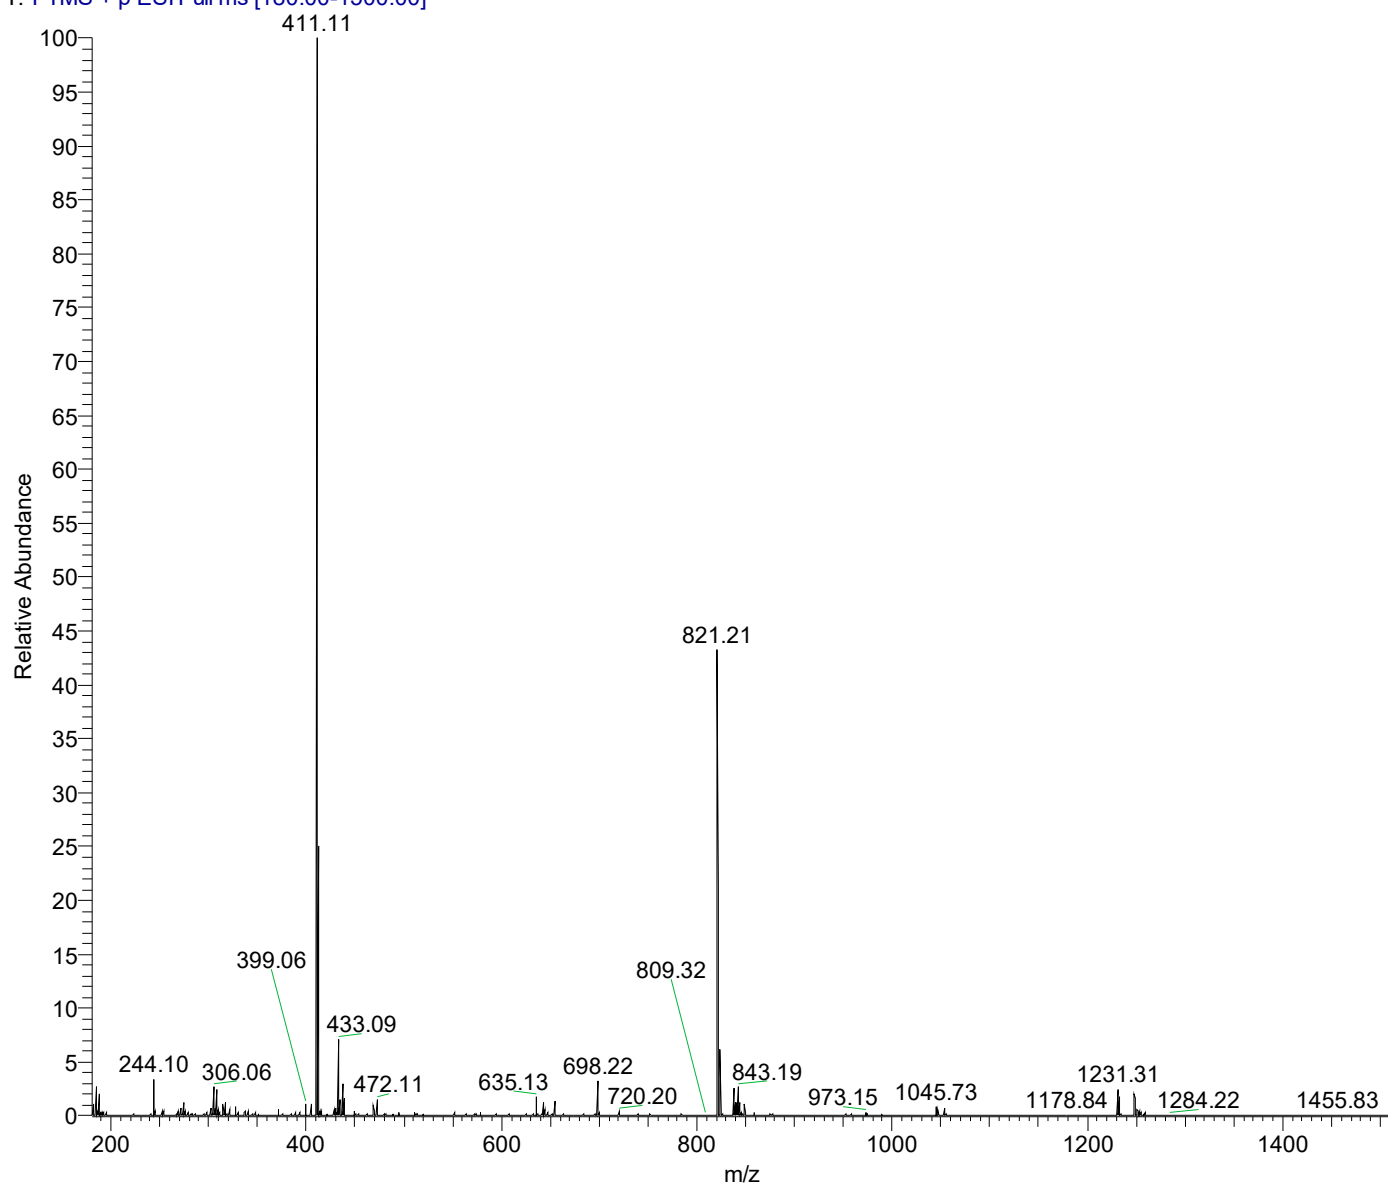

Figure S43. ESIMS spectrum of compound 9.

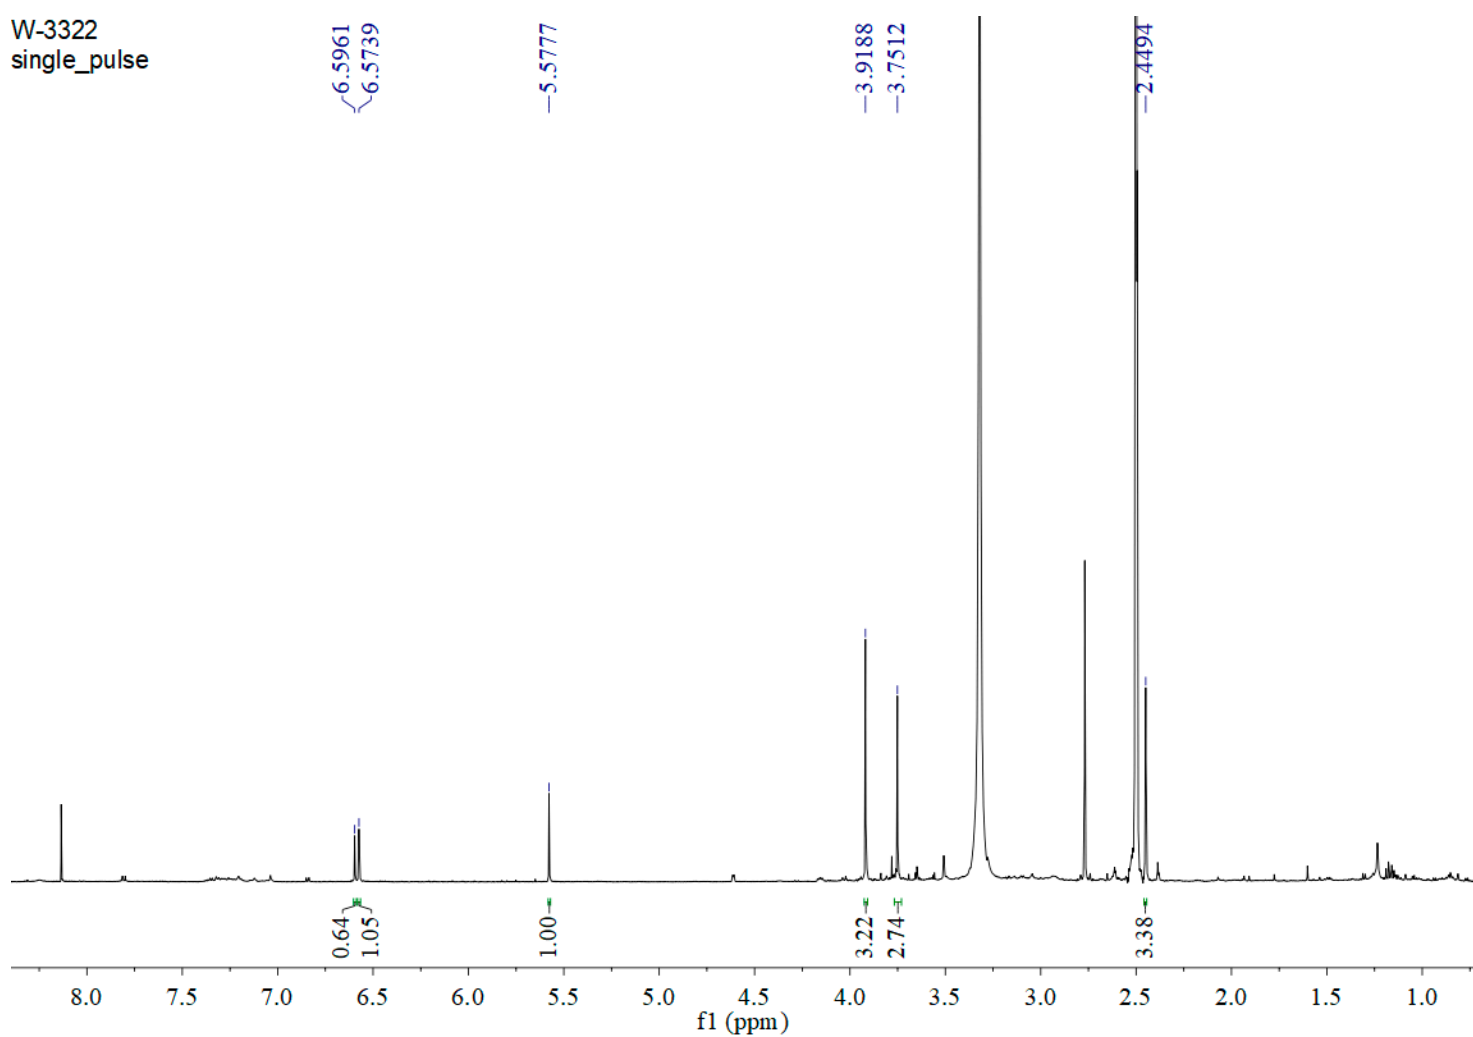

**Figure S44.**  $^1\text{H}$  NMR spectrum (600 MHz) of compound **10** in  $\text{DMSO-}d_6$ .

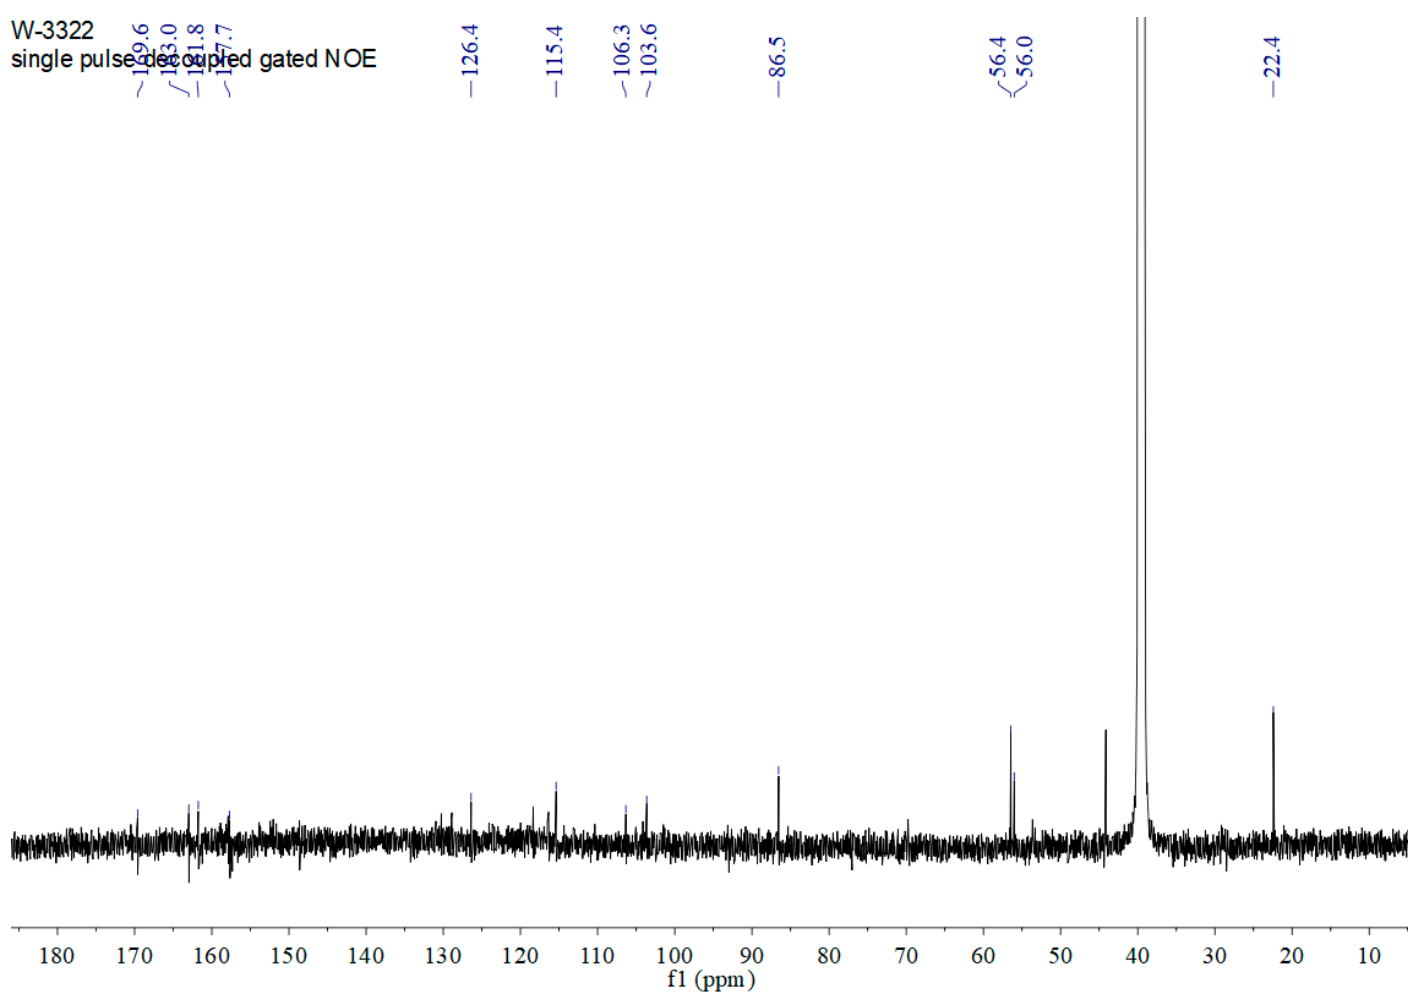

**Figure S45.**  $^{13}\text{C}$  NMR spectrum (150 MHz) of compound **10** in  $\text{DMSO-}d_6$ .

20210429-W332\_210428081236 #106-107 RT: 0.93-0.94 AV: 2 SB: 30 0.12-0.39 NL: 1.82E7  
T: FTMS + p ESI Full ms [180.00-1500.00]

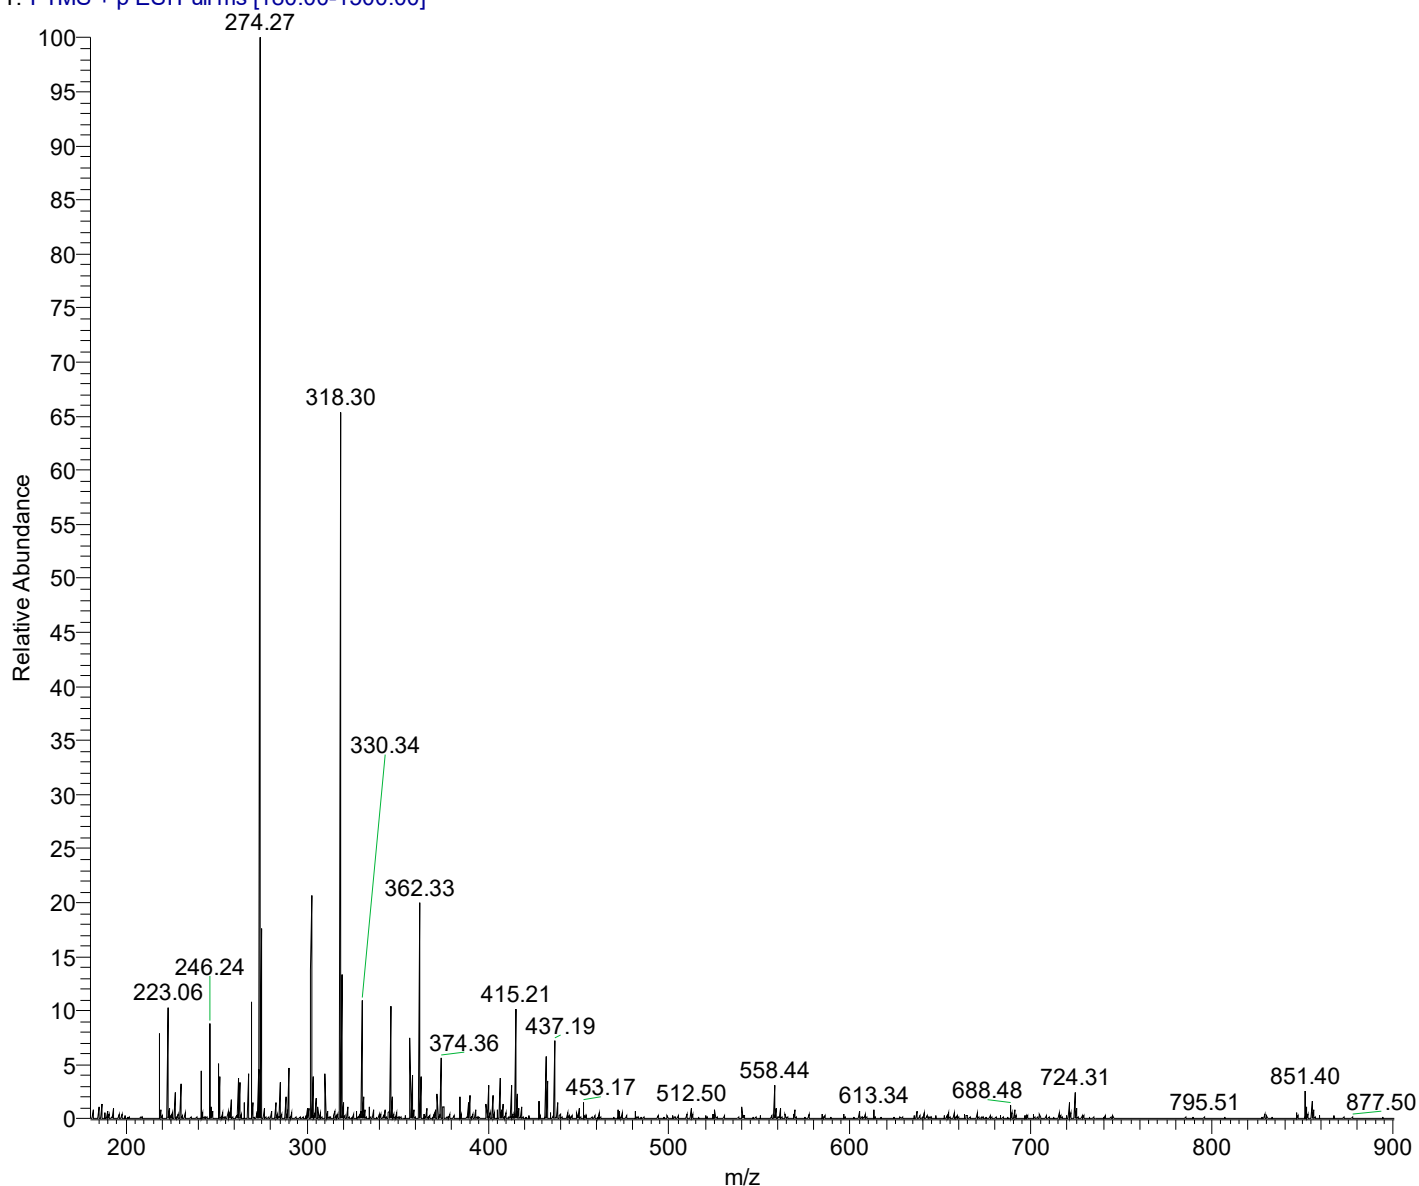

Figure S46. ESIMS spectrum of compound 10.

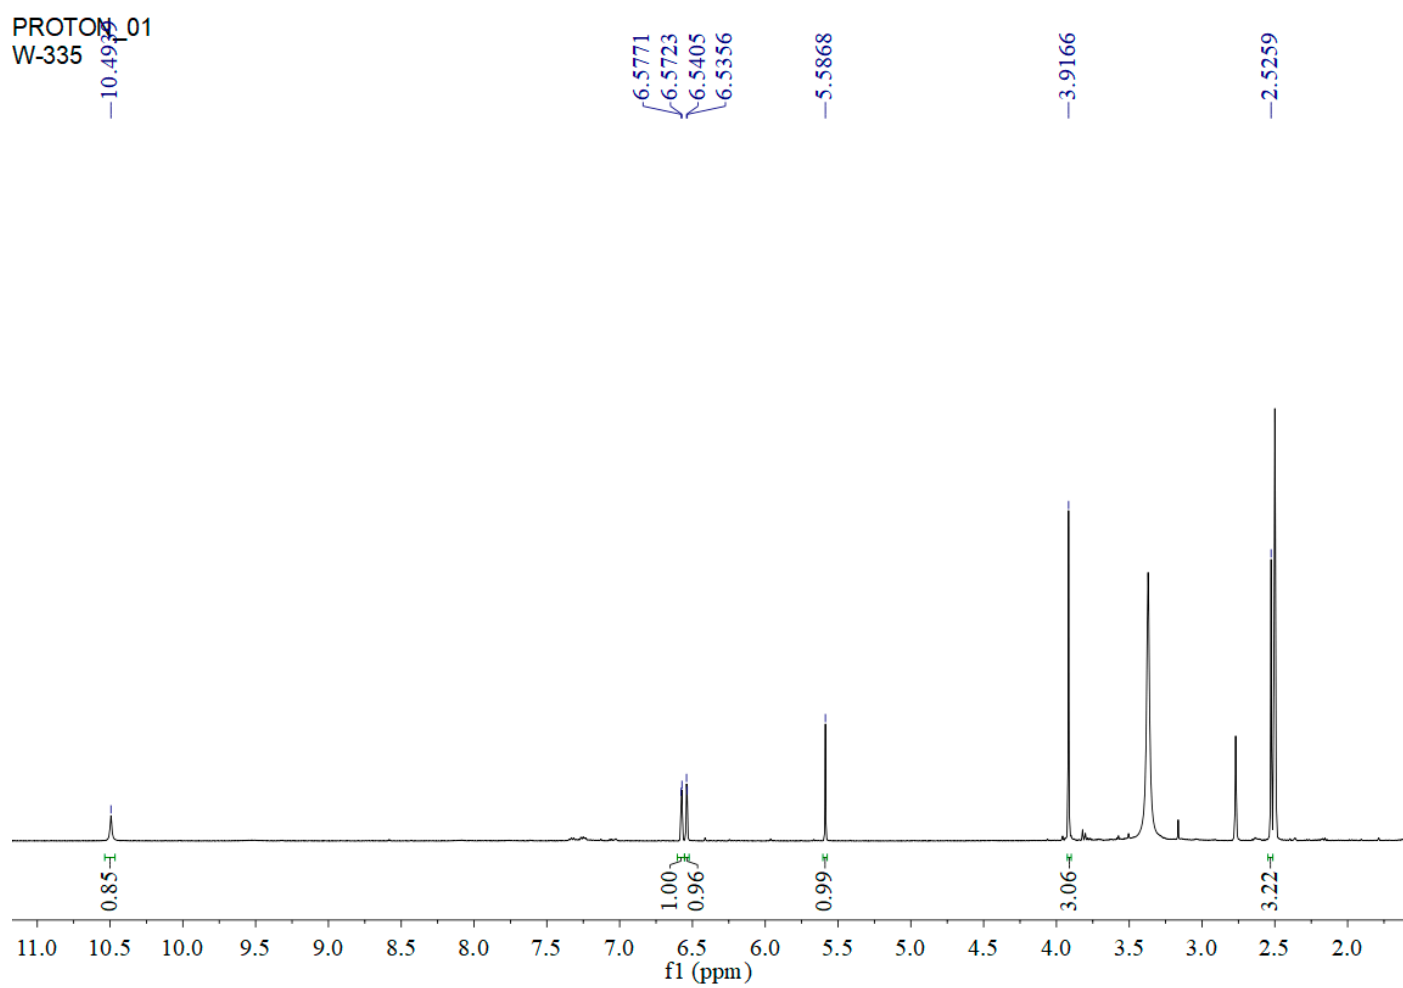

**Figure S47.**  $^1\text{H}$  NMR spectrum (500 MHz) of compound **11** in  $\text{DMSO-}d_6$ .



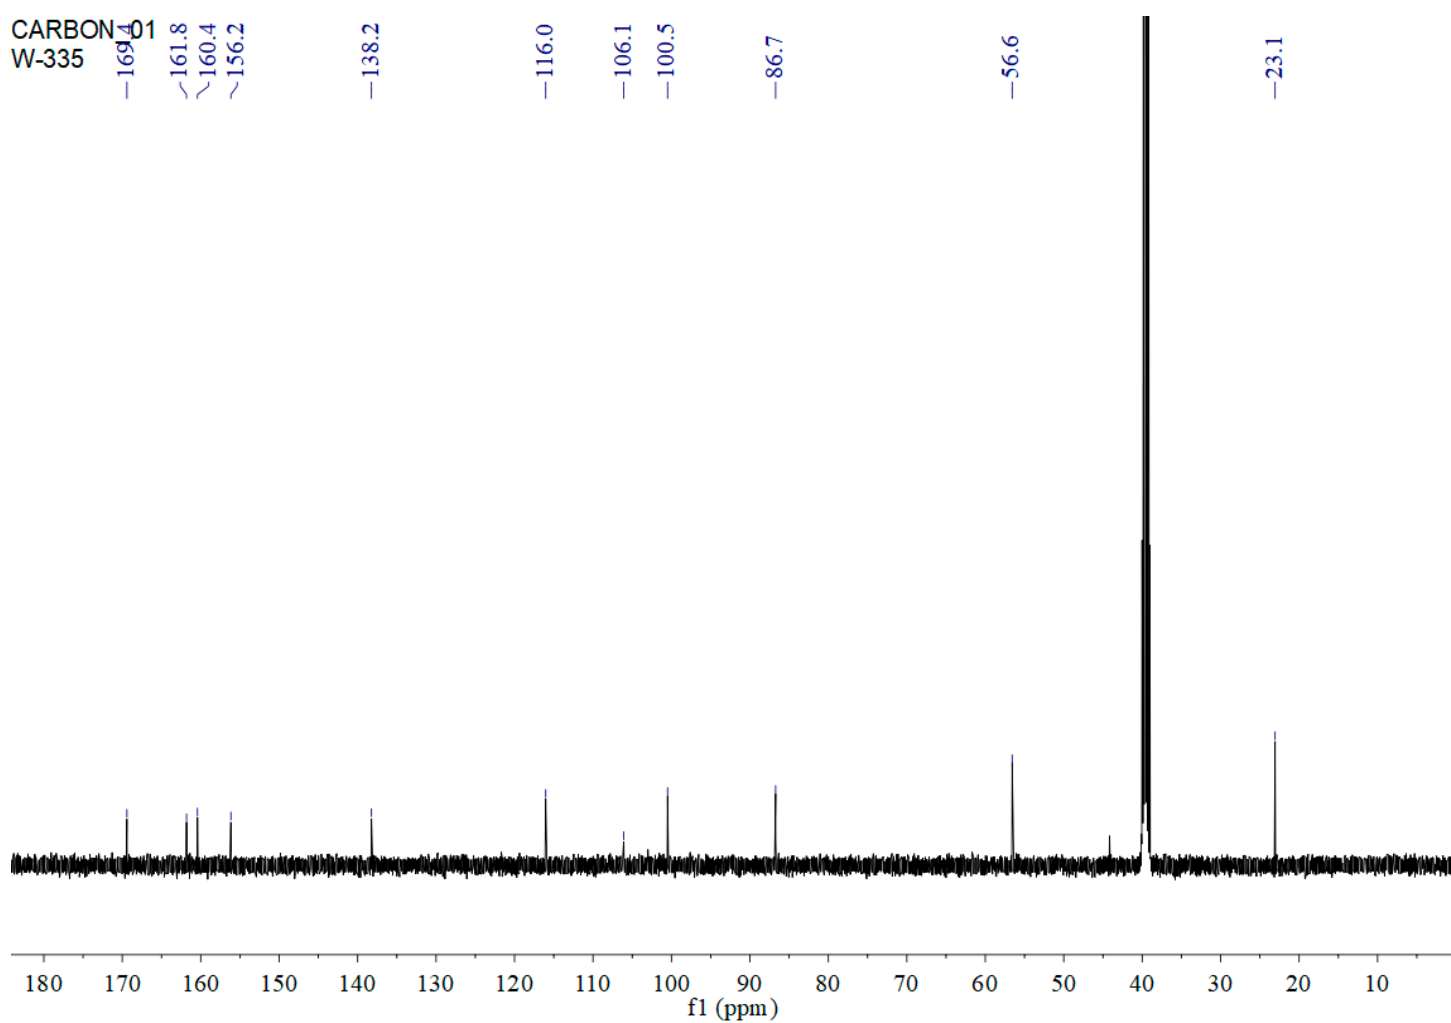

Figure S48.  $^{13}\text{C}$  NMR spectrum (125 MHz) of compound **11** in  $\text{DMSO-}d_6$ .

20210429-W335\_210428081236 #117-118 RT: 0.99-0.99 AV: 2 SB: 23 0.12-0.31 NL: 1.77E7  
T: FTMS + p ESI Full ms [180.00-1500.00]

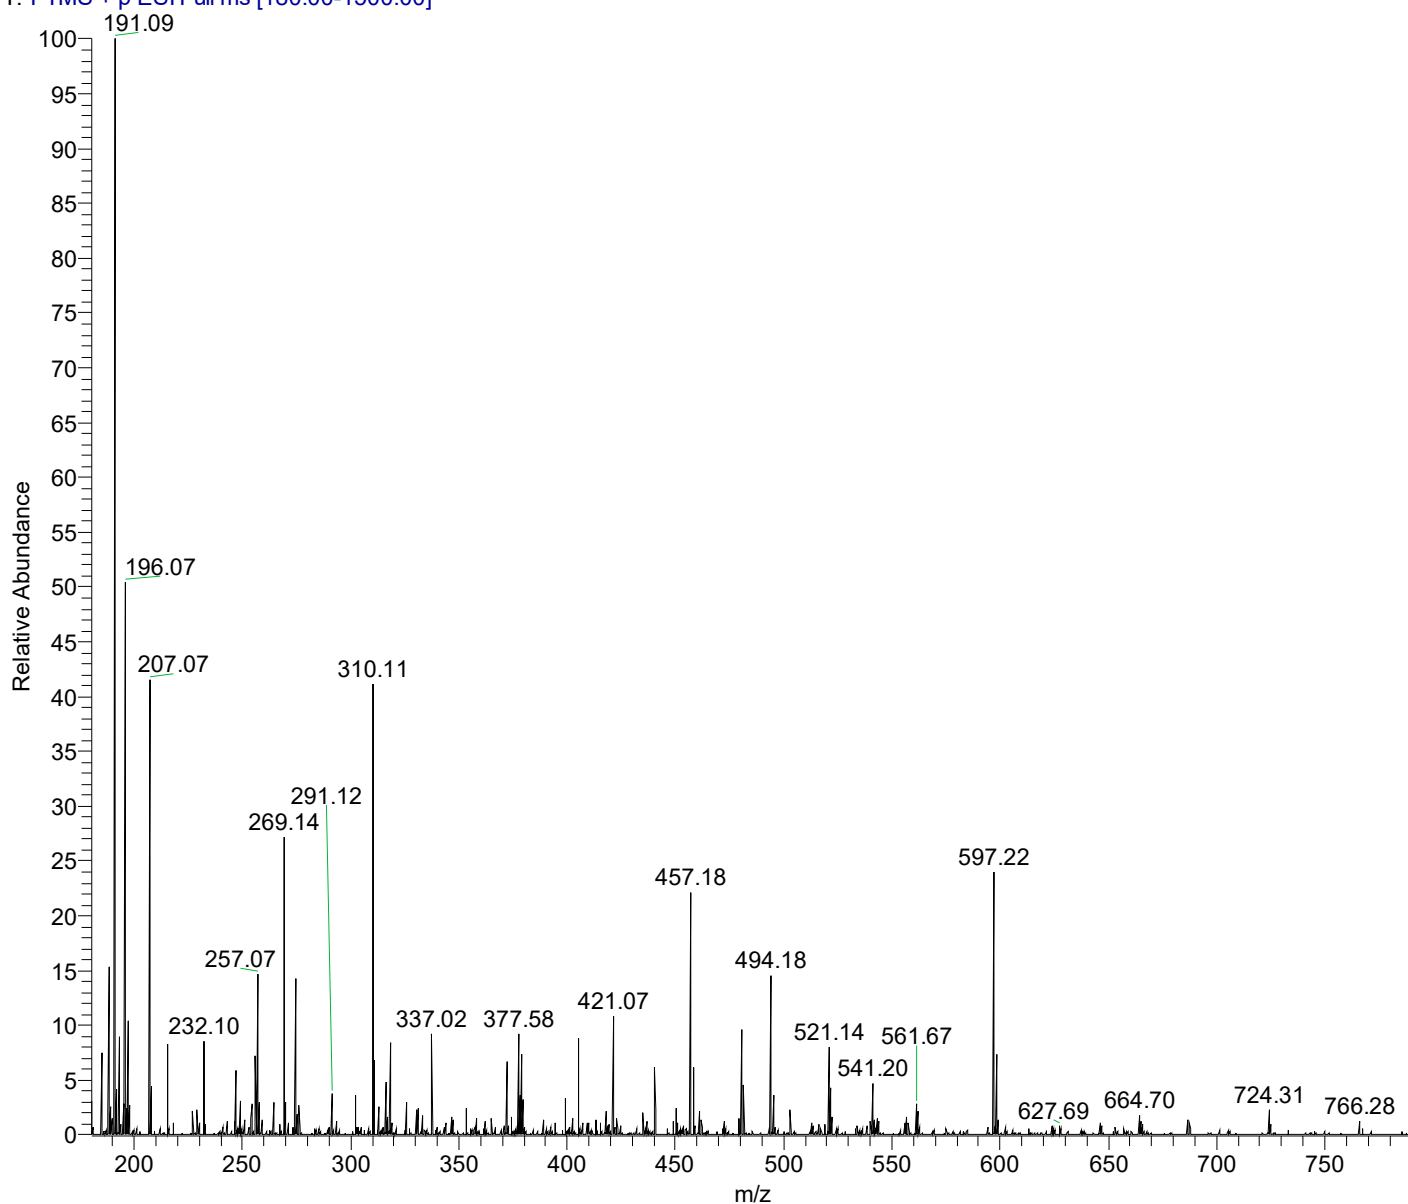

Figure S49. ESIMS spectrum of compound 11.

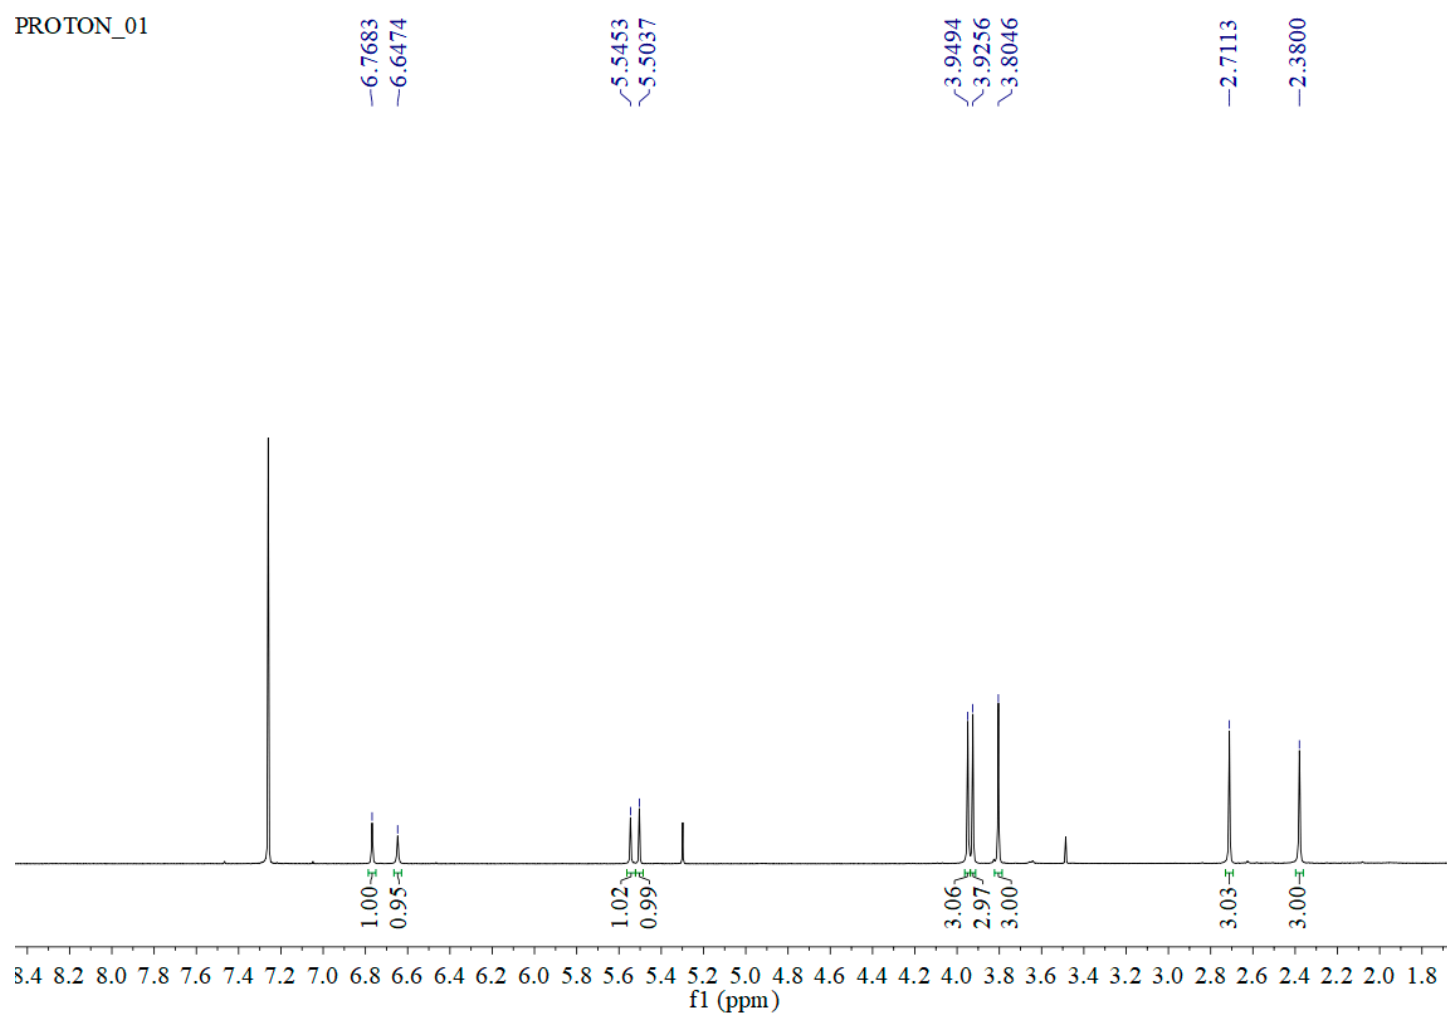

**Figure S50.**  $^1\text{H}$  NMR spectrum (500 MHz) of compound **12** in  $\text{CDCl}_3$ .

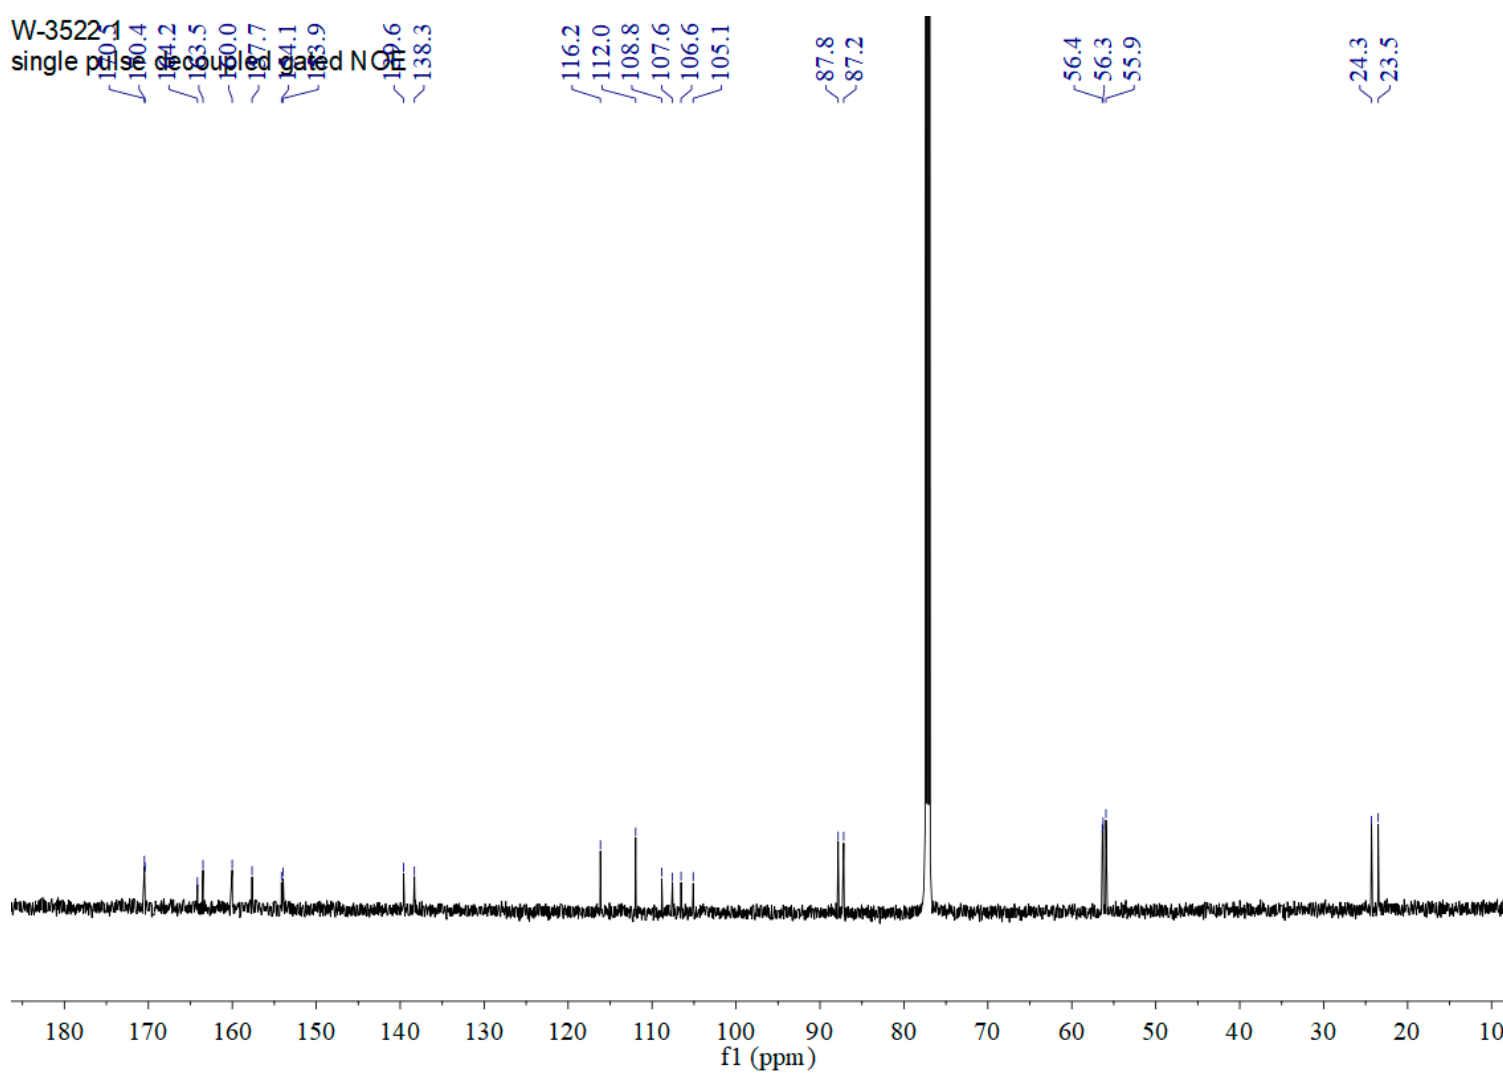

Figure S51.  $^{13}\text{C}$  NMR spectrum (125 MHz) of compound **12** in  $\text{CDCl}_3$ .

20210407-W-3522\_210402144610 #70 RT: 0.55 AV: 1 SB: 10 0.01-0.08 NL: 2.52E7  
T: FTMS + c ESI Full ms [150.00-2000.00]

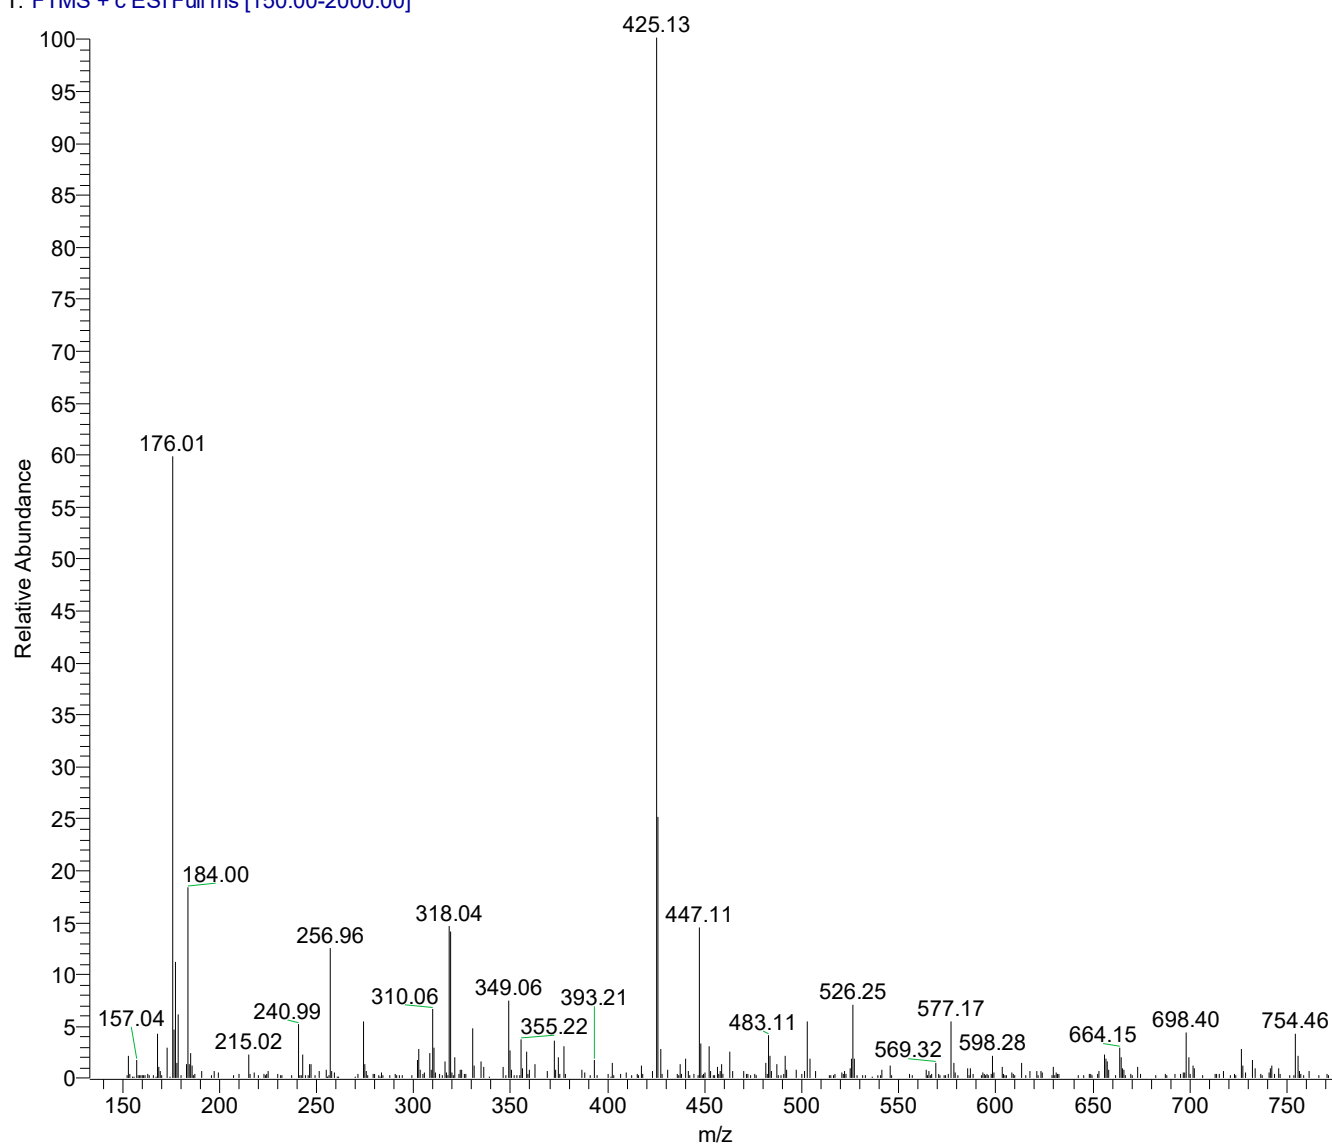

Figure S52. ESIMS spectrum of compound 12.

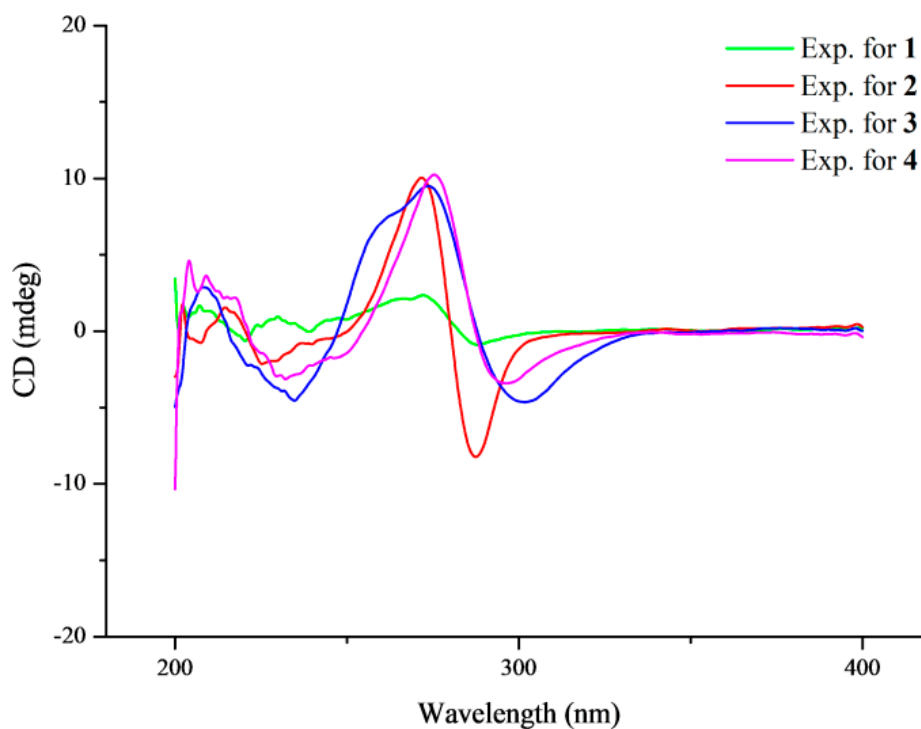

Figure S53. Experimental ECD spectra of compound 1-4.

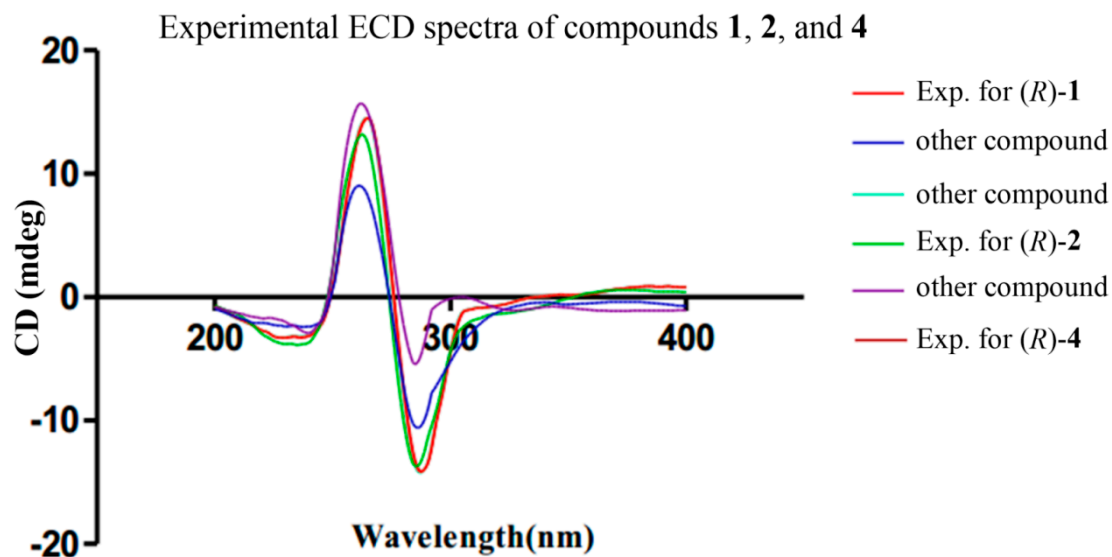

Figure S54. Experimental ECD spectra of compounds 1, 2, and 4 in the previously reported data. It was experimental ECD spectra of compounds 1, 2, and 4 in the previously reported data [S1].

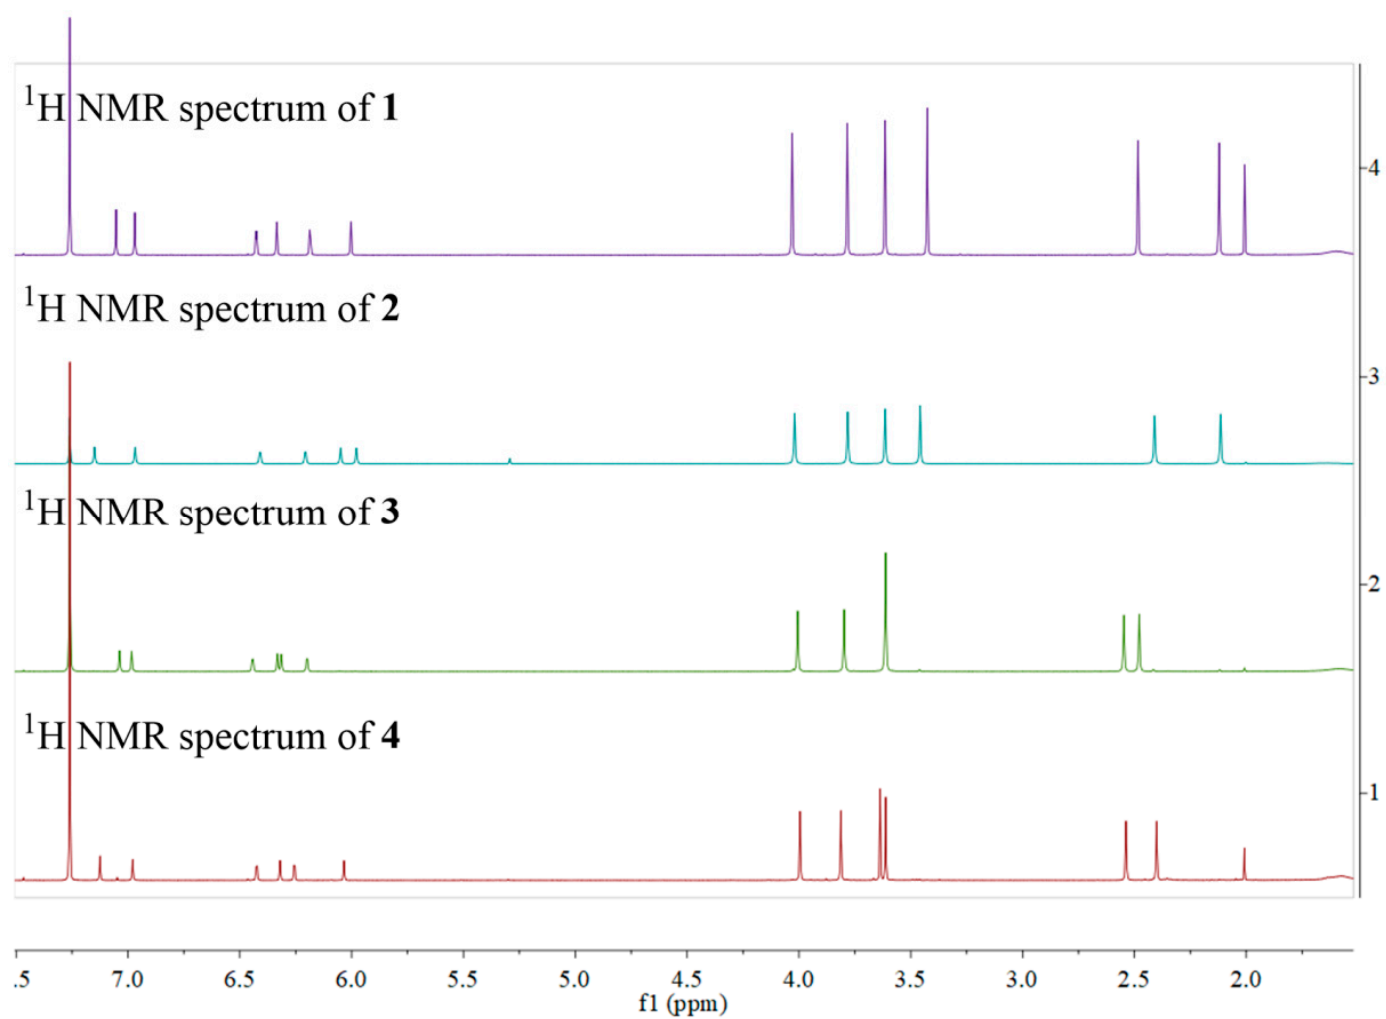

Figure S55. Comparison of  $^1\text{H}$  NMR spectrums (500 MHz) of compounds 1-4 in  $\text{CDCl}_3$ .

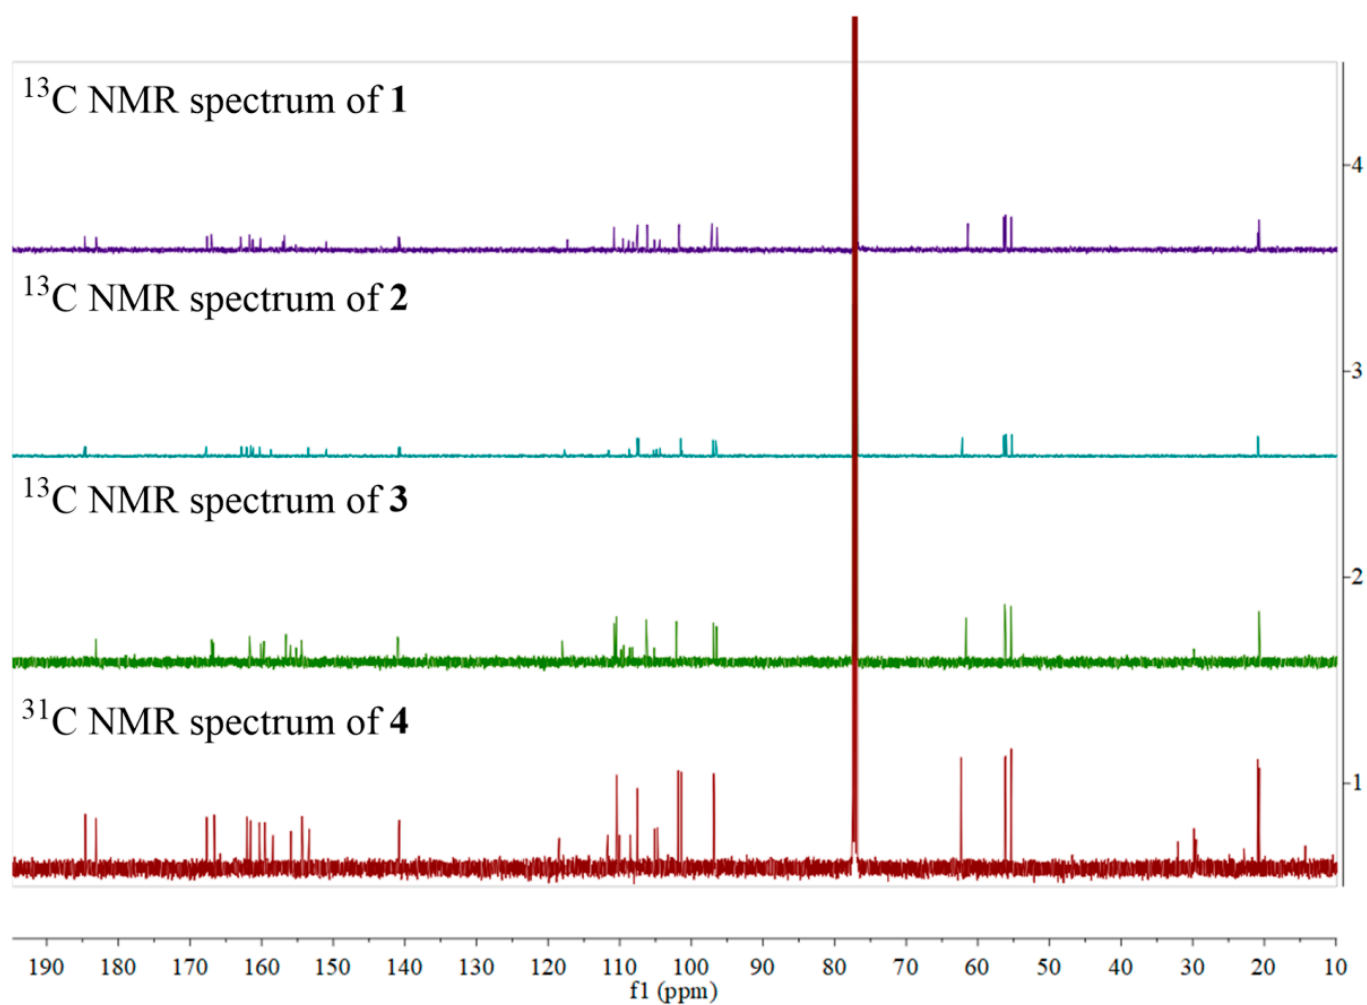

Figure S56. Comparison of  $^{13}\text{C}$  NMR spectrums (125 MHz) of compounds 1-4 in  $\text{CDCl}_3$ .



Compound 5  $^1\text{H}$  NMR (600 MHz,  $\text{CDCl}_3$ )  $\delta$  6.71 (1H, s, H-7), 6.41 (1H, d,  $J = 2.6$  Hz, H-7), 6.34 (1H, s, H-10), 6.04 (1H, d,  $J = 2.7$  Hz, H-9), 5.98 (1H, s, H-3), 5.94 (1H, s, H-3'), 4.17 (3H, s,  $\text{OCH}_3$ -6), 4.03 (3H, s,  $\text{OCH}_3$ -6'), 3.81 (3H, s,  $\text{OCH}_3$ -8), 3.50 (3H, s,  $\text{OCH}_3$ -8'), 2.22 (3H, s, H<sub>3</sub>-11), 2.03 (3H, s, H<sub>3</sub>-11').  $^{13}\text{C}$  NMR (150 MHz,  $\text{CDCl}_3$ )  $\delta$  184.8 (C-4'), 184.4 (C-4), 167.9 (C-2), 167.8 (C-2'), 163.5 (C-5), 162.9 (C-5'), 161.8 (C-8), 161.7 (C-6), 161.4 (C-6'), 159.5 (C-8), 153.5 (C-10a), 151.3 (C-10'a), 141.0 (C-9'a), 140.2 (C-9a), 108.9 (C-5'a), 108.8 (C-5a), 108.7 (C-9), 107.4 (C-3'), 107.3 (C-3), 107.0 (C-10'), 104.6 (C-4'a), 104.3 (C-4a), 99.2 (C-10), 97.2 (C-7'), 96.5 (C-9'), 92.8 (C-7), 56.5 ( $\text{OCH}_3$ -8), 56.4 ( $\text{OCH}_3$ -6'), 56.3 ( $\text{OCH}_3$ -6), 55.3 ( $\text{OCH}_3$ -8'), 20.8 (C-11'), 20.7 (C-11).

Compound 6  $^1\text{H}$  NMR (500 MHz,  $\text{DMSO}-d_6$ )  $\delta$  7.17 (1H, s, H-9), 6.80 (1H, s, H-10), 6.53 (1H, s, H-7'), 6.19 (1H, s, H-9'), 6.13 (1H, s, H-3'), 3.92 (3H, s,  $\text{OCH}_3$ -6'), 3.73 (3H, s,  $\text{OCH}_3$ -8), 3.58 (3H, s,  $\text{OCH}_3$ -8'), 3.33 (3H, s,  $\text{OCH}_3$ -6), 3.26 (1H, d,  $J = 17.0$  Hz, H<sub>3</sub>-3), 2.81 (1H, d,  $J = 17.0$  Hz, H<sub>3</sub>-3'), 2.13 (3H, s, H<sub>3</sub>-11'), 1.67 (3H, s, H<sub>3</sub>-11).  $^{13}\text{C}$  NMR (125 MHz,  $\text{DMSO}-d_6$ )  $\delta$  198.8 (C-4), 184.0 (C-4'), 168.6 (C-2'), 162.6 (C-5), 162.0 (C-5'), 161.6 (C-8'), 160.8 (C-6'), 160.2 (C-8), 158.5 (C-6), 153.9 (C-10a), 150.1 (C-10'a), 142.5 (C-9a), 140.1 (C-9'a), 115.6 (C-7), 109.3 (C-5'a), 107.6 (C-5a), 106.8 (C-3'), 105.2 (C-9), 103.6 (C-10'), 103.3 (C-10), 102.5 (C-4'a), 102.2 (C-4a), 100.5 (C-2), 96.6 (C-9'), 96.4 (C-7'), 61.4 ( $\text{OCH}_3$ -6), 56.0 ( $\text{OCH}_3$ -6'), 55.1 ( $\text{OCH}_3$ -8'), 55.1 ( $\text{OCH}_3$ -8), 47.9 (C-3), 27.6 (C-11), 20.2 (C-11').

Compound 7  $^1\text{H}$  NMR (500 MHz,  $\text{DMSO}-d_6$ )  $\delta$  12.93 (1H, s, OH-5'), 7.24 (1H, s, H-6'), 7.09 (1H, s, H-7'), 6.52 (1H, s, H-7), 6.45 (1H, s, H-3'), 5.93 (1H, s, H-9), 3.90 (3H, s,  $\text{OCH}_3$ -6), 3.75 (3H, s,  $\text{OCH}_3$ -8'), 3.54 (3H, s,  $\text{OCH}_3$ -10'), 3.47 (3H, s,  $\text{OCH}_3$ -8), 3.08 (1H, m, H<sub>3</sub>-3), 2.86 (1H, m, H<sub>3</sub>-3'), 2.48 (3H, s, H<sub>3</sub>-11'), 1.38 (3H, s, H<sub>3</sub>-11).  $^{13}\text{C}$  NMR (125 MHz,  $\text{DMSO}-d_6$ )  $\delta$  198.4 (C-4), 182.5 (C-4'), 168.2 (C-2'), 161.8 (C-8), 161.4 (C-6), 160.8 (C-8'), 160.0 (C-10'), 156.2 (C-5'), 155.6 (C-5), 154.4 (C-10'b), 151.5 (C-10a), 142.3 (C-6'a), 140.0 (C-9a), 118.2 (C-9'), 110.0 (C-10'a), 108.4 (C-5a), 107.4 (C-3'), 106.1 (C-4'a), 105.4 (C-10), 101.8 (C-4a), 100.4 (C-6'), 100.2 (C-2), 97.7 (C-7'), 96.6 (C-7), 95.2 (C-9), 60.9 ( $\text{OCH}_3$ -10'), 56.1 ( $\text{OCH}_3$ -6), 55.9 ( $\text{OCH}_3$ -8), 54.9 ( $\text{OCH}_3$ -8'), 48.1 (C-3), 27.7 (C-11), 20.0 (C-11').

Compound 8  $^1\text{H}$  NMR (500 MHz,  $\text{CDCl}_3$ )  $\delta$  12.80 (1H, s, OH-5), 6.86 (1H, s, H-6), 6.57 (1H, s, H-7), 6.39 (1H, s, H-9), 6.26 (1H, s, H-3), 3.96 (3H, s,  $\text{OCH}_3$ -8), 3.92 (3H, s,  $\text{OCH}_3$ -10), 2.49 (3H, s, H<sub>3</sub>-11).  $^{13}\text{C}$  NMR (125 MHz,  $\text{CDCl}_3$ )  $\delta$  183.0 (C-4), 166.7 (C-2), 161.5 (C-10), 159.2 (C-8), 156.7 (C-5), 155.9 (C-10b), 141.3 (C-6a), 110.4 (C-3), 108.9 (C-4a), 105.9 (C-6), 105.0 (C-10a), 98.0 (C-7), 97.1 (C-9), 56.0 ( $\text{OCH}_3$ -8), 55.6 ( $\text{OCH}_3$ -10), 20.6 (C-11).

Compound 9  $^1\text{H}$  NMR (500 MHz,  $\text{DMSO}-d_6$ )  $\delta$  10.24 (1H, s, OH-7), 6.73 (1H, s, H-6), 5.57 (1H, s, H-3), 3.94 (3H, s,  $\text{OCH}_3$ -4), 2.60 (3H, s, H<sub>3</sub>-9).  $^{13}\text{C}$  NMR (125 MHz,  $\text{DMSO}-d_6$ )  $\delta$  169.7 (C-4), 161.8 (C-2), 158.6 (C-8a), 154.0 (C-7), 137.1 (C-5), 115.6 (C-6), 106.2 (C-4a), 105.8 (C-8), 86.5 (C-3), 56.6 ( $\text{OCH}_3$ -4), 23.3 (C-9).

Compound 10  $^1\text{H}$  NMR (600 MHz,  $\text{DMSO}-d_6$ )  $\delta$  6.60 (1H, s, H-6), 6.57 (1H, s, H-8), 5.58 (1H, s, H-3), 3.92 (3H, s,  $\text{OCH}_3$ -4), 3.75 (3H, s,  $\text{OCH}_3$ -7), 2.45 (3H, s, H<sub>3</sub>-9).  $^{13}\text{C}$  NMR (150 MHz,  $\text{DMSO}-d_6$ )  $\delta$  169.6 (C-4), 163.0 (C-7), 161.8 (C-2), 157.7 (C-8a), 136.4 (C-5), 115.4 (C-6), 106.3 (C-4a), 103.6 (C-8), 86.5 (C-3), 56.4 ( $\text{OCH}_3$ -4), 56.0 ( $\text{OCH}_3$ -7), 22.4 (C-9).

Compound 11  $^1\text{H}$  NMR (500 MHz,  $\text{DMSO}-d_6$ )  $\delta$  10.49 (1H, s, OH-7), 6.57 (1H, d,  $J = 2.4$  Hz, H-6), 6.54 (1H, d,  $J = 2.4$  Hz, H-8), 5.59 (1H, s, H-3), 3.92 (3H, s,  $\text{OCH}_3$ -4), 2.53 (3H, s, H<sub>3</sub>-9).  $^{13}\text{C}$  NMR (125 MHz,  $\text{DMSO}-d_6$ )  $\delta$  169.4 (C-4), 161.8 (C-2), 160.4 (C-7), 156.2 (C-8a), 138.2 (C-5), 116.0 (C-6), 106.1 (C-4a), 100.5 (C-8), 86.7 (C-3), 56.6 ( $\text{OCH}_3$ -4), 23.1 (C-9).

Compound 12  $^1\text{H}$  NMR (500 MHz,  $\text{CDCl}_3$ )  $\delta$  6.77 (1H, s, H-6), 6.65 (1H, s, H-6'), 5.55 (1H, s, H-3), 5.50 (1H, s, H-3'), 3.95 (3H, s,  $\text{OCH}_3$ -4), 3.93 (3H, s,  $\text{OCH}_3$ -4'), 3.80 (3H, s,  $\text{OCH}_3$ -7), 2.71 (3H, s, H<sub>3</sub>-9), 2.38 (3H, s, H<sub>3</sub>-9').  $^{13}\text{C}$  NMR (125 MHz,  $\text{CDCl}_3$ )  $\delta$  170.5 (C-4), 170.4 (C-4'), 164.2 (C-2), 163.5 (C-2'), 160.0 (C-7), 157.7 (C-7'), 154.1 (C-8'a), 153.9 (C-8a), 139.6 (C-5), 138.3 (C-5'), 116.2 (C-6'), 112.0 (C-6), 108.8 (C-4a), 107.6 (C-4'a), 106.6 (C-8), 105.1 (C-8'), 87.8 (C-3), 87.2 (C-3'), 56.4 ( $\text{OCH}_3$ -4), 56.3 ( $\text{OCH}_3$ -4'), 55.9 ( $\text{OCH}_3$ -7), 24.3 (C-9), 23.5 (C-9').

Figure S57.  $^1\text{H}$  and  $^{13}\text{C}$  NMR data of compounds 5-12.

**Table S1.**  $^1\text{H}$  NMR (600 MHz) and  $^{13}\text{C}$  NMR (150 MHz) data of compound **13** in  $\text{DMSO-}d_6$ .

| position            | $\delta_{\text{C}}$ , type | $\delta_{\text{H}}$ , ( $J$ in Hz) | HMBC         |
|---------------------|----------------------------|------------------------------------|--------------|
| 2                   | 168.1, $\text{C}_q$        |                                    |              |
| 3                   | 109.9, CH                  | 6.52 (1H, s)                       | 2, 4a, 11    |
| 4                   | 182.5, $\text{C}_q$        |                                    |              |
| 4a                  | 108.3, $\text{C}_q$        |                                    |              |
| 5                   | 155.4, $\text{C}_q$        |                                    |              |
| 6                   | 105.3, CH                  | 7.10 (1H, s)                       | 4a, 7        |
| 6a                  | 139.9, $\text{C}_q$        |                                    |              |
| 7                   | 101.7, CH                  | 7.24 (1H, s)                       | 6, 8, 9, 10a |
| 8                   | 160.3, $\text{C}_q$        |                                    |              |
| 9                   | 119.7, $\text{C}_q$        |                                    |              |
| 10                  | 156.1, $\text{C}_q$        |                                    |              |
| 10a                 | 107.4, $\text{C}_q$        |                                    |              |
| 10b                 | 154.4, $\text{C}_q$        |                                    |              |
| 11                  | 19.9, $\text{CH}_3$        | 2.48 (3H, s)                       | 2, 3         |
| 3'                  | 148.5, $\text{C}_q$        |                                    |              |
| 4'                  | 105.9, CH                  | 6.93 (1H, s)                       | 3', 5'       |
| 5'                  | 138.7, $\text{C}_q$        |                                    |              |
| 6'                  | 101.9, $\text{C}_q$        |                                    |              |
| 7'                  | 154.1, $\text{C}_q$        |                                    |              |
| 8'                  | 105.1, $\text{C}_q$        |                                    |              |
| 8'a                 | 135.8, $\text{C}_q$        |                                    |              |
| 9'                  | 96.8, CH                   | 5.96 (1H, d, $J = 2.5$ )           | 11', 12'a    |
| 10'                 | 157.9, $\text{C}_q$        |                                    |              |
| 11'                 | 94.5, CH                   | 6.47 (1H, d, $J = 2.6$ )           | 9', 12'a     |
| 12'                 | 157.8, $\text{C}_q$        |                                    |              |
| 12'a                | 104.5, $\text{C}_q$        |                                    |              |
| 13'                 | 152.8, $\text{C}_q$        |                                    |              |
| 14'                 | 10.3, $\text{CH}_3$        | 2.35 (3H, s)                       | 4', 5'       |
| $\text{OCH}_3$ -8   | 55.8, $\text{CH}_3$        | 3.73 (3H, s)                       | 8            |
| $\text{OCH}_3$ -10  | 60.6, $\text{CH}_3$        | 3.44 (3H, s)                       | 10           |
| $\text{OCH}_3$ -10' | 54.9, $\text{CH}_3$        | 3.51 (3H, s)                       | 10'          |
| $\text{OCH}_3$ -12' | 56.7, $\text{CH}_3$        | 4.09 (3H, s)                       | 12'          |
| NH-1'               |                            | 12.98 (1H, s)                      |              |
| OH-5                |                            | 12.92 (1H, s)                      | 4a, 6        |
| OH-7'               |                            | 12.47 (1H, s)                      | 8'           |
| OH-13'              |                            | 10.36 (1H, s)                      | 6', 12'a     |

**Table S2.**  $^1\text{H}$  NMR (600 MHz) and  $^{13}\text{C}$  NMR (150 MHz) data of compound **14** in  $\text{DMSO}-d_6$ .

| position            | $\delta_{\text{C}}$ , type | $\delta_{\text{H}}$ , ( $J$ in Hz) | HMBC          |
|---------------------|----------------------------|------------------------------------|---------------|
| 2                   | 169.0, $\text{C}_q$        |                                    |               |
| 3                   | 106.8, CH                  | 6.25 (1H, s)                       | 2, 4a, 11     |
| 4                   | 184.1, $\text{C}_q$        |                                    |               |
| 4a                  | 103.8, $\text{C}_q$        |                                    |               |
| 5                   | 160.8, $\text{C}_q$        |                                    |               |
| 5a                  | 110.7, $\text{C}_q$        |                                    |               |
| 6                   | 157.3, $\text{C}_q$        |                                    |               |
| 7                   | 120.1, $\text{C}_q$        |                                    |               |
| 8                   | 160.4, $\text{C}_q$        |                                    |               |
| 9                   | 101.8, CH                  | 7.27 (1H, s)                       | 5a, 7, 8, 10  |
| 9a                  | 139.9, $\text{C}_q$        |                                    |               |
| 10                  | 101.3, CH                  | 7.37 (1H, s)                       | 4, 4a, 5a, 9  |
| 10a                 | 152.3, $\text{C}_q$        |                                    |               |
| 11                  | 20.3, $\text{CH}_3$        | 2.44 (3H, s)                       | 2, 3          |
| 3'                  | 148.6, $\text{C}_q$        |                                    |               |
| 4'                  | 105.9, CH                  | 6.92 (1H, s)                       | 3', 5'        |
| 5'                  | 138.7, $\text{C}_q$        |                                    |               |
| 6'                  | 101.9, $\text{C}_q$        |                                    |               |
| 7'                  | 154.1, $\text{C}_q$        |                                    |               |
| 8'                  | 105.2, $\text{C}_q$        |                                    |               |
| 8'a                 | 135.8, $\text{C}_q$        |                                    |               |
| 9'                  | 96.7, CH                   | 5.96 (1H, d, $J = 2.2$ )           | 11', 12'a     |
| 10'                 | 157.8, $\text{C}_q$        |                                    |               |
| 11'                 | 94.6, CH                   | 6.46 (1H, d, $J = 2.2$ )           | 9', 12'a      |
| 12'                 | 157.8, $\text{C}_q$        |                                    |               |
| 12'a                | 104.6, $\text{C}_q$        |                                    |               |
| 13'                 | 152.7, $\text{C}_q$        |                                    |               |
| 14'                 | 10.3, $\text{CH}_3$        | 2.34 (3H, s)                       | 3', 4', 5'    |
| $\text{OCH}_3$ -6   | 61.1, $\text{CH}_3$        | 3.41 (3H, s)                       | 6             |
| $\text{OCH}_3$ -8   | 55.8, $\text{CH}_3$        | 3.73 (3H, s)                       | 8             |
| $\text{OCH}_3$ -10' | 54.8, $\text{CH}_3$        | 3.50 (3H, s)                       | 10'           |
| $\text{OCH}_3$ -12' | 56.7, $\text{CH}_3$        | 4.08 (3H, s)                       | 12'           |
| NH-1'               |                            | 12.98 (1H, s)                      | 5'            |
| OH-7'               |                            | 12.46 (1H, s)                      | 8'            |
| OH-13'              |                            | 10.35 (1H, s)                      | 6', 12'a, 13' |

**Table S3.** <sup>1</sup>H NMR (500 MHz) data of compounds **1-4** in CDCl<sub>3</sub>.

| position              | 1                               | 2                               | 3                               | 4                               |
|-----------------------|---------------------------------|---------------------------------|---------------------------------|---------------------------------|
| 3                     | 6.33 (1H, s)                    | 6.05 (1H, s)                    | 6.31 (1H, s)                    | 6.03 (1H, s)                    |
| 6                     | 7.05 (1H, s)                    |                                 | 7.04 (1H, s)                    |                                 |
| 7                     | 6.97 (1H, s)                    |                                 | 6.98 (1H, s)                    |                                 |
| 9                     |                                 | 6.97 (1H, s)                    |                                 | 6.98 (1H, s)                    |
| 10                    |                                 | 7.15 (1H, s)                    |                                 | 7.12 (1H, s)                    |
| 11                    | 2.48 (3H, s)                    | 2.41 (3H, s)                    | 2.48 (3H, s)                    | 2.40 (3H, s)                    |
| 3'                    | 6.00 (1H, s)                    | 5.98 (1H, s)                    | 6.33 (1H, s)                    | 6.32 (1H, s)                    |
| 7'                    | 6.43 (1H, d, <i>J</i> = 2.2 Hz) | 6.41 (1H, d, <i>J</i> = 2.3 Hz) | 6.20 (1H, d, <i>J</i> = 2.2 Hz) | 6.26 (1H, d, <i>J</i> = 2.2 Hz) |
| 9'                    | 6.19 (1H, d, <i>J</i> = 2.2 Hz) | 6.21 (1H, d, <i>J</i> = 2.2 Hz) | 6.44 (1H, d, <i>J</i> = 2.3 Hz) | 6.42 (1H, d, <i>J</i> = 2.3 Hz) |
| 11'                   | 2.12 (3H, s)                    | 2.11 (3H, s)                    | 2.55 (3H, s)                    | 2.54 (3H, s)                    |
| OCH <sub>3</sub> -6   |                                 | 3.46 (3H, s)                    |                                 | 3.64 (3H, s)                    |
| OCH <sub>3</sub> -8   | 3.78 (3H, s)                    | 3.78 (3H, s)                    | 3.80 (3H, s)                    | 3.81 (3H, s)                    |
| OCH <sub>3</sub> -10  | 3.43 (3H, s)                    |                                 | 3.61 (3H, s)                    |                                 |
| OCH <sub>3</sub> -6'  | 4.03 (3H, s)                    | 4.02 (3H, s)                    |                                 |                                 |
| OCH <sub>3</sub> -8'  | 3.61 (3H, s)                    | 3.61 (3H, s)                    | 3.61 (3H, s)                    | 3.61 (3H, s)                    |
| OCH <sub>3</sub> -10' |                                 |                                 | 4.01 (3H, s)                    | 3.99 (3H, s)                    |

**Table S4.**  $^{13}\text{C}$  NMR (125 MHz) data of compounds **1–4** in  $\text{CDCl}_3$ .

| position              | 1                     | 2                     | 3                     | 4                     |
|-----------------------|-----------------------|-----------------------|-----------------------|-----------------------|
| 2                     | 167.0, C <sub>q</sub> | 167.8, C <sub>q</sub> | 167.0, C <sub>q</sub> | 167.7, C <sub>q</sub> |
| 3                     | 110.8, CH             | 107.6, CH             | 110.8, CH             | 107.5, CH             |
| 4                     | 183.1, C <sub>q</sub> | 184.6, C <sub>q</sub> | 183.1, C <sub>q</sub> | 184.6, C <sub>q</sub> |
| 4a                    | 109.5, C <sub>q</sub> | 104.8, C <sub>q</sub> | 109.5, C <sub>q</sub> | 104.7, C <sub>q</sub> |
| 5                     | 156.8, C <sub>q</sub> | 162.1, C <sub>q</sub> | 156.6, C <sub>q</sub> | 162.1, C <sub>q</sub> |
| 5a                    |                       | 111.6, C <sub>q</sub> |                       | 111.7, C <sub>q</sub> |
| 6                     | 106.2, CH             | 158.7, C <sub>q</sub> | 106.3, CH             | 158.4, C <sub>q</sub> |
| 6a                    | 140.9, C <sub>q</sub> |                       | 140.9, C <sub>q</sub> |                       |
| 7                     | 101.7, CH             | 117.7, C <sub>q</sub> | 102.1, CH             | 118.5, C <sub>q</sub> |
| 8                     | 160.2, C <sub>q</sub> | 160.3, C <sub>q</sub> | 160.1, C <sub>q</sub> | 160.3, C <sub>q</sub> |
| 9                     | 117.3, C <sub>q</sub> | 101.5, CH             | 118.0, C <sub>q</sub> | 101.8, CH             |
| 9a                    |                       | 140.8, C <sub>q</sub> |                       | 140.8, C <sub>q</sub> |
| 10                    | 157.0, C <sub>q</sub> | 101.4, CH             | 156.7, C <sub>q</sub> | 101.4, CH             |
| 10a                   | 108.1, C <sub>q</sub> | 153.5, C <sub>q</sub> | 108.2, C <sub>q</sub> | 153.3, C <sub>q</sub> |
| 10b                   | 155.2, C <sub>q</sub> |                       | 155.2, C <sub>q</sub> |                       |
| 11                    | 20.7, CH <sub>3</sub> | 20.9, CH <sub>3</sub> | 20.7, CH <sub>3</sub> | 20.9, CH <sub>3</sub> |
| 2'                    | 167.6, C <sub>q</sub> | 167.7, C <sub>q</sub> | 166.7, C <sub>q</sub> | 166.6, C <sub>q</sub> |
| 3'                    | 107.5, CH             | 107.4, CH             | 110.5, CH             | 110.4, CH             |
| 4'                    | 184.7, C <sub>q</sub> | 184.7, C <sub>q</sub> | 183.1, C <sub>q</sub> | 183.1, C <sub>q</sub> |
| 4'a                   | 104.4, C <sub>q</sub> | 104.4, C <sub>q</sub> | 108.6, C <sub>q</sub> | 108.5, C <sub>q</sub> |
| 5'                    | 162.9, C <sub>q</sub> | 162.8, C <sub>q</sub> | 154.4, C <sub>q</sub> | 154.3, C <sub>q</sub> |
| 5'a                   | 108.7, C <sub>q</sub> | 108.7, C <sub>q</sub> |                       |                       |
| 6'                    | 161.2, C <sub>q</sub> | 161.2, C <sub>q</sub> | 109.8, C <sub>q</sub> | 110.0, C <sub>q</sub> |
| 6'a                   |                       |                       | 141.0, C <sub>q</sub> | 140.9, C <sub>q</sub> |
| 7'                    | 97.1, CH              | 97.0, CH              | 96.5, CH              | 96.8, CH              |
| 8'                    | 161.7, C <sub>q</sub> | 161.5, C <sub>q</sub> | 161.7, C <sub>q</sub> | 161.6, C <sub>q</sub> |
| 9'                    | 96.4, CH              | 96.6, CH              | 96.9, CH              | 96.9, CH              |
| 9'a                   | 140.8, C <sub>q</sub> | 140.7, C <sub>q</sub> |                       |                       |
| 10'                   | 105.2, C <sub>q</sub> | 105.3, C <sub>q</sub> | 159.7, C <sub>q</sub> | 159.5, C <sub>q</sub> |
| 10'a                  | 151.0, C <sub>q</sub> | 151.0, C <sub>q</sub> | 105.2, C <sub>q</sub> | 105.1, C <sub>q</sub> |
| 10'b                  |                       |                       | 155.9, C <sub>q</sub> | 155.9, C <sub>q</sub> |
| 11'                   | 20.9, CH <sub>3</sub> | 20.8, CH <sub>3</sub> | 20.7, CH <sub>3</sub> | 20.7, CH <sub>3</sub> |
| OCH <sub>3</sub> -6   |                       | 62.2, CH <sub>3</sub> |                       | 62.3, CH <sub>3</sub> |
| OCH <sub>3</sub> -8   | 56.1, CH <sub>3</sub> | 56.1, CH <sub>3</sub> | 56.3, CH <sub>3</sub> | 56.2, CH <sub>3</sub> |
| OCH <sub>3</sub> -10  | 61.4, CH <sub>3</sub> |                       | 61.6, CH <sub>3</sub> |                       |
| OCH <sub>3</sub> -6'  | 56.4, CH <sub>3</sub> | 56.3, CH <sub>3</sub> |                       |                       |
| OCH <sub>3</sub> -8'  | 55.3, CH <sub>3</sub> | 55.3, CH <sub>3</sub> | 55.4, CH <sub>3</sub> | 55.3, CH <sub>3</sub> |
| OCH <sub>3</sub> -10' |                       |                       | 56.2, CH <sub>3</sub> | 56.1, CH <sub>3</sub> |

**Table S5.** Optical rotations of compounds **1–4** in MeOH at 20 °C.

| compound | $[\alpha]^{20}_{\text{D}}$      |
|----------|---------------------------------|
| 1        | -84.40 ( <i>c</i> 0.0009, MeOH) |
| 2        | +4.17 ( <i>c</i> 0.0016, MeOH)  |
| 3        | +1.60 ( <i>c</i> 0.0005, MeOH)  |
| 4        | -28.10 ( <i>c</i> 0.0005, MeOH) |

## References

- (S1) He, Y.; Tian, J.; Chen, X.; Sun, W.; Zhu, H.; Li, Q.; Lei, L.; Yao, G.; Xue, Y.; Wang, J.; Li, H.; Zhang, Y., Fungal naphtho- $\gamma$ -pyrones: Potent antibiotics for drug-resistant microbial pathogens. *Sci. Rep.* **2016**, *6*, 24291.
